# Supplementary material for: Changes in PM 2.5 Peat Combustion Source Profiles with Atmospheric Aging in an Oxidation Flow Reactor
Source: Copernicus journal article supplement (doi:10.5194/amt-2019-198), 2019-05-29
Supplement: Supplementary file 1 [file amt-2019-198-supplement.pdf]

# Supplemental Information

## Changes in PM<sub>2.5</sub> Peat Combustion Source Profiles with Atmospheric Aging in an Oxidation Flow Reactor

Judith C. Chow<sup>a,b\*</sup>, Junji Cao<sup>b,c</sup>, L.-W. Antony Chen<sup>d</sup>, Xiaoliang Wang<sup>a</sup>, Qiyuan Wang<sup>b,c</sup>, Jie Tian<sup>b,c</sup>,  
Steven Sai Hang Ho<sup>a,e</sup>, Tessa B. Carlson<sup>a</sup>, Steven D. Kohl<sup>a</sup>, John G. Watson<sup>a,b</sup>

<sup>a</sup>Division of Atmospheric Sciences, Desert Research Institute, Reno, Nevada, USA

<sup>b</sup>Key Laboratory of Aerosol Chemistry and Physics, Institute of Earth Environment, Chinese Academy of Sciences, Xi'an, 710061, China.

<sup>c</sup>CAS Center for Excellence in Quaternary Science and Global Change, Xi'an, 710061, China

<sup>d</sup>Department of Environmental and Occupational Health, University of Nevada, Las Vegas, Nevada, USA

<sup>e</sup>Hong Kong Premium Services and Research Laboratory, Hong Kong, China

\*Corresponding Author: [judith.chow@dri.edu](mailto:judith.chow@dri.edu)

Table S1

Paired comparison of fresh vs. aged averaged peat combustion source profiles between 25% and 60% moisture content for Putnam County Lakebed, Florida peat

| Aging Time                                                                                                              | Average $\pm$ Standard Deviation of Percent PM <sub>2.5</sub> Mass |                   |                           |                     |
|-------------------------------------------------------------------------------------------------------------------------|--------------------------------------------------------------------|-------------------|---------------------------|---------------------|
|                                                                                                                         | Subtropical                                                        |                   |                           |                     |
|                                                                                                                         | Putnam County Lakebed, Florida                                     |                   |                           |                     |
|                                                                                                                         | 2 (25%) days                                                       |                   | 2 (60%) days              |                     |
|                                                                                                                         | Fresh 2                                                            | Aged 2            | Fresh 2                   | Aged 2              |
| Peat IDs in the average                                                                                                 | PEAT008, PEAT009                                                   |                   | PEAT042, PEAT043, PEAT044 |                     |
| Nitric Acid (HNO <sub>3</sub> )                                                                                         | 0.18 $\pm$ 0.033                                                   | 0.39 $\pm$ 0.17   | 0.30 $\pm$ 0.14           | 0.35 $\pm$ 0.12     |
| Ammonia (NH <sub>3</sub> )                                                                                              | 28.030 $\pm$ na                                                    | 4.76 $\pm$ 0.52   | 19.97 $\pm$ 1.22          | 7.64 $\pm$ 1.77     |
| Water-Soluble Sodium (Na <sup>+</sup> )                                                                                 | 0.015 $\pm$ 0.00033                                                | 4.060 $\pm$ 5.70  | 0.020 $\pm$ 0.0051        | 0.030 $\pm$ 0.014   |
| Water-Soluble Potassium (K <sup>+</sup> )                                                                               | 0.010 $\pm$ 0.015                                                  | na <sup>a</sup>   | 0.019 $\pm$ 0.0074        | na <sup>a</sup>     |
| Chloride (Cl <sup>-</sup> )                                                                                             | 0.14 $\pm$ 0.035                                                   | 0.18 $\pm$ 0.10   | 0.021 $\pm$ 0.035         | 0.10 $\pm$ 0.037    |
| Nitrite (NO <sub>2</sub> <sup>-</sup> )                                                                                 | 0.053 $\pm$ 0.071                                                  | 0.011 $\pm$ 0.015 | 0.013 $\pm$ 0.023         | 0.0012 $\pm$ 0.0013 |
| Nitrate (NO <sub>3</sub> <sup>-</sup> )                                                                                 | 0.16 $\pm$ 0.12                                                    | 0.87 $\pm$ 0.15   | 0.13 $\pm$ 0.093          | 0.48 $\pm$ 0.12     |
| Sulfate (SO <sub>4</sub> <sup>=</sup> )                                                                                 | 0.89 $\pm$ 0.97                                                    | 1.60 $\pm$ 1.33   | 0.17 $\pm$ 0.031          | 0.74 $\pm$ 0.032    |
| Ammonium (NH <sub>4</sub> <sup>+</sup> )                                                                                | 0.00070 $\pm$ 0.00099                                              | 0.052 $\pm$ 0.074 | 0.0028 $\pm$ 0.0012       | 0.39 $\pm$ 0.049    |
| OC1 (140 °C)                                                                                                            | 9.54 $\pm$ 2.50                                                    | 7.48 $\pm$ 3.12   | 11.93 $\pm$ 3.51          | 5.25 $\pm$ 0.79     |
| OC2 (280 °C)                                                                                                            | 21.66 $\pm$ 2.045                                                  | 19.50 $\pm$ 0.85  | 20.98 $\pm$ 0.40          | 15.66 $\pm$ 2.71    |
| OC3 (480 °C)                                                                                                            | 25.30 $\pm$ 7.61                                                   | 24.97 $\pm$ 0.95  | 29.42 $\pm$ 1.63          | 25.93 $\pm$ 3.050   |
| OC4 (580 °C)                                                                                                            | 7.60 $\pm$ 4.045                                                   | 7.76 $\pm$ 1.017  | 6.71 $\pm$ 1.35           | 7.61 $\pm$ 2.46     |
| Pyrolyzed Carbon                                                                                                        | 7.61 $\pm$ 1.80                                                    | 10.45 $\pm$ 1.14  | 12.90 $\pm$ 0.72          | 9.59 $\pm$ 2.18     |
| Organic Carbon (OC)                                                                                                     | 71.71 $\pm$ 9.40                                                   | 70.16 $\pm$ 5.033 | 81.94 $\pm$ 3.86          | 64.032 $\pm$ 7.51   |
| EC1 (580 °C)                                                                                                            | 7.61 $\pm$ 2.43                                                    | 9.58 $\pm$ 1.36   | 9.33 $\pm$ 0.85           | 8.19 $\pm$ 1.15     |
| EC2 (740 °C)                                                                                                            | 3.51 $\pm$ 2.51                                                    | 2.94 $\pm$ 2.34   | 6.38 $\pm$ 0.055          | 3.81 $\pm$ 1.010    |
| EC3 (840 °C)                                                                                                            | 0.00 $\pm$ 0.00                                                    | 0.00 $\pm$ 0.00   | 0.00 $\pm$ 0.00           | 0.00 $\pm$ 0.00     |
| Elemental Carbon (EC)                                                                                                   | 3.51 $\pm$ 1.72                                                    | 2.076 $\pm$ 0.16  | 2.80 $\pm$ 0.42           | 2.42 $\pm$ 2.43     |
| Total Carbon (TC)                                                                                                       | 75.23 $\pm$ 11.12                                                  | 72.24 $\pm$ 4.88  | 84.74 $\pm$ 4.26          | 66.45 $\pm$ 9.51    |
| Water-Soluble OC (WSOC)                                                                                                 | 19.53 $\pm$ 4.67                                                   | 22.71 $\pm$ 4.43  | 29.61 $\pm$ 14.67         | 23.75 $\pm$ 4.02    |
| Formate (CH <sub>2</sub> O <sub>2</sub> <sup>-</sup> )                                                                  | 0.11 $\pm$ 0.097                                                   | 0.20 $\pm$ 0.13   | 0.13 $\pm$ 0.049          | 0.27 $\pm$ 0.053    |
| Acetate (C <sub>2</sub> H <sub>4</sub> O <sub>2</sub> <sup>-</sup> )                                                    | 0.19 $\pm$ 0.15                                                    | 0.047 $\pm$ 0.011 | 0.57 $\pm$ 0.22           | 0.78 $\pm$ 0.34     |
| Oxalate (C <sub>2</sub> H <sub>2</sub> O <sub>4</sub> <sup>=</sup> )                                                    | 0.050 $\pm$ 0.070                                                  | 0.58 $\pm$ 0.26   | 0.38 $\pm$ 0.091          | 0.73 $\pm$ 0.070    |
| Propionate (C <sub>3</sub> H <sub>5</sub> O <sub>2</sub> <sup>-</sup> )                                                 | 0.00 $\pm$ 0.00                                                    | 0.00 $\pm$ 0.00   | 0.021 $\pm$ 0.019         | 0.021 $\pm$ 0.036   |
| Levogluconan (C <sub>6</sub> H <sub>10</sub> O <sub>5</sub> )                                                           | 3.15 $\pm$ 0.0092                                                  | 2.78 $\pm$ 0.041  | 3.79 $\pm$ 0.42           | 2.45 $\pm$ 0.22     |
| Mannosan (C <sub>6</sub> H <sub>10</sub> O <sub>5</sub> )                                                               | 0.00 $\pm$ 0.00                                                    | 0.00 $\pm$ 0.00   | 0.25 $\pm$ 0.42           | 0.29 $\pm$ 0.50     |
| Galactose/Maltitol<br>(C <sub>6</sub> H <sub>12</sub> O <sub>6</sub> /C <sub>12</sub> H <sub>24</sub> O <sub>11</sub> ) | 0.00 $\pm$ 0.00                                                    | 0.00 $\pm$ 0.00   | 0.00 $\pm$ 0.00           | 0.00 $\pm$ 0.00     |
| Glycerol (C <sub>3</sub> H <sub>8</sub> O <sub>3</sub> )                                                                | 0.00 $\pm$ 0.00                                                    | 0.00 $\pm$ 0.00   | 0.096 $\pm$ 0.11          | 0.00 $\pm$ 0.00     |
| Mannitol (C <sub>6</sub> H <sub>14</sub> O <sub>6</sub> )                                                               | 0.00 $\pm$ 0.00                                                    | 0.00 $\pm$ 0.00   | 0.00 $\pm$ 0.00           | 0.00 $\pm$ 0.00     |

|                 |               |              |              |             |
|-----------------|---------------|--------------|--------------|-------------|
| Aluminum (Al)   | 0.026 ± 0.059 | 0.069 ± 0.97 | 0.043 ± 0.49 | 0.13 ± 0.16 |
| Silicon (Si)    | 0.00 ± 0.00   | 0.021 ± 0.22 | 0.018 ± 0.30 | 0.14 ± 0.45 |
| Phosphorous (P) | 0.00 ± 0.00   | 0.00 ± 0.00  | 0.00 ± 0.00  | 0.00 ± 0.00 |

Table S1 (cont'd)

|                 |                   |                   |                   |                  |
|-----------------|-------------------|-------------------|-------------------|------------------|
| Sulfur (S)      | 0.19 ± 0.056      | 0.37 ± 0.24       | 0.13 ± 0.021      | 0.54 ± 0.019     |
| Chlorine (Cl)   | 0.12 ± 0.0064     | 0.067 ± 0.024     | 0.18 ± 0.028      | 0.079 ± 0.0082   |
| Potassium (K)   | 0.0092 ± 0.012    | 0.057 ± 0.035     | 0.22 ± 0.016      | 0.028 ± 0.0080   |
| Calcium (Ca)    | 0.0040 ± 0.0056   | 0.00 ± 0.00       | 0.013 ± 0.023     | 0.00 ± 0.00      |
| Scandium (Sc)   | 0.00 ± 0.00       | 0.00 ± 0.00       | 0.00 ± 0.00       | 0.00 ± 0.00      |
| Titanium (Ti)   | 0.0036 ± 0.0050   | 0.00 ± 0.00       | 0.00 ± 0.00       | 0.00 ± 0.00      |
| Vanadium (V)    | 0.00 ± 0.00       | 0.00 ± 0.00       | 0.00 ± 0.00       | 0.00 ± 0.00      |
| Chromium (Cr)   | 0.00 ± 0.00       | 0.00 ± 0.00       | 0.0011 ± 0.0016   | 0.016 ± 0.023    |
| Manganese (Mn)  | 0.0013 ± 0.0012   | 0.00033 ± 0.00047 | 0.0065 ± 0.0026   | 0.00077 ± 0.0011 |
| Iron (Fe)       | 0.00 ± 0.00       | 0.047 ± 0.040     | 0.038 ± 0.012     | 0.13 ± 0.12      |
| Cobalt (Co)     | 0.00 ± 0.00       | 0.00021 ± 0.00030 | 0.00 ± 0.00       | 0.00 ± 0.00      |
| Nickel (Ni)     | 0.00045 ± 0.00064 | 0.00 ± 0.00       | 0.00 ± 0.00       | 0.00 ± 0.00      |
| Copper (Cu)     | 0.00 ± 0.00       | 0.0035 ± 0.0049   | 0.036 ± 0.033     | 0.027 ± 0.024    |
| Zinc (Zn)       | 0.0013 ± 0.0015   | 0.0023 ± 0.0032   | 0.025 ± 0.021     | 0.026 ± 0.026    |
| Arsenic (As)    | 0.00 ± 0.00       | 0.00 ± 0.00       | 0.00 ± 0.00       | 0.00 ± 0.00      |
| Selenium (Se)   | 0.0017 ± 0.00092  | 0.00 ± 0.00       | 0.0020 ± 0.0024   | 0.0033 ± 0.0047  |
| Bromine (Br)    | 0.020 ± 0.00098   | 0.0077 ± 0.010    | 0.022 ± 0.0065    | 0.013 ± 0.0024   |
| Rubidium (Rb)   | 0.00011 ± 0.00016 | 0.00095 ± 0.0013  | 0.0012 ± 0.0018   | 0.0019 ± 0.0026  |
| Strontium (Sr)  | 0.0023 ± 0.00057  | 0.0038 ± 0.0013   | 0.0061 ± 0.0019   | 0.0042 ± 0.0026  |
| Yttrium (Y)     | 0.0014 ± 0.00029  | 0.0012 ± 0.0018   | 0.0030 ± 0.0041   | 0.0029 ± 0.0017  |
| Zirconium (Zr)  | 0.0016 ± 0.0023   | 0.0003 ± 0.00089  | 0.0042 ± 0.0046   | 0.0070 ± 0.0038  |
| Niobium (Nb)    | 0.0016 ± 0.0023   | 0.00082 ± 0.0012  | 0.0013 ± 0.0015   | 0.0013 ± 0.0019  |
| Molybdenum (Mo) | 0.00 ± 0.00       | 0.00063 ± 0.00089 | 0.0034 ± 0.0036   | 0.0013 ± 0.0019  |
| Silver (Ag)     | 0.0010 ± 0.0014   | 0.00 ± 0.00       | 0.00 ± 0.00       | 0.00 ± 0.00      |
| Cadmium (Cd)    | 0.0034 ± 0.0049   | 0.00 ± 0.00       | 0.00 ± 0.00       | 0.00 ± 0.00      |
| Indium (In)     | 0.00068 ± 0.00096 | 0.0025 ± 0.0036   | 0.0025 ± 0.0024   | 0.0038 ± 0.0054  |
| Tin (Sn)        | 0.0037 ± 0.00047  | 0.0034 ± 0.0048   | 0.00049 ± 0.00085 | 0.0066 ± 0.0093  |
| Antimony (Sb)   | 0.00 ± 0.00       | 0.0072 ± 0.010    | 0.0031 ± 0.0053   | 0.010 ± 0.014    |
| Cesium (Cs)     | 0.00 ± 0.00       | 0.00 ± 0.00       | 0.018 ± 0.029     | 0.0086 ± 0.012   |
| Barium (Ba)     | 0.00 ± 0.00       | 0.00 ± 0.00       | 0.013 ± 0.022     | 0.00 ± 0.00      |
| Lanthanum (La)  | 0.042 ± 0.044     | 0.0053 ± 0.0075   | 0.045 ± 0.039     | 0.010 ± 0.014    |
| Wolfram (W)     | 0.0037 ± 0.0018   | 0.0034 ± 0.0049   | 0.00010 ± 0.00018 | 0.0053 ± 0.0075  |
| Gold (Au)       | 0.00062 ± 0.00088 | 0.00 ± 0.00       | 0.0016 ± 0.0015   | 0.00 ± 0.00      |
| Mercury (Hg)    | 0.00020 ± 0.00028 | 0.0014 ± 0.0020   | 0.00 ± 0.00       | 0.00 ± 0.00      |
| Lead (Pb)       | 0.0015 ± 0.0021   | 0.0014 ± 0.000962 | 0.0038 ± 0.0063   | 0.0033 ± 0.00    |

|             |                     |                 |                     |                     |
|-------------|---------------------|-----------------|---------------------|---------------------|
| Uranium (U) | $0.0034 \pm 0.0044$ | $0.00 \pm 0.00$ | $0.0023 \pm 0.0040$ | $0.0036 \pm 0.0051$ |
|-------------|---------------------|-----------------|---------------------|---------------------|

<sup>a</sup>Water-soluble K<sup>+</sup> data were contaminated due to the use of potassium iodide denuder downstream of the oxidation flow reactor

Table S2

## Unpaired fresh or aged peat source profiles

| Peat Location                                                                                                        | Average $\pm$ Standard Deviation of Percent PM <sub>2.5</sub> Mass |                       |                                     |                       |                       |
|----------------------------------------------------------------------------------------------------------------------|--------------------------------------------------------------------|-----------------------|-------------------------------------|-----------------------|-----------------------|
|                                                                                                                      | Pskov, Siberia                                                     | Northern Alaska, USA  | Putnam County Lakebed, Florida, USA | Borneo, Malaysia      | Borneo, Malaysia      |
| Aging Time                                                                                                           | Fresh 2                                                            | Fresh 7               | Aged 7                              | Fresh 2               | Fresh 7               |
| Peat ID                                                                                                              | PEAT024                                                            | PEAT021               | PEAT004                             | PEAT037               | PEAT040- F7           |
| Nitric Acid (HNO <sub>3</sub> )                                                                                      | 0.25 $\pm$ 0.00026                                                 | 0.22 $\pm$ 0.00019    | 0.39 $\pm$ 0.00019                  | 0.21 $\pm$ 0.00019    | 0.28 $\pm$ 0.00018    |
| Ammonia (NH <sub>3</sub> )                                                                                           | 20.50 $\pm$ 0.0071                                                 | 8.86 $\pm$ 0.0028     | 1.84 $\pm$ 0.00055                  | 25.088 $\pm$ 0.0080   | 22.63 $\pm$ 0.0069    |
| Water-Soluble Sodium (Na <sup>+</sup> )                                                                              | 0.025 $\pm$ 0.00083                                                | 0.032 $\pm$ 0.00060   | 0.046 $\pm$ 0.00037                 | 0.013 $\pm$ 0.00060   | 0.012 $\pm$ 0.00048   |
| Water-Soluble Potassium (K <sup>+</sup> )                                                                            | 0.051 $\pm$ 0.000083                                               | 0.035 $\pm$ 0.000059  | na <sup>a</sup>                     | 0.027 $\pm$ 0.000056  | 0.036 $\pm$ 0.000051  |
| Chloride (Cl <sup>-</sup> )                                                                                          | 0.16 $\pm$ 0.00024                                                 | 0.21 $\pm$ 0.00019    | 0.10 $\pm$ 0.00011                  | 0.10 $\pm$ 0.00017    | 0.12 $\pm$ 0.00014    |
| Nitrite (NO <sub>2</sub> <sup>-</sup> )                                                                              | 0.00 $\pm$ 0.00040                                                 | 0.00 $\pm$ 0.00029    | 0.0011 $\pm$ 0.00018                | 0.00 $\pm$ 0.00029    | 0.0055 $\pm$ 0.00023  |
| Nitrate (NO <sub>3</sub> <sup>-</sup> )                                                                              | 0.087 $\pm$ 0.00048                                                | 0.097 $\pm$ 0.00035   | 2.038 $\pm$ 0.00099                 | 0.080 $\pm$ 0.00034   | 0.075 $\pm$ 0.00028   |
| Sulfate (SO <sub>4</sub> <sup>=</sup> )                                                                              | 0.63 $\pm$ 0.00044                                                 | 0.19 $\pm$ 0.00014    | 1.78 $\pm$ 0.0012                   | 0.25 $\pm$ 0.00018    | 0.17 $\pm$ 0.00012    |
| Ammonium (NH <sub>4</sub> <sup>+</sup> )                                                                             | 0.0024 $\pm$ 0.00012                                               | 0.0017 $\pm$ 0.000086 | 1.60 $\pm$ 0.0012                   | 0.0017 $\pm$ 0.000086 | 0.0021 $\pm$ 0.000069 |
| OC1 (140°C)                                                                                                          | 11.36 $\pm$ 0.028                                                  | 15.22 $\pm$ 0.038     | 8.61 $\pm$ 0.021                    | 11.26 $\pm$ 0.028     | 12.92 $\pm$ 0.032     |
| OC2 (280°C)                                                                                                          | 20.84 $\pm$ 0.013                                                  | 15.56 $\pm$ 0.0094    | 21.65 $\pm$ 0.012                   | 24.48 $\pm$ 0.014     | 24.47 $\pm$ 0.014     |
| OC3 (480°C)                                                                                                          | 28.60 $\pm$ 0.022                                                  | 24.19 $\pm$ 0.018     | 27.92 $\pm$ 0.021                   | 29.83 $\pm$ 0.022     | 27.041 $\pm$ 0.020    |
| OC4 (590°C)                                                                                                          | 9.29 $\pm$ 0.0083                                                  | 4.27 $\pm$ 0.0038     | 6.75 $\pm$ 0.0059                   | 9.17 $\pm$ 0.0081     | 8.090 $\pm$ 0.0071    |
| Pyrolyzed Carbon                                                                                                     | 13.04 $\pm$ 0.021                                                  | 12.18 $\pm$ 0.019     | 11.58 $\pm$ 0.018                   | 9.71 $\pm$ 0.015      | 8.90 $\pm$ 0.014      |
| Organic Carbon (OC)                                                                                                  | 83.13 $\pm$ 0.046                                                  | 71.42 $\pm$ 0.038     | 76.52 $\pm$ 0.040                   | 84.45 $\pm$ 0.045     | 81.41 $\pm$ 0.043     |
| EC1 (580°C)                                                                                                          | 6.47 $\pm$ 0.014                                                   | 7.043 $\pm$ 0.016     | 12.061 $\pm$ 0.026                  | 7.11 $\pm$ 0.016      | 6.14 $\pm$ 0.014      |
| EC2 (740°C)                                                                                                          | 6.95 $\pm$ 0.0077                                                  | 5.13 $\pm$ 0.0056     | 2.15 $\pm$ 0.0024                   | 4.17 $\pm$ 0.0046     | 4.88 $\pm$ 0.0053     |
| EC3 (840°C)                                                                                                          | 0.00 $\pm$ 0.00028                                                 | 0.00 $\pm$ 0.00021    | 0.00 $\pm$ 0.00013                  | 0.00 $\pm$ 0.00020    | 0.00 $\pm$ 0.00016    |
| Elemental Carbon (EC)                                                                                                | 0.38 $\pm$ 0.0017                                                  | 0.00 $\pm$ 0.0011     | 2.63 $\pm$ 0.0038                   | 1.56 $\pm$ 0.0025     | 2.12 $\pm$ 0.0031     |
| Total Carbon (TC)                                                                                                    | 83.51 $\pm$ 0.044                                                  | 71.42 $\pm$ 0.036     | 79.15 $\pm$ 0.039                   | 86.012 $\pm$ 0.043    | 83.54 $\pm$ 0.041     |
| Water-Soluble OC                                                                                                     | 28.17 $\pm$ 0.038                                                  | 31.49 $\pm$ 0.042     | 26.04 $\pm$ 0.035                   | 17.14 $\pm$ 0.023     | 15.90 $\pm$ 0.021     |
| Formate (CH <sub>2</sub> O <sub>2</sub> <sup>-</sup> )                                                               | 0.047 $\pm$ 0.000069                                               | 0.074 $\pm$ 0.00011   | 0.19 $\pm$ 0.00028                  | 0.14 $\pm$ 0.00021    | 0.11 $\pm$ 0.00016    |
| Acetate (C <sub>2</sub> H <sub>4</sub> O <sub>2</sub> <sup>-</sup> )                                                 | 0.28 $\pm$ 0.00034                                                 | 0.41 $\pm$ 0.00049    | 0.25 $\pm$ 0.00030                  | 0.47 $\pm$ 0.00057    | 0.32 $\pm$ 0.00039    |
| Oxalate (C <sub>2</sub> H <sub>2</sub> O <sub>4</sub> <sup>=</sup> )                                                 | 0.00 $\pm$ 0.00                                                    | 0.00 $\pm$ 0.00       | 1.45 $\pm$ 0.0022                   | 0.27 $\pm$ 0.00041    | 0.33 $\pm$ 0.00049    |
| Propionate (C <sub>3</sub> H <sub>5</sub> O <sub>2</sub> <sup>-</sup> )                                              | 0.050 $\pm$ 0.00020                                                | 0.00 $\pm$ 0.00014    | 0.00 $\pm$ 0.000088                 | 0.00 $\pm$ 0.00014    | 0.020 $\pm$ 0.00011   |
| Levoglucosan (C <sub>6</sub> H <sub>10</sub> O <sub>5</sub> )                                                        | 6.17 $\pm$ 0.015                                                   | 11.82 $\pm$ 0.029     | 2.40 $\pm$ 0.0059                   | 4.084 $\pm$ 0.010     | 5.66 $\pm$ 0.014      |
| Mannosan (C <sub>6</sub> H <sub>10</sub> O <sub>5</sub> )                                                            | 0.00 $\pm$ 0.00043                                                 | 5.32 $\pm$ 0.016      | 0.00 $\pm$ 0.00019                  | 0.00 $\pm$ 0.00031    | 1.27 $\pm$ 0.0081     |
| Galactose/Maltitol (C <sub>6</sub> H <sub>12</sub> O <sub>6</sub> /C <sub>12</sub> H <sub>24</sub> O <sub>11</sub> ) | 0.00 $\pm$ 0.00022                                                 | 0.00 $\pm$ 0.00016    | 0.00 $\pm$ 0.000099                 | 0.00 $\pm$ 0.00016    | 0.00 $\pm$ 0.00013    |
| Glycerol (C <sub>3</sub> H <sub>8</sub> O <sub>3</sub> )                                                             | 0.00 $\pm$ 0.0000040                                               | 0.00 $\pm$ 0.0000029  | 0.00 $\pm$ 0.0000018                | 0.00 $\pm$ 0.0000029  | 0.00 $\pm$ 0.0000023  |
| Mannitol (C <sub>6</sub> H <sub>14</sub> O <sub>6</sub> )                                                            | 0.00 $\pm$ 0.000079                                                | 0.00 $\pm$ 0.000057   | 0.00 $\pm$ 0.000035                 | 0.00 $\pm$ 0.000057   | 0.00 $\pm$ 0.000046   |

|                 |                |                 |                 |                 |                 |
|-----------------|----------------|-----------------|-----------------|-----------------|-----------------|
| Aluminum (Al)   | 0.00 ± 0.052   | 0.053 ± 0.038   | na <sup>b</sup> | 0.074 ± 0.038   | 0.016 ± 0.030   |
| Silicon (Si)    | 0.00 ± 0.0061  | 0.043 ± 0.0045  | na <sup>b</sup> | 0.0071 ± 0.0045 | 0.0023 ± 0.0036 |
| Phosphorous (P) | 0.00 ± 0.00012 | 0.00 ± 0.000089 | na <sup>b</sup> | 0.00 ± 0.000088 | 0.00 ± 0.000071 |

Table S2 (cont'd)

|                 |                   |                   |                 |                     |                    |
|-----------------|-------------------|-------------------|-----------------|---------------------|--------------------|
| Sulfur (S)      | 0.00 ± 0.000065   | 0.094 ± 0.000058  | na <sup>b</sup> | 0.097 ± 0.000058    | 0.091 ± 0.000048   |
| Chlorine (Cl)   | 0.12 ± 0.000064   | 0.15 ± 0.000060   | na <sup>b</sup> | 0.082 ± 0.000043    | 0.12 ± 0.000046    |
| Potassium (K)   | 0.047 ± 0.00017   | 0.11 ± 0.00013    | na <sup>b</sup> | 0.026 ± 0.00013     | 0.027 ± 0.00010    |
| Calcium (Ca)    | 0.00 ± 0.00065    | 0.010 ± 0.00047   | na <sup>b</sup> | 0.00 ± 0.00046      | 0.00 ± 0.00037     |
| Scandium (Sc)   | 0.00 ± 0.0029     | 0.00 ± 0.0021     | na <sup>b</sup> | 0.00 ± 0.0021       | 0.00 ± 0.0017      |
| Titanium (Ti)   | 0.00 ± 0.00010    | 0.030 ± 0.000075  | na <sup>b</sup> | 0.016 ± 0.000074    | 0.013 ± 0.000060   |
| Vanadium (V)    | 0.00 ± 0.000019   | 0.00 ± 0.000014   | na <sup>b</sup> | 0.00 ± 0.000014     | 0.00 ± 0.000011    |
| Chromium (Cr)   | 0.00 ± 0.000065   | 0.025 ± 0.000047  | na <sup>b</sup> | 0.00 ± 0.000046     | 0.00 ± 0.000037    |
| Manganese (Mn)  | 0.00 ± 0.00023    | 0.015 ± 0.00016   | na <sup>b</sup> | 0.012 ± 0.00016     | 0.0083 ± 0.00013   |
| Iron (Fe)       | 0.00 ± 0.00039    | 0.24 ± 0.00030    | na <sup>b</sup> | 0.041 ± 0.00028     | 0.014 ± 0.00023    |
| Cobalt (Co)     | 0.00 ± 0.000013   | 0.00 ± 0.0000093  | na <sup>b</sup> | 0.00010 ± 0.0000092 | 0.00 ± 0.0000074   |
| Nickel (Ni)     | 0.0006 ± 0.000032 | 0.0070 ± 0.000023 | na <sup>b</sup> | 0.00010 ± 0.000023  | 0.00030 ± 0.000019 |
| Copper (Cu)     | 0.00 ± 0.00020    | 0.0051 ± 0.00015  | na <sup>b</sup> | 0.00 ± 0.00014      | 0.0035 ± 0.00012   |
| Zinc (Zn)       | 0.0024 ± 0.00011  | 0.0054 ± 0.000079 | na <sup>b</sup> | 0.0021 ± 0.000079   | 0.0077 ± 0.000063  |
| Arsenic (As)    | 0.0031 ± 0.000051 | 0.00 ± 0.000037   | na <sup>b</sup> | 0.00 ± 0.000037     | 0.00 ± 0.000030    |
| Selenium (Se)   | 0.0014 ± 0.000090 | 0.00 ± 0.000065   | na <sup>b</sup> | 0.00 ± 0.000065     | 0.00 ± 0.000052    |
| Bromine (Br)    | 0.0036 ± 0.000026 | 0.0030 ± 0.000019 | na <sup>b</sup> | 0.013 ± 0.000019    | 0.0089 ± 0.000015  |
| Rubidium (Rb)   | 0.00 ± 0.000032   | 0.00 ± 0.000023   | na <sup>b</sup> | 0.00080 ± 0.000023  | 0.0014 ± 0.000019  |
| Strontium (Sr)  | 0.0041 ± 0.000032 | 0.0036 ± 0.000023 | na <sup>b</sup> | 0.0049 ± 0.000023   | 0.0045 ± 0.000019  |
| Yttrium (Y)     | 0.00 ± 0.000032   | 0.0083 ± 0.000023 | na <sup>b</sup> | 0.00 ± 0.000023     | 0.00010 ± 0.000019 |
| Zirconium (Zr)  | 0.0041 ± 0.00012  | 0.0020 ± 0.000089 | na <sup>b</sup> | 0.0062 ± 0.000088   | 0.0040 ± 0.000071  |
| Niobium (Nb)    | 0.00 ± 0.000058   | 0.00 ± 0.000042   | na <sup>b</sup> | 0.00 ± 0.000042     | 0.00030 ± 0.000034 |
| Molybdenum (Mo) | 0.0027 ± 0.00012  | 0.00 ± 0.000089   | na <sup>b</sup> | 0.00 ± 0.000088     | 0.0010 ± 0.000071  |
| Silver (Ag)     | 0.00 ± 0.00015    | 0.00 ± 0.00011    | na <sup>b</sup> | 0.00 ± 0.00011      | 0.00 ± 0.000089    |
| Cadmium (Cd)    | 0.00 ± 0.00021    | 0.00 ± 0.00015    | na <sup>b</sup> | 0.00 ± 0.00015      | 0.00 ± 0.00012     |
| Indium (In)     | 0.015 ± 0.00015   | 0.00 ± 0.00011    | na <sup>b</sup> | 0.00 ± 0.00011      | 0.0026 ± 0.000086  |
| Tin (Sn)        | 0.0021 ± 0.00027  | 0.00 ± 0.00020    | na <sup>b</sup> | 0.018 ± 0.00019     | 0.011 ± 0.00016    |
| Antimony (Sb)   | 0.00 ± 0.00041    | 0.00 ± 0.00029    | na <sup>b</sup> | 0.00 ± 0.00029      | 0.0061 ± 0.00023   |
| Cesium (Cs)     | 0.00 ± 0.0011     | 0.00 ± 0.00082    | na <sup>b</sup> | 0.045 ± 0.00082     | 0.00 ± 0.00066     |
| Barium (Ba)     | 0.00 ± 0.00085    | 0.00 ± 0.00062    | na <sup>b</sup> | 0.00 ± 0.00061      | 0.00 ± 0.00049     |
| Lanthanum (La)  | 0.16 ± 0.0017     | 0.00 ± 0.0012     | na <sup>b</sup> | 0.00 ± 0.0012       | 0.00 ± 0.00097     |
| Wolfram (W)     | 0.00 ± 0.00033    | 0.0056 ± 0.00024  | na <sup>b</sup> | 0.00 ± 0.00024      | 0.016 ± 0.00019    |
| Gold (Au)       | 0.0011 ± 0.000097 | 0.00 ± 0.000070   | na <sup>b</sup> | 0.00 ± 0.000070     | 0.00 ± 0.000056    |
| Mercury (Hg)    | 0.00 ± 0.000051   | 0.00 ± 0.000037   | na <sup>b</sup> | 0.00 ± 0.000037     | 0.00 ± 0.000030    |
| Lead (Pb)       | 0.00 ± 0.000097   | 0.00 ± 0.000070   | na <sup>b</sup> | 0.00 ± 0.000070     | 0.00 ± 0.000056    |

|             |                     |                      |                 |                      |                      |
|-------------|---------------------|----------------------|-----------------|----------------------|----------------------|
| Uranium (U) | $0.017 \pm 0.00017$ | $0.0038 \pm 0.00013$ | na <sup>b</sup> | $0.0012 \pm 0.00013$ | $0.0044 \pm 0.00010$ |
|-------------|---------------------|----------------------|-----------------|----------------------|----------------------|

<sup>a</sup>Water-soluble K<sup>+</sup> data were contaminated due to the use of potassium iodide denuder downstream of the oxidation flow reactor

<sup>b</sup>Data not available due to the lack of elemental measurements from x-ray fluorescence analysis

Table S3

Equivalence measures<sup>a</sup> for paired fresh and aged source profiles for the Putnam County Lakebed and Everglades National Park, Florida peats. Highlighted *P*-values indicate statistically significant differences.

| Putnam County Lakebed (FL1) vs. Everglades National Park (FL2) |                                |                |                |              |                                      |                        |                 |                 |
|----------------------------------------------------------------|--------------------------------|----------------|----------------|--------------|--------------------------------------|------------------------|-----------------|-----------------|
| Paired Comparison <sup>b</sup>                                 | R/U Ratio Percent Distribution |                |                |              | Correlation Coefficient ( <i>r</i> ) | Student <i>t</i> -Test | df <sup>c</sup> | <i>P</i> -value |
|                                                                | < 1 $\sigma$                   | 1 - 2 $\sigma$ | 2 - 3 $\sigma$ | > 3 $\sigma$ |                                      |                        |                 |                 |
| FL1 Fresh 2 vs. FL2 Fresh 2                                    | 82.26%                         | 16.13%         | 0.81%          | 0.81%        | 0.996                                | Paired                 | 126             | 0.0000          |
| FL1 Fresh 7 vs. FL2 Fresh 7                                    | 59.20%                         | 18.40%         | 16.80%         | 5.60%        | 0.998                                | Paired                 | 126             | 0.0000          |
| FL1 Aged 2 vs. FL2 Aged 2                                      | 92.00%                         | 6.40%          | 0.80%          | 0.80%        | 0.998                                | Paired                 | 126             | 0.0006          |
| FL1 Aged 7 vs. FL2 Aged 7                                      | 60.32%                         | 15.87%         | 17.46%         | 6.35%        | 0.994                                | Paired                 | 126             | 0.0015          |

| FL1 and FL2 combined           |                                |                |                |                 |                                      |                        |                 |                 |
|--------------------------------|--------------------------------|----------------|----------------|-----------------|--------------------------------------|------------------------|-----------------|-----------------|
| Paired Comparison <sup>d</sup> | R/U Ratio Percent Distribution |                |                |                 | Correlation Coefficient ( <i>r</i> ) | Student <i>t</i> -Test | df <sup>c</sup> | <i>P</i> -value |
|                                | < 1 $\sigma$                   | 1 - 2 $\sigma$ | 2 - 3 $\sigma$ | $\geq 3 \sigma$ |                                      |                        |                 |                 |
| All Fresh 2 vs. All Aged 2     | 92.86%                         | 6.35%          | 0.79%          | 0.00%           | 0.992                                | Paired                 | 126             | 0.0000          |
| All Fresh 7 vs. All Aged 7     | 73.02%                         | 23.81%         | 2.38%          | 0.79%           | 0.974                                | Paired                 | 126             | 0.0002          |
| All Fresh 2 vs. All Fresh 7    | 98.41%                         | 1.59%          | 0.00%          | 0.00%           | 0.997                                | Paired                 | 126             | 0.5234          |
| All Aged 2 vs. All Aged 7      | 93.65%                         | 6.35%          | 0.00%          | 0.00%           | 0.998                                | Paired                 | 126             | 0.0019          |
| All Fresh vs. All Aged         | 92.86%                         | 7.14%          | 0.00%          | 0.00%           | 0.985                                | Paired                 | 126             | 0.0001          |

<sup>a</sup>For the *t*-test, a cutoff probability level of 5% is selected; if  $P < 0.05$ , there is a 95% probability that the two profiles are different. For correlations,  $r > 0.8$  suggests similar profiles,  $0.5 < r < 0.8$  indicates a moderate similarity, and  $r < 0.5$  denotes little or no similarity. The *R/U* ratio indicates the percentage of the >93 reported chemical abundances differ by more than an expected number of uncertainty intervals. The normal probability density function of 68%, 95.5%, and 99.7% for  $\pm 1\sigma$ ,  $\pm 2\sigma$ , and  $\pm 3\sigma$ , respectively, is used to evaluate the *R/U* ratios. The two profiles are considered to be similar, within the uncertainties of the chemical abundances when 80% of the *R/U* ratios are within  $\pm 3\sigma$ , with  $r > 0.8$  and  $P > 0.05$ . Species with *R/U* ratios  $> 3\sigma$  are further examined as these may be markers that further allow source contributions to be distinguished by receptor measurements. They may also reflect the sampling and analysis artifacts that are not representative of the larger population of source profiles.

<sup>b</sup>Includes two paired samples for 2- and 7-days of atmospheric aging.

<sup>c</sup>Degree of freedom

<sup>d</sup>"All Fresh 2" includes fresh, unaged profiles from both Putnam (FL1) and Everglades (FL2) peats for the 2-days experiment (same as "All Fresh 7" for the 7-days experiment); "All Aged 2" includes 2-day aged profiles from both Putnam (FL1) and Everglades (FL2) peats, downstream of the oxidation flow reactor for the 2-days aging experiment (same as "All Aged 7" for the 7-days aging experiment); "All Fresh" includes combined Putnam (FL1) and Everglades (FL2) Fresh 2 and Fresh 7 peats (same as "All Aged" for Aged 2 and Aged 7 peats).



Table S4

Summary of Student *t*-tests for fresh vs. aged peat combustion source profiles for PM<sub>2.5</sub> mass ( $\mu\text{g m}^{-3}$ ).

| Paired Comparison                   | n1 <sup>a</sup> | n2 <sup>a</sup> | Student <i>t</i> -Test | df <sup>b</sup> | <i>P</i> -value <sup>c</sup> |
|-------------------------------------|-----------------|-----------------|------------------------|-----------------|------------------------------|
| All Fresh vs. All Aged <sup>d</sup> | 32              | 32              | paired                 | 31              | 0.504                        |
| Fresh2 vs. Aged2                    | 17              | 17              | paired                 | 16              | 0.043                        |
| Fresh7 vs. Aged7                    | 15              | 15              | paired                 | 14              | 0.041                        |
| Fresh2 vs. Fresh7                   | 17              | 15              | 2 sample               | 30              | 0.712                        |
| Aged2 vs. Aged7                     | 17              | 15              | 2 sample               | 30              | 0.272                        |

<sup>a</sup>Includes 17 and 15 paired fresh and aged profiles for 2- and 7-days of atmospheric aging, respectively.

<sup>b</sup>Degree of freedom

<sup>c</sup>Student *t*-tests, a cutoff probability level of 5% is selected. The highlighted *P*-value denotes that  $P < 0.05$  and there is a 95% probability that two profiles are different.

<sup>d</sup>"All Fresh" includes both Fresh 2 and Fresh 7 profiles; and "All Aged" includes both Aged 2 and Aged 7 profiles.

Table S5

Percent (%) of PM<sub>2.5</sub> mass explained by the sum of measured species for the six peats

| Type of Peat                           | (Sum of Species <sup>a</sup> /Mass) x 100% |             |             |             |
|----------------------------------------|--------------------------------------------|-------------|-------------|-------------|
|                                        | Fresh 2                                    | Aged 2      | Fresh 7     | Aged 7      |
| Odintsovo, Russia                      | 62.2 ± 1.8                                 | 52.3 ± 6.1  | 63.5 ± 5.0  | 50.2 ± 7.7  |
| Pskov, Siberia                         | 79.1 ± 5.6                                 | 75.9 ± 13.4 | 83.7 ± 10.4 | 72.8 ± 13.4 |
| Northern Alaska, USA                   | 82.8 ± 6.5                                 | 76.7 ± 9.3  | 75.5 ± 21.3 | 63.3 ± 5.3  |
| Putnam County Lakebed, Florida, USA    | 80.3 ± 17.5                                | 79.3 ± 2.5  | 69.8 ± 4.7  | 73.4 ± 5.0  |
| Everglades National Park, Florida, USA | 89.8 ± 28.1                                | 73.0 ± 10.1 | 88.4 ± 7.2  | 69.0 ± 4.4  |
| Borneo, Malaysia                       | 80.9 ± 3.6                                 | 79.5 ± 18.8 | 83.1 ± 1.3  | 70.2 ± 9.0  |
| Average ± SD                           | 79.2 ± 10.5                                | 72.8 ± 10.0 | 77.3 ± 8.3  | 66.5 ± 7.5  |

<sup>a</sup>Sum of species includes 51 elements, water-soluble Na<sup>+</sup>, NH<sub>4</sub><sup>+</sup>, NO<sub>2</sub><sup>-</sup>, NO<sub>3</sub><sup>-</sup>, SO<sub>4</sub><sup>2-</sup>, OC, and EC. Water-soluble Cl<sup>-</sup> and K<sup>+</sup> by ion chromatography are not included because of the inclusion of Cl and K measured by x-ray fluorescence, respectively, to avoid double counting.

Table S6

Equivalence measures<sup>a</sup> for 25 and 60% fuel moisture content source profiles for the Putnam County Lakebed, Florida peat. Highlighted *P*-values indicate statistically significant differences.

| Paired Comparison <sup>b</sup> | Percent Distribution |                |                |                 | Correlation Coefficient ( <i>r</i> ) | Student <i>t</i> -Test | df <sup>c</sup> | <i>P</i> -value |
|--------------------------------|----------------------|----------------|----------------|-----------------|--------------------------------------|------------------------|-----------------|-----------------|
|                                | < 1 $\sigma$         | 1 - 2 $\sigma$ | 2 - 3 $\sigma$ | $\geq 3 \sigma$ |                                      |                        |                 |                 |
| FL25 Fresh2 vs. FL60 Fresh2    | 73.39%               | 16.13%         | 4.03%          | 6.45%           | 0.997                                | Paired                 | 126             | 0.00000021      |
| FL25 Aged2 vs. FL60 Aged2      | 88.80%               | 6.40%          | 2.40%          | 2.40%           | 0.999                                | Paired                 | 126             | 0.00020671      |
| All Fresh vs. All Aged         | 79.37%               | 19.84%         | 0.00%          | 0.79%           | 0.998                                | Paired                 | 126             | 0.00000243      |

<sup>a</sup>For the *t*-test, a cutoff probability level of 5% is selected; if  $P < 0.05$ , there is a 95% probability that the two profiles are different. For correlations,  $r > 0.8$  suggests similar profiles,  $0.5 < r < 0.8$  indicates a moderate similarity, and  $r < 0.5$  denotes little or no similarity. The *R/U* ratio indicates the percentage of the >93 reported chemical abundances differ by more than an expected number of uncertainty intervals. The normal probability density function of 68%, 95.5%, and 99.7% for  $\pm 1 \sigma$ ,  $\pm 2 \sigma$ , and  $\pm 3 \sigma$ , respectively, is used to evaluate the *R/U* ratios. The two profiles are considered to be similar, within the uncertainties of the chemical abundances when 80% of the *R/U* ratios are within  $\pm 3 \sigma$ , with  $r > 0.8$  and  $P > 0.05$ . Species with *R/U* ratios  $> 3 \sigma$  are further examined as these may be markers that further allow source contributions to be distinguished by receptor measurements. They may also reflect the sampling and analysis artifacts that are not representative of the larger population of source profiles.

<sup>b</sup>FL25 and FL60 denotes peats with 25% and 60% fuel moisture contents; "All Fresh" and "All Aged" includes both 25% and 60% fuel moisture content peats for the Fresh vs. Aged comparison with 2-day aging times.

<sup>c</sup>Degree of freedom

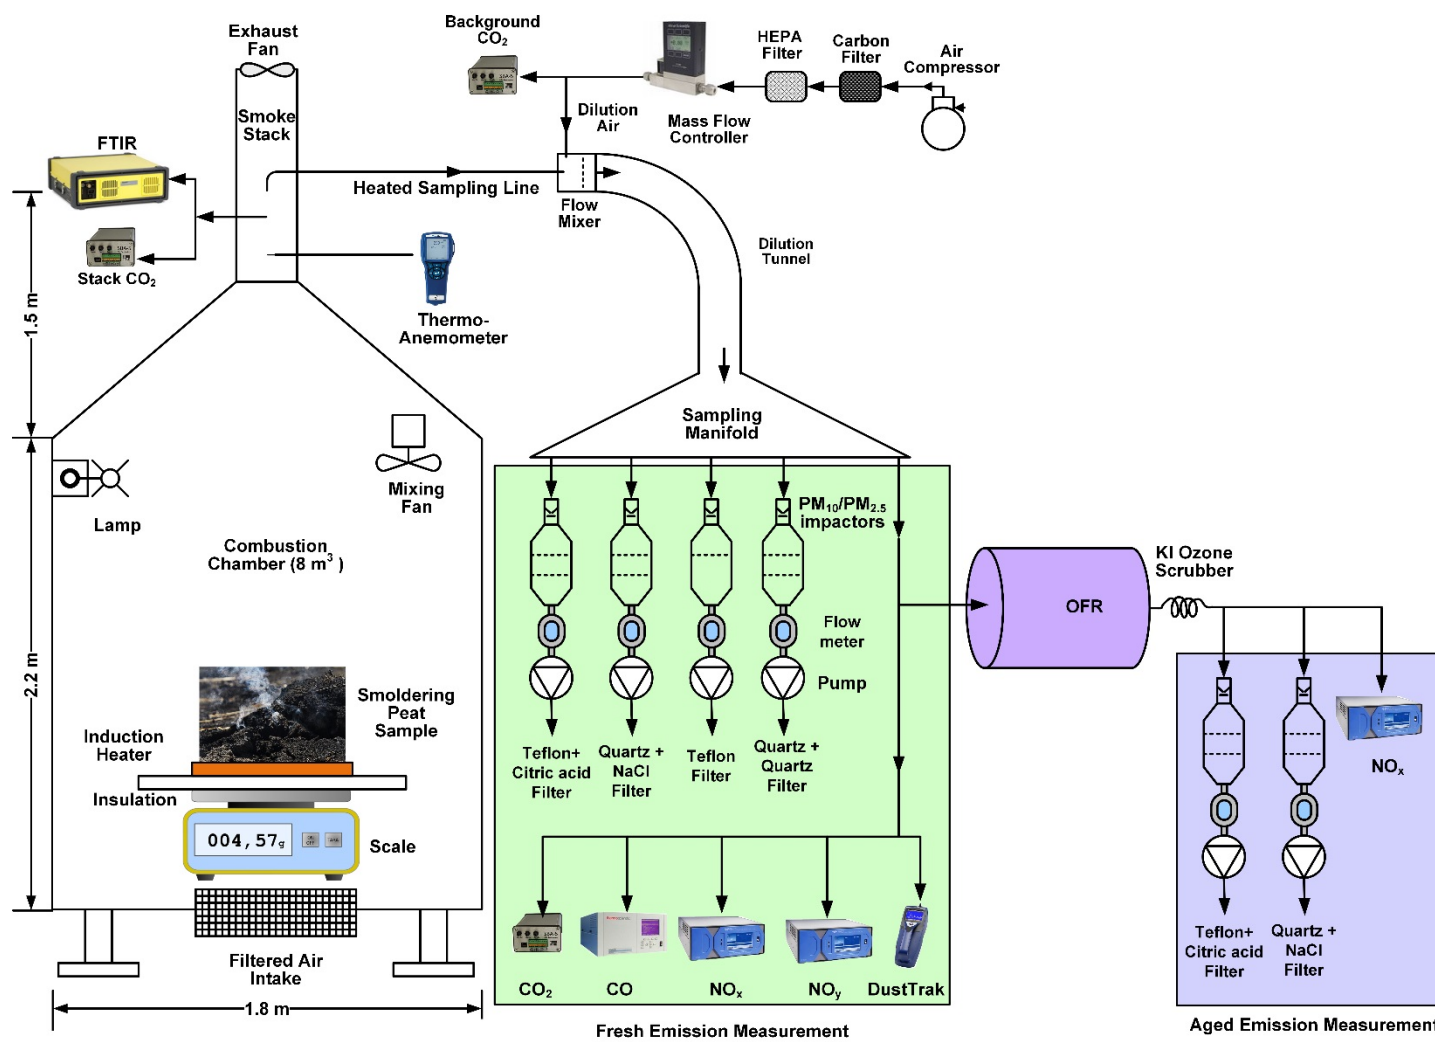

Figure S1. Configuration of peat combustion experimental set up. (FTIR: Fourier-transform infrared spectrometer; OFR: oxidation flow reactor; OFR lamps were operated at 2 and 3.5 volts to simulate aging of ~2 and 6.79 days, respectively) (Watson et al., 2019).
