# Supplementary material for: Changes in PM 2.5 Peat Combustion Source Profiles with Atmospheric Aging in an Oxidation Flow Reactor
Source: Copernicus journal article supplement (doi:10.5194/amt-2019-198), 2019-05-29
Supplement: Supplementary file [file amt-2019-198-AC1-supplement.zip]

1 Changes in PM<sub>2.5</sub> Peat Combustion Source Profiles with  
2 Atmospheric Aging in an Oxidation Flow Reactor  
3  
4

5 Judith C. Chow<sup>1,2\*</sup>, Junji Cao<sup>2,3</sup>, L.-W. Antony Chen<sup>4</sup>, Xiaoliang Wang<sup>1</sup>, Qiyuan Wang<sup>2,3</sup>, Jie  
6 Tian<sup>2,3</sup>, Steven Sai Hang Ho<sup>1,5</sup>, Adam C. Watts<sup>1</sup>, Tessa B. Carlson<sup>1</sup>, Steven D. Kohl<sup>1</sup>, John G.  
7 Watson<sup>1,2</sup>  
8

9 <sup>1</sup>Division of Atmospheric Sciences, Desert Research Institute, Reno, Nevada, USA

10 <sup>2</sup>Key Laboratory of Aerosol Chemistry and Physics, Institute of Earth Environment, Chinese  
11 Academy of Sciences, Xi'an, 710061, China.

12 <sup>3</sup>CAS Center for Excellence in Quaternary Science and Global Change, Xi'an, 710061, China

13 <sup>4</sup>Department of Environmental and Occupational Health, University of Nevada, Las Vegas,  
14 Nevada, USA

15 <sup>5</sup>Hong Kong Premium Services and Research Laboratory, Hong Kong, China  
16

17 Revised and resubmitted to

18 Atmospheric Measurement Techniques Discussion

19 Date

20 19 August 2019  
21  
22

23 \*Corresponding Author: [judith.chow@dri.edu](mailto:judith.chow@dri.edu)

24 **Abstract**

25 Smoke from laboratory chamber burning of peat fuels from Russia, Siberia, U.S.A. (Alaska  
26 and Florida), and Malaysia representing boreal, temperate, subtropical, and tropical regions was  
27 sampled before and after passing through a potential aerosol mass-oxidation flow reactor (PAM-  
28 OFR) to simulate intermediate-aged (~2 days) and well-aged (~7 days) source profiles. Species  
29 abundances in PM<sub>2.5</sub> between aged and fresh profiles varied by several orders of magnitude with  
30 two distinguishable clusters, centered around 0.1% for reactive and ionic species and centered  
31 around 10 % for carbon.

32 Organic carbon (OC) accounted for 58–85 % of PM<sub>2.5</sub> mass in fresh profiles with low EC  
33 abundances (0.67–4.4 %). OC abundances decreased by 20–33 % for well-aged profiles, with  
34 reductions of 3–14 % for the volatile OC fractions (e.g., OC1 and OC2, thermally evolved at 140  
35 and 280 °C). Ratios of organic matter (OM) to OC abundances increased by 12–19 % from  
36 intermediate- to well-aged smoke. Ammonia (NH<sub>3</sub>) to PM<sub>2.5</sub> ratios decreased after intermediate  
37 aging.

38 Well-aged NH<sub>4</sub><sup>+</sup> and NO<sub>3</sub><sup>-</sup> abundances increased to 7–8 % of PM<sub>2.5</sub> mass, associated with  
39 decreases in NH<sub>3</sub>, low temperature OC, and levoglucosan abundances for Siberia, Alaska, and  
40 Everglades (Florida) peats. Elevated levoglucosan was found for Russian peats, accounting for  
41 35–39 % and 20–25 % of PM<sub>2.5</sub> mass for fresh and aged profiles, respectively. The water-soluble  
42 organic carbon (WSOC) fractions of PM<sub>2.5</sub> were over two-fold higher in fresh Russian (37.0 ± 2.7  
43 %) than in Malaysian (14.6 ± 0.9 %) peats. While Russian peat OC emissions were largely water-  
44 soluble, Malaysian peat emissions were mostly water-insoluble, with WSOC/OC ratios of 0.59–  
45 0.71 and 0.18–0.40, respectively.

46 This study shows significant differences between fresh and aged peat combustion profiles  
47 among the four biomes that can be used to establish speciated emission inventories for atmospheric  
48 modeling and receptor model source apportionment. A sufficient aging time (~one week) is  
49 needed to allow gas-to-particle partitioning of semi-volatilized species, gas-phase oxidation, and  
50 particle volatilization to achieve representative source profiles for regional-scale source  
51 apportionment.

52

53 Keywords: fresh and aged source profiles, atmospheric aging, organic mass, organic carbon,  
54 levoglucosan, oxidation flow reactor (OFR)

## 55 **1 Introduction**

56 Receptor-oriented source-apportionment models have played a major role in establishing  
57 the weight of evidence (U.S.EPA, 2007) for pollution control decisions. These models,  
58 particularly the different solutions (Watson et al., 2016) to the Chemical Mass Balance (CMB)  
59 equations (Hidy and Friedlander, 1971), rely on patterns of chemical abundances in different  
60 source types that can be separated from each other when superimposed in ambient samples of  
61 volatile organic compounds (VOC) and suspended particulate matter (PM). These patterns, termed  
62 “source profiles,” have been measured in diluted exhaust emissions and resuspended mineral dusts  
63 for a variety of representative emitters. Many of these source profiles are compiled in country-  
64 specific source profile data bases (Cao, 2018; CARB, 2019; Liu et al., 2017; Mo et al., 2016;  
65 Pernigotti et al., 2016; U.S.EPA, 2019) and have been widely used for source apportionment and  
66 speciated emission inventories.

67 Chemical profiles measured at the source have been sufficient to identify and quantify  
68 nearby, and reasonably fresh, source contributions. These source types include gasoline- and  
69 diesel-engine exhaust, biomass burning, cooking, industrial processes, and fugitive dust. Ambient  
70 VOC and PM concentrations have been reduced as a result of control measures applied to these  
71 sources, and additional reductions have been implemented for toxic materials such as lead, nickel,  
72 vanadium, arsenic, diesel particulate matter, and several organic compounds. As these fresh  
73 emission contributions in neighborhood- and urban-scale environments (Chow et al., 2002)  
74 decrease, regional-scale contributions that may have aged for intermediate (~2 days) or long (~7  
75 days) periods prior to arrival at a receptor gain in importance. These profiles experience  
76 augmentation and depletion of chemical abundances owing to photochemical reactions among  
77 their gases and particles, as well as interactions upon mixing with other source emissions.

78 Peatland fires produce long-lasting thick smoke that leads to adverse atmospheric, climate,  
79 ecological, and health impacts. Smoke from Indonesian and Malaysian peatlands is a major  
80 concern in the countries of southeast Asia (Wiggins et al., 2018) and elsewhere; it is transported  
81 over long distances. Aged peat smoke profiles are likely to differ from fresh emissions, as well as  
82 among the different types of peat in other parts of the world.

83 Ground-based, aircraft, shipboard, and laboratory peat combustion experiments have been  
84 carried out to better represent global peat fire emissions and estimate their environmental impacts  
85 (e.g., Akagi et al., 2011; Iinuma et al., 2007; Nara et al., 2017; Stockwell et al., 2014; 2016). Most

86 peat fire studies report emission factors (EFs) for pyrogenic gases (e.g., methane, carbon  
87 monoxide, and carbon dioxide) and fine particle (PM<sub>2.5</sub>, particles with aerodynamic diameter <2.5  
88 microns) mass, with a few studies reporting EFs for organic and elemental carbon (OC and EC)  
89 (Hu et al., 2018).

90 Despite this lack of peat-specific fresh and aged source profiles, results have been  
91 published for source apportionment in Indonesia (See et al., 2007), Malaysia (Fujii et al., 2017),  
92 Singapore (Budisulistiorini et al., 2018), and Ireland (Dall'Osto et al., 2013; Kourtchev et al., 2011;  
93 Lin et al., 2019). These have involved sampling under near-source and far from-source dominated  
94 environments, such as the 2015 Indonesia burning episode to determine changes in thermally-  
95 derived carbon fractions with aging (Tham et al., 2019), and inference of aged peat-burning  
96 profiles from positive matrix factorization (PMF) application to chemically-specified ambient PM  
97 samples (Fujii et al., 2017). Budisulistiorini et al. (2018) observe that "...atmospheric processing  
98 of aerosol particles in haze from Indonesian wildfires has scarcely been investigated. This lack of  
99 study inhibits a detailed treatment of atmospheric processes in the models, including aerosol aging  
100 and secondary aerosol formation."

101 Changes in source profiles have been demonstrated in large smog chambers (Pratap et al.,  
102 2019), wherein gas/particle mixtures are illuminated with ultraviolet (UV) light for several hours  
103 and their end products are measured. Such chambers are specially constructed and limited to  
104 laboratory testing. A more recent method for simulating such aging is the oxidation flow reactor  
105 (OFR), based on the early studies of Kang et al. (2007), revised and improved by several  
106 researchers (e.g., Jimenez, 2018; Lambe et al., 2011), and commercially available from Aerodyne  
107 (2019a, b). Although the Aerodyne potential aerosol mass (PAM)-OFR has many limitations, as  
108 explained in the supplemental material (Section S.1), it is a practical method for understanding  
109 how profiles might change with different degrees of atmospheric aging. A growing users group  
110 (PAMWiki, 2019) provides increasing knowledge of its characteristics and operations.

111 Laboratory peat combustion EFs for gaseous carbon and nitrogen species corresponding  
112 with the profiles described here, as well as PM<sub>2.5</sub> mass and major chemical species (e.g., carbon  
113 and ions), are reported by Watson et al. (2019). The PM<sub>2.5</sub> speciated source profiles derive from  
114 six peat fuels collected from Odintsovo, Russia; Pskov, Siberia; Northern Alaska and Florida,  
115 U.S.A.; and Borneo, Malaysia; representing boreal, temperate, subtropical, and tropical climate  
116 regions. Comparisons between fresh (diluted and unaged) and aged (represent intermediate-aged

117 [ $\sim 2$  days] and well-aged [ $\sim 7$  days] laboratory simulated oxidation with an OFR) PM<sub>2.5</sub> speciated  
118 profiles are made to highlight chemical abundance changes with photochemical aging. The  
119 objectives of this study are to: 1) evaluate similarities and differences among the peat source  
120 profiles from four biomes; 2) examine the extent of gas-to-particle oxidation and volatilization  
121 between 2- and 7-days of simulated atmospheric aging; and 3) characterize carbon and nitrogen  
122 properties in peat combustion emissions.

## 123 **2 Experiment**

124 The supplemental material describes sampling configuration shown in Fig. S1 and OFR  
125 operation. Briefly, peat smoke generated in a laboratory combustion chamber (Tian et al., 2015)  
126 was diluted with clean air (by factors of three to five) to allow for nucleation and condensation at  
127 ambient temperatures (Watson et al., 2012). These diluted emissions were then passed through  
128 an unmodified Aerodyne PAM-OFR in the OFR185 mode without ozone (O<sub>3</sub>) injection. Hydroxyl  
129 radical (OH) production as a function of UV lamp voltage was estimated by inference from sulfur  
130 dioxide (SO<sub>2</sub>) decay using well-established rate constants. UV lamps were operated at 2 and 3.5  
131 volts with a flow rate of 10 L min<sup>-1</sup> and a plug-flow residence time of  $\sim 80$  s in the 13.3 L anodine-  
132 coated reactor, which translates to OH exposures (OH<sub>exp</sub>) of  $\sim 2.6 \times 10^{11}$  and  $\sim 8.8 \times 10^{11}$  molecules-  
133 sec cm<sup>-3</sup> at 2 volts and 3.5 volts, respectively.

134 Transport times between source and receptor of 1 to 10 days are typical of peat burning  
135 plumes, and the two OH<sub>exp</sub> estimates were selected to examine intermediate ( $\sim 2$  days) and long-  
136 term ( $\sim 7$  days) atmospheric aging. Other emissions aging experiments (e.g., Bhattarai et al., 2018)  
137 cite Mao et al. (2009) for a 24-hour average atmospheric OH concentration (OH<sub>atm</sub>) of  $1.5 \times 10^6$   
138 molecules cm<sup>-3</sup>. This number appears nowhere in the text of Mao et al. (2009), but it corresponds  
139 to the ground-level median value in Mao's Figure 8 plot of OH vs. altitude for Asian outflows over  
140 the Pacific Ocean. The individual measurements in the plot range from OH<sub>atm</sub> near-zero to  $5.3 \times 10^6$   
141 molecules cm<sup>-3</sup>. Altshuller (1989) concluded that "The literature contains reports of atmospheric  
142 OH radical concentrations measured during daylight hours ranging from  $10^5$  molecule cm<sup>-3</sup> to over  
143  $10^8$  molecule cm<sup>-3</sup>, but almost all of the values reported are below  $5 \times 10^7$  molecules cm<sup>-3</sup>." Stone  
144 et al. (2012) report atmospheric values ranging from  $1.1 \times 10^5$  molecules cm<sup>-3</sup> in polar environments  
145 to  $1.5 \times 10^7$  molecules cm<sup>-3</sup> in a vegetated forest. Uncertainties in OH<sub>exp</sub> within the OFR are,  
146 therefore, not the controlling uncertainty in estimating profile aging times. Added to this  
147 uncertainty are reactions among emission constituents that are not embodied in the OFR185 mode

148 that tend to suppress  $\text{OH}_{\text{exp}}$  with respect to that estimated by the  $\text{SO}_2$  calibration (Li et al., 2015;  
149 Peng et al., 2015; Peng et al., 2016; Peng and Jimenez, 2017; Peng et al., 2018). The “OFR  
150 Exposure Estimator” available from the PAMWiki (2019) intends to estimate this  $\text{OH}_{\text{exp}}$ , but  
151 detailed VOC from these experiments are insufficient to apply it. The nominal 2- and 7-day aging  
152 times determined by dividing  $\text{OH}_{\text{exp}}$  by Mao’s  $1.5 \times 10^6$  molecules  $\text{cm}^{-3}$  are subject to these  
153 uncertainties, which may increase or decrease the aging time estimates. However, these  
154 uncertainties, along with other uncertainties related to peat sample selection, moisture content, and  
155 laboratory burning conditions do not negate the value of the measurements reported here. There  
156 are distinct differences in the fresh, intermediate-aged, and well-aged profiles that address the  
157 concerns expressed by Budisulistiorini et al. (2018).

158 Forty smoldering-dominated peat combustion tests were conducted that included three to  
159 six tests for each type of peat fuel (Table S1). The following analysis uses time-integrated (~40–  
160 60 minutes) gaseous and  $\text{PM}_{2.5}$  filter pack samples collected upstream and downstream of the OFR,  
161 representing fresh and aged peat combustion emissions, respectively.

## 162 **2.1 $\text{PM}_{2.5}$ mass and chemical analyses**

163 Measured chemical abundances included  $\text{PM}_{2.5}$  precursor gases (i.e., nitric acid [ $\text{HNO}_3$ ]  
164 and ammonia [ $\text{NH}_3$ ]) as well as  $\text{PM}_{2.5}$  mass and major components (e.g., elements, ions, and  
165 carbon). Water-soluble organic carbon (WSOC), carbohydrates, and organic acids that are  
166 commonly used as markers in source apportionment for biomass burning were also quantified  
167 (Chow and Watson, 2013; Watson et al., 2016).

168 The filter pack sampling configurations for the four upstream and two downstream  
169 channels along with filter types and analytical instrument specifications are shown in Fig. 1.  
170 Multiple sampling channels accommodate different filter substrates that allow for comprehensive  
171 chemical speciation. Additional upstream Teflon-membrane and quartz-fiber filters were taken  
172 for more specific nitrogen and organic compound analyses that are not reported here. The limited  
173 flow through the OFR precludes additional downstream sampling.

174 Teflon-membrane filters (i.e., channels one and five in Fig. 1) were submitted for: 1)  
175 gravimetric analysis by microbalance with  $\pm 1$   $\mu\text{g}$  sensitivity before and after sampling to acquire  
176  $\text{PM}_{2.5}$  mass concentrations (Watson et al., 2017); 2) filter light reflectance and transmittance by  
177 ultraviolet/visible (UV/Vis) spectrometer (200–900 nm) equipped with an integrating sphere that  
178 measures transmitted/reflected light at 1 nm interval (Johnson, 2015); 3) 51 elements (i.e., sodium

179 [Na] to uranium [U]) by energy-dispersive x-ray fluorescence (XRF) analysis (Watson et al.,  
180 1999); and 4) organic functional groups by Fourier Transform Infrared (FTIR) spectrometry.  
181 Results from UV/Vis and FTIR spectrometry will be reported elsewhere.

182 Half of the quartz-fiber filter (i.e., channels two and six) was analyzed for: 1) four anions  
183 (i.e., chloride [Cl<sup>-</sup>], nitrite [NO<sub>2</sub><sup>-</sup>], nitrate [NO<sub>3</sub><sup>-</sup>], and sulfate [SO<sub>4</sub><sup>=</sup>]), three cations (i.e., water-  
184 soluble sodium [Na<sup>+</sup>], potassium [K<sup>+</sup>], and ammonium [NH<sub>4</sub><sup>+</sup>]), and nine organic acids (including  
185 four mono- and five di-carboxylic acids) by ion chromatography (IC) with a conductivity detector  
186 (CD) (Chow and Watson, 2017); 2) 17 carbohydrates including levoglucosan and its isomers by  
187 IC with a pulsed amperometric detector (PAD); and 3) WSOC by combustion and non-dispersive  
188 infrared (NDIR) detection. A portion (0.5 cm<sup>2</sup>) of the other half quartz-fiber filter was analyzed  
189 for OC, EC, and brown carbon (BrC) by the IMPROVE\_A multiwavelength thermal/optical  
190 reflectance/transmittance method (Chen et al., 2015; Chow et al., 2007; 2015b); the IMPROVE\_A  
191 protocol (Chow et al., 2007) reports eight operationally defined thermal fractions (i.e., OC1 to  
192 OC4 evolved at 140, 280, 480, and 580 °C in helium atmosphere; EC1 to EC3 evolved at 580,  
193 740, and 840 °C in helium/oxygen atmosphere; and pyrolyzed carbon [OP]) that further  
194 characterize carbon properties under different combustion and aging conditions. Citric acid and  
195 sodium chloride impregnated cellulose-fiber filters placed behind the Teflon-membrane and  
196 quartz-fiber filters, respectively, acquired NH<sub>3</sub> as NH<sub>4</sub><sup>+</sup> and HNO<sub>3</sub> as volatilized nitrate,  
197 respectively, with analysis by IC-CD.

198 Detailed chemical analyses along with quality assurance/quality control (QA/QC)  
199 measures are documented in Chow and Watson (2013). For each analysis, a minimum of 10 % of  
200 the samples were submitted for replicate analysis to estimate precisions. Precisions associated  
201 with each concentration were calculated based on error propagation (Bevington, 1969) of the  
202 analytical and sampling volume precisions (Watson et al., 2001).

## 203 **2.2 PM<sub>2.5</sub> source profiles**

204 Concentrations of two gases (i.e., NH<sub>3</sub> and HNO<sub>3</sub>) and 125 chemical species acquired from  
205 each sample pair (fresh vs. aged) were normalized by the PM<sub>2.5</sub> gravimetric mass to obtain source  
206 profiles with species-specific fractional abundances. The following analyses are based on the  
207 average of 24 paired profiles (shown in Table 1), grouped by upstream (fresh) and downstream  
208 (aged) samples for 2- and 7-day aging (i.e., denoted as Fresh 2 vs. Aged 2 and Fresh 7 vs. Aged 7)  
209 for each of the six peats with 25 % fuel moisture. Composite profiles are calculated based on the



210 average of individual abundances and the standard deviation of the average within each group  
211 (Chow et al., 2002). Although the standard deviation is termed the source profile abundance  
212 uncertainty, it is really an estimate of the profile variability for the same fuels and burning  
213 conditions, which exceeds the propagated measurement precision.

214 To assess changes with fuel moisture content, tests of three sets of Putnam (FL1) peats at  
215 60 % fuel moisture were conducted with resulting profiles shown in Table S2. A few samples  
216 were voided due to filter damage or sampling abnormality, which produced five unpaired (either  
217 fresh or aged) individual profiles (Table S3). These profiles are reported as they might be useful  
218 for future source apportionment studies.

### 219 2.3 Equivalence measures

220 The Student *t*-test is commonly used to estimate the statistical significance of differences  
221 between chemical abundances. Two additional measures are used to determine the similarities  
222 and differences between profiles: 1) the correlation coefficient (*r*) between the source profile  
223 abundances ( $F_{ij}$ , the fraction of species *i* in peat *j*) divided by the source profile variabilities ( $\sigma_{ij}$ )  
224 that quantifies the strength of association between profiles; and 2) the distribution of weighted  
225 differences (residual [*R*]/uncertainty [*U*] =  $[F_{i1} - F_{i2}]/[\sigma_{i1}^2 + \sigma_{i2}^2]^{0.5}$ ) for  $< 1\sigma$ ,  $1\sigma-2\sigma$ ,  $2\sigma-3\sigma$ , and  
226  $>3\sigma$ . The percent distribution of *R/U* ratios is used to understand how many of the chemical  
227 species differ by multiples of the uncertainty of the difference. These measures are also used in  
228 the effective variance-chemical mass balance (EV-CMB) receptor model solution that uses the  
229 variance ( $r^2$ ) and the *R/U* ratio to quantify agreement between measured receptor concentrations  
230 and those produced by the source profiles and source contribution estimates (Watson, 2004).

## 231 3 Results and discussion

### 232 3.1 Similarities and differences among peat profiles

233 The equivalence measures are used to provide guidance in compositing and comparing the  
234 40 sets of fresh vs. aged profiles. The first comparison is made between two Florida samples from  
235 locations separated by ~485 km (i.e., Putnam County Lakebed [FL1] and Everglades National Park  
236 [FL2]), representing different geological areas and land uses. Panel A of Table S4 shows that the  
237 two profiles yield high correlations ( $r > 0.994$ ), but are statistically different ( $P < 0.002$ ); with over  
238 93 % of the chemical abundance differences within  $\pm 3\sigma$ . However, when combining both fresh  
239 Florida profiles (i.e., all Fresh 2 vs. all Fresh 7 in Panel B), statistical differences are not found,  
240 with over 98 % of abundance differences within  $\pm 1\sigma$  and  $P > 0.5$ . Notice that statistical

241 differences are found between the two fresh Florida profiles (i.e., FL1 Fresh 2 vs. FL2 Fresh 2 and  
242 FL1 Fresh 7 vs. FL2 Fresh 7 in Panel A) with few ( $< 0.81\%$  and  $5.6\%$ ) R/U ratios exceeding  $3\sigma$ ;  
243 combining the two Florida profiles may cancel out some of the differences. However, paired  
244 comparisons of other combined profiles show statistical differences with low  $P$ -values ( $P < 0.002$ ).  
245 To further demonstrate the differences, these two Florida profiles are classified as Subtropical 1  
246 and Subtropical 2 to compare with other biomes.

247 Similarities and differences in peat profiles by biome are summarized in Table 2.  
248 Comparisons are made for: 1) paired fresh vs. aged profiles (i.e., All Fresh vs. All Aged; Fresh 2  
249 vs. Aged 2; and Fresh 7 vs. Aged 7); 2) different experimental tests (i.e., Fresh 2 vs. Fresh 7); and  
250 3) two aging times (i.e., Aged 2 vs. Aged 7). Equivalence measures show that most of these  
251 profiles are highly correlated ( $r > 0.97$ , mostly  $> 0.99$ ) but statistically different ( $P < 0.05$ ), with a  
252 few exceptions.

253 Group comparisons between fresh and aged samples (Panel A of Table 2) show statistical  
254 differences for all but Putnam (FL1) peat ( $P > 0.94$ ). This is consistent with Watson et al (2019)  
255 where atmospheric aging (7 days) reduced organic carbon EFs (i.e.,  $EF_{OC}$ ) by  $\sim 20 - 33\%$  for all  
256 but Putnam (FL1) peats ( $EF_{OC}$  remained within  $\pm 0.5\%$ ). As OC is a major component of  $PM_{2.5}$ ,  
257 no apparent changes in OC and carbon fractions abundances may dictate the lack of statistical  
258 differences between the fresh and aged profiles.

259 Paired comparisons for 2-day aging (Panel B of Table 2) show no statistical differences  
260 between the Fresh 2 vs. Aged 2 Putnam (FL1) and Malaysian profiles ( $P > 0.30$  and  $0.95$ ), which  
261 may be due to the low number of samples ( $n=2$ ) in the comparison; this results in no statistical  
262 differences for combined Putnam (FL1) and Malaysian peat comparison ( $P > 0.62$ ). Similar to the  
263 findings of combining both fresh Florida profiles (i.e., all Fresh2 vs. all Fresh 7 in Table S4), the  
264 two fresh Alaskan profiles (Fresh 2 vs. Fresh 7 in Panel D of Table 2) do not show statistical  
265 differences ( $P > 0.12$ ).

266 Compositing profiles by averaging each of the measured abundances may disguise some  
267 useful information. For receptor model source apportionment, region-specific profiles are most  
268 accurate for estimating source contributions.

269 Student  $t$ -tests for the gravimetric  $PM_{2.5}$  mass concentrations ( $\mu g\ m^{-3}$ ) measured upstream  
270 and downstream of the OFR (Table S5) show statistically significant differences ( $P < 0.05$ )

271 between fresh vs. aged PM<sub>2.5</sub> (i.e., Fresh 2 vs Aged 2 and Fresh 7 vs Aged 7). Fresh 2 and Fresh  
272 7 PM<sub>2.5</sub> mass concentrations are similar, as expected from replicate tests for the same conditions.  
273 Increases in some species abundances offset decreases on other abundances, resulting in similar  
274 PM<sub>2.5</sub> levels for “all Fresh vs. all Aged” comparison.

### 275 **3.2 Sum of species to PM<sub>2.5</sub> mass ratios**

276 The sum of the major PM chemical abundances should be less than unity since oxygen,  
277 hydrogen, and liquid water content are not measured (Chow et al., 1994; 1996). As shown in Table  
278 S6, the sums of elements, ions, and carbon explain averages of ~70–90 % of PM<sub>2.5</sub> mass for fresh  
279 profiles except for Russian peat (62–64 %). The “sum of species” decreased by an average of 6  
280 % and 11 % after 2- and 7-days, respectively. These differences are consistent with loss of semi-  
281 volatile organic compounds (SVOCs) in the low temperature carbon fractions, although they are  
282 offset by formation of oxygenated compounds during aging. This is true for all but Putnam (FL1)  
283 peat, for which the “sum of species” explains nearly the same fraction of PM<sub>2.5</sub> for the fresh and  
284 aged profiles.

### 285 **3.3 Comparison between fresh and aged profiles**

286 Fresh and aged chemical abundances are compared in Fig. 2. Species abundances vary by  
287 several orders of magnitude but exhibit two distinguishable clusters: centered around 0.1 % for  
288 reactive and secondary ionic species (e.g., NH<sub>4</sub><sup>+</sup>, NO<sub>3</sub><sup>-</sup>, and SO<sub>4</sub><sup>-</sup>) and centered around 10 % for  
289 carbon compounds (e.g., OC fractions and WSOC). While most gaseous NH<sub>3</sub>/PM<sub>2.5</sub> ratios exceed  
290 10 %, HNO<sub>3</sub>/PM<sub>2.5</sub> ratios are well below 1 %. Reactive/ionic species and carbon components are  
291 mostly above and below the 1:1 line, respectively, implying particle formation and evaporation  
292 after atmospheric aging. Large variabilities are found for individual species as noted by the  
293 standard deviations associated with each average.

294 Figure 3 shows the ratio of averages between aged and fresh profiles with increasing ratios  
295 from 2- to 7-day aging. Atmospheric aging increased oxalic acid, NO<sub>3</sub><sup>-</sup>, NH<sub>4</sub><sup>+</sup>, and SO<sub>4</sub><sup>-</sup>  
296 abundances (likely due to conversion of nitrogen and sulfur gases [e.g., NH<sub>3</sub>, NO, NO<sub>2</sub>, and SO<sub>2</sub>]  
297 to particles), but decreased NH<sub>3</sub>, levoglucosan, and low temperature OC1 and OC2 abundances in  
298 most cases. Large variations are found among measured species (left panels in Fig. 3) as ratios  
299 range several orders of magnitude for mineral and ionic species. Consistent with Fig. 2 where  
300 most carbon compounds are close to but below the 1:1 line, the right panels in Fig. 3 show the  
301 reduction of carbonaceous abundances with aged/fresh ratios between 0.1 and 1. Higher aged/fresh

302 ratios in low temperature OC1 and OC2 after 7-day aging are consistent with additional  
303 volatilization with longer aging time.

304 Atmospheric aging should not change the abundances of mineral species (e.g., Al, Si, Ca,  
305 Ti, and Fe), except to the extent that the PM<sub>2.5</sub> mass (to which all species are normalized) increases  
306 or decreases with aging. Large standard deviations associated with the ratio of averages for  
307 mineral species in the left panels of Fig. 3 illustrate variabilities among different combustion tests  
308 for the less abundant species.

### 309 **3.4 Carbon abundances**

#### 310 **3.4.1 Organic carbon and thermally-evolved carbon fractions**

311 Total carbon (TC, sum of OC and EC) constitutes the largest fraction of PM<sub>2.5</sub> (Table 1),  
312 accounting for 59–87 % and 43–77 % of the PM<sub>2.5</sub> mass for the fresh and aged profiles,  
313 respectively. OC dominates TC with low EC abundances (0.67–4.4 %), as commonly found in  
314 smoldering-dominated biomass combustion (Chakrabarty et al., 2006; Chen et al., 2007). The  
315 largest OC fractions are high temperature OC3 (15–30 % of PM<sub>2.5</sub>), consistent with past studies  
316 for biomass burning emissions (Chen et al., 2007; Chow et al., 2004).

317 OC abundances decreased with aging time. As shown in Fig. S2, upstream (Fresh 2 and  
318 Fresh 7) OC abundances ranged from 58–85 % and decreased by 4–12 % and 20–33 % after 2-  
319 and 7-day aging, respectively. The exception is for Putnam (FL1) peat, where the OC  
320 abundances were similar (changed by ~0.5 to 1.5%) between fresh and aged profiles. Part, but  
321 not all of this reduction is due to increasing abundances of non-carbon components, particularly  
322 nitrogen-containing species that add to PM<sub>2.5</sub> mass. OC abundance decreases after aging for  
323 other profiles may have contributed to the statistical differences found between fresh and aged  
324 PM<sub>2.5</sub> mass (Table S5). With the exception of Putnam (FL1) peat, the additional 7–22% OC  
325 degradation from 2- to 7-day aging implies that much of the OC changes require about a week of  
326 aging time.

327 The Student *t*-test for fresh and aged profiles shows statistical differences ( $P < 0.05$ ) for  
328 TC, OC, and low temperature OC1 and OC2, but similarities for OC3 and OC4. High  
329 temperature OC3 and OC4 contain more polar and/or high molecular-weight organic  
330 components (Chen et al., 2007) that are less likely to photochemically degrade. Large fractions  
331 of pyrolyzed carbon (OP of 7–13 %) are also found, indicative of higher molecular-weight  
332 compounds that are likely to char (Chow et al., 2001; Chow et al., 2004; Chow et al., 2018).

333 Reduction in OC abundances after atmospheric aging is attributed mostly to decreases in  
334 low temperature OC1 and OC2 abundances in the OFR as shown in the fresh vs. aged ratios of  
335 average abundances (Fig. 3). Figure S3a shows reductions in OC1 abundances after 2- and 7-  
336 days of atmospheric aging is apparent but at a similar level: ranging from 2–10 % and 3–14 %,  
337 respectively. Additional OC1 reductions from 2- to 7-days are most apparent for Russia and  
338 Everglades (FL2) peats at the 6–10 % level. Similar reductions are found for OC2 (Fig. S3b):  
339 ranging from 3–11 % and 3–12 % after the 2- and 7-days of aging, respectively. Prolonged aging  
340 times resulted in additional 4–8 % OC2 reduction for all but Russian and Putnam (FL1) peats. As  
341 oxidation of organic compounds with OH radicals is an efficient chemical aging process (Chim  
342 et al., 2018), some of the VOCs and SVOCs may have been liberated (Smith et al., 2009).

### 343 **3.4.2 Organic mass (OM) and OM/OC ratios**

344 Reduction of the “sum of species” and OC abundances from fresh to aged profiles can be  
345 offset by the formation of oxygenated organic compounds as the profiles age. Different  
346 assumptions have been used to transform OC to organic mass (OM) to account for unmeasured H,  
347 O, N, and S in organic compounds (Cao, 2018; Chow et al., 2015a; Riggio et al., 2018). As single  
348 multipliers for OC cannot capture changes by oxidation in the OFR, OM is calculated by  
349 subtracting mineral components (using the IMPROVE soil formula by Malm et al. (1994)), major  
350 ions (i.e.,  $\text{NH}_4^+$ ,  $\text{NO}_3^-$ , and  $\text{SO}_4^{2-}$ ), and EC from  $\text{PM}_{2.5}$  mass to account for unmeasured mass in  
351 organic compounds (Chow et al., 2015a; Frank, 2006). This approach assumes that no major  
352 chemical species are unmeasured and that the remaining mass consists of H, O, N, and S associated  
353 with OC in forming OM.

354 Table 3 shows that OM/OC ratios ranged from 1.1–1.7 and 1.3–2.2 for fresh and aged  
355 profiles, respectively. The lower OM/OC ratios in fresh emissions are consistent with those  
356 reported for other types of biomass burning (Chen et al., 2007; Reid et al., 2005). Figure S4 shows  
357 a general upward trend in OM/OC ratios after atmospheric aging with additional 14–21 %  
358 increases from 2- to 7-days for all but Putnam (FL1) peat. The increase in OM/OC ratios with  
359 aging are likely due to an increase in oxygenated organics. The OM/OC ratio of  $1.20 \pm 0.05$  for  
360 fresh Borneo, Malaysian peat is consistent with the  $1.26 \pm 0.04$  ratio for fresh peat burning  
361 emissions in Central Kalimantan, Indonesia (Jayarathne et al., 2018), both located on the Island of  
362 Borneo.

363 The highest OM/OC ratios are found for Russian peat, ranging 1.6–1.7 for fresh profiles  
364 and increasing to 2.1–2.2 for aged profiles, consistent with formation of low vapor pressure  
365 oxygenated compounds in the OFR. Watson et al. (2019) report that the Russian peat fuel contains  
366 the lowest carbon ( $44.20 \pm 1.01$  %) and highest oxygen ( $38.64 \pm 0.78$  %) contents among the six  
367 peats. The low carbon contents in peat fuel and source profiles are consistent with the lowest “sum  
368 of species” found in Russian peat, with 62–64 % and 50–52 % of PM<sub>2.5</sub> mass for the fresh and  
369 aged profiles, respectively. After 7-day aging for Siberian peat, the increasing OM/OC ratios from  
370  $1.2 \pm 0.14$  to  $1.5 \pm 0.18$  are similar to the increase from 1.22 to 1.42 reported by Bhattarai et al.  
371 (2018).

### 372 **3.4.3 Water-soluble organic carbon (WSOC)**

373 WSOC abundances in PM<sub>2.5</sub> were over two-fold higher in fresh Russian (36–37 %) than  
374 Malaysian (15–17 %) peat. The 15–17 % WSOC in PM<sub>2.5</sub> for fresh Borneo, Malaysian peat  
375 (Table 1) is consistent with the  $16 \pm 11$  % from Central Kalimantan, Indonesia peat (Jayarathne  
376 et al., 2018). However, the WSOC/PM<sub>2.5</sub> ratio is not a good indicator of changes in WSOC  
377 abundances during atmospheric aging as PM<sub>2.5</sub> also contains non-water-soluble and non-  
378 carbonaceous aerosol. Table S7 shows large variabilities associated with the differences (i.e.,  
379 aged minus fresh), suggesting that no differences exist within  $\pm 3$  standard deviations. The only  
380 exceptions are for the 7-day Putnam (FL1) peat and 2-day Malaysian peat, where aging resulted  
381 in 7–8 % increases of WSOC abundances in PM<sub>2.5</sub>.

382 As WSOC is part of the OC, the WSOC/OC ratio is a better indicator of atmospheric  
383 aging. WSOC/OC ratios (Table 3) vary between fresh (0.18–0.64) and aged (0.31–0.71) profiles.  
384 Figure S5 shows a general increase of WSOC/OC ratios from fresh to aged profiles. Longer  
385 aging time from 2- to 7-days results in 5–10 % higher WSOC/OC ratios for all but the two  
386 Florida peats. OC water-solubility also varies by peat type. Russian peat OC emissions are  
387 largely water-soluble, whereas Malaysian peat emissions are mostly water-insoluble, with  
388 WSOC/OC ratios of 0.59–0.71 and 0.18–0.40, respectively.

### 389 **3.4.4 Carbohydrates**

390 Bates et al. (1991) found that peat from Sumatra, Indonesia consisted of 18–46 %  
391 carbohydrate (mainly levoglucosan) relative to total carbon based on nuclear magnetic resonance  
392 spectroscopy. Levoglucosan and its isomers (mannosan and galactosan) are saccharide derivatives  
393 formed from incomplete combustion of cellulose and hemi-cellulose (Kuo et al., 2008;

394 Louchouart et al., 2009) and have been used as markers for biomass burning in receptor model  
395 source apportionment (Bates et al., 1991; Watson et al., 2016). These carbohydrate-derived  
396 pyrolysis products undergo heterogeneous oxidation when exposed to OH radicals in the OFR  
397 (Hennigan et al., 2010; Kessler et al., 2010).

398 Only five of the 17 carbohydrates (Table 1) were detected, with noticeable variations (e.g.,  
399 >2 orders of magnitude) in levoglucosan for boreal and temperate peats. Levoglucosan abundances  
400 account for 35–39 % and 20–25 % of PM<sub>2.5</sub> mass for fresh and aged Russian profiles, respectively.  
401 On a carbon basis, Table 3 shows that levoglucosan-carbon (with an OM/OC ratio of 2.25)  
402 accounts for 42–48 % and 30–35 % of WSOC and 27–28 % and 21–24 % of OC for fresh and  
403 aged Russian profiles, respectively. These levels are less than the  $96 \pm 3.8$  % levoglucosan or  
404  $\sim 42.7$  % of levoglucosan-carbon in OC reported for German and Indonesian peats (Iinuma et al.,  
405 2007). Elevated levoglucosan is also found for Siberian and Alaskan peats, ranging from 4–18 %  
406 in PM<sub>2.5</sub>. However, the levoglucosan abundances are low (1–4 %) for the subtropical and tropical  
407 peats. Aging time of 7 days resulted in an additional 1–4 % levoglucosan degradation relative to  
408 2 days with the exception of an additional 9 % reduction for Russian peat.

409 The extent of levoglucosan degradation depends on organic aerosol composition, OH  
410 exposure in the OFR, and vapor-wall losses (Bertrand et al., 2018a; 2018b; Pratap et al., 2019).  
411 Figure 4 shows the presence of levoglucosan-carbon for the Russian and Alaskan peats after 2-  
412 and 7-day aging, at the levels of 8–11 % and 2–9 %, respectively, in line with a chemical lifetime  
413 longer than 2 days. This is consistent with the estimated 1.2–3.9 days of levoglucosan lifetimes  
414 under different environments reported by Lai et al. (2014). However, other studies (Hennigan et  
415 al., 2010; May et al., 2012; Pratap et al., 2019) found that levoglucosan experiences rapid gas-  
416 phase oxidation, resulting in  $\sim 1$ –2 day lifetimes at ambient temperatures.

417 Among the carbohydrates, Jayarathne et al. (2018) reported  $4.6 \pm 4.0$  % of levoglucosan in  
418 OC for fresh Indonesia peat. Converting to levoglucosan-carbon in Jayarathne et al. (2018) yields  
419 a fraction of 2 %, consistent with findings for Malaysian peat (1.4–2.4 %) in this study.

420 While the presence of levoglucosan in peat smoke is apparent, its isomer, galactosan was  
421 not detectable. Mannosan is detectable in cold climate peats with 1–5 % of PM<sub>2.5</sub> for the Russian  
422 and Alaskan peats and up to 1.3 % for Siberian peat. Apparent degradations from 3.9 to 2.5 % and  
423 from 5.0 to 2.1 % in mannosan abundances are found for Russian peat (Table 1) after 2- and 7-  
424 days, respectively. A 2- to 3-fold reduction in mannosan is also shown after 7 days aging for the

425 Siberian and Alaskan peats. Similar observations apply to glycerol in Russian peat, ranging 1.9–  
426 3.5 % and 1.3–1.7 % of PM<sub>2.5</sub> for fresh and aged profiles, respectively. Other detectable  
427 carbohydrates are galactose and mannitol, typically present at one hundredth of one percent of the  
428 levoglucosan abundance.

### 429 **3.4.5 Organic acids**

430 Organic acids have been associated with many anthropogenic sources, including engine  
431 exhaust, biomass burning, meat cooking, bioaerosol, and biogenic emissions. Past studies show  
432 the presence of low molecular-weight dicarboxylic acids in biomass burning emissions (e.g.,  
433 Falkovich et al., 2005; Veres et al., 2010).

434 Only four of the ten measured organic acids (Table 1) (i.e., formic acid, acetic acid, oxalic  
435 acid, and propionic acid) were detectable with variable abundances (<0.02–3.9 %). The largest  
436 changes between fresh and aged profiles are found for oxalic acid, ranging from <0.02–0.43 % of  
437 PM<sub>2.5</sub> for fresh profiles, with ~10- to 20-fold increase after 2 days (0.6–1.3 %), and with one to  
438 two orders of magnitude increases after 7 days (1.1–3.9 %). With the exception of Putnam (FL1)  
439 peat ( $1.1 \pm 0.19$  %), oxalic acid accounts for >2.9 % of PM<sub>2.5</sub> mass after 7 days.

440 Acetic acid abundances are stable between fresh and aged profiles, mostly in the range of  
441 0.2–0.5 % except for a 6-fold increase from  $0.23 \pm 0.15$  % (Fresh 7) to  $1.5 \pm 2.0$  % (Aged 7) for  
442 Siberian peat with large variability among the tests. Formic acid and propionic acid abundances  
443 are low (<0.5 and <0.02 %, respectively), but increase with aging. Extending the aging time from  
444 2- to 7-days resulted in a notable increase in organic acid abundances, consistent with the increases  
445 in WSOC/OC ratios (Table 3). By biome, the highest abundances for organic acids in PM<sub>2.5</sub> are  
446 found for aged (Aged 7) Siberian peat, with  $3.9 \pm 1.4$  % oxalic acid,  $1.5 \pm 2.0$  % acetic acid, and  
447  $0.44 \pm 0.28$  % formic acid (Table 1).

### 448 **3.5 Nitrogen species, sulfate, and chloride abundances**

449 Ammonia normalized to PM<sub>2.5</sub> mass is high for fresh profiles, ranging 17–64 %, except for  
450 the low NH<sub>3</sub> content in Russian peat (6–8 %). These abundances are reduced to 3–14 % and 1–7  
451 % after 2- and 7-day aging, respectively. As shown in Fig. 5, most of the NH<sub>3</sub> rapidly diminished  
452 after 2 days, with increasing particle-phase NH<sub>4</sub><sup>+</sup> and NO<sub>3</sub><sup>-</sup> after 7 days. The highest NH<sub>3</sub> to PM<sub>2.5</sub>  
453 ratios are found for fresh Everglades (FL2) peat profiles (51–64 %), ~2–8 fold higher than other  
454 peats. These high and low NH<sub>3</sub>/PM<sub>2.5</sub> ratios are consistent with the nitrogen contents in peat fuel:  
455  $3.93 \pm 0.08$  % for Everglades and  $1.50 \pm 0.52$  % for Russian peats (Watson et al., 2019).



456 Ionic abundances are typically <0.5 %, especially in fresh profiles. Abundances of  $\text{NH}_4^+$   
457 in  $\text{PM}_{2.5}$  are low (0.0005–0.13 %) for fresh emissions, but increase to 0.05–1.0 % after 2 days and  
458 3.4–6.7 % after 7 days, with the exception of Putnam (FL1) peat ( $1.01 \pm 0.05$  %  $\text{NH}_4^+$ ). Extending  
459 the aging time from 2- to 7-days results in an additional increase of ~1–7 %  $\text{NH}_4^+$  abundances, in  
460 contrast to  $\text{NH}_3$  that is largely depleted after 2 days.

461 Figure 5b shows increasing in  $\text{NO}_3^-$  abundances with aging, 0.04–0.23 % for fresh profiles,  
462 increasing to 0.74–2.64 % after 2 days, and to 2.0–8.2 % after 7 days with the exception of Putnam  
463 (FL1) peat ( $1.10 \pm 0.18$  %  $\text{NO}_3^-$ ). After 7 days,  $\text{NH}_4^+$  and  $\text{NO}_3^-$  account for ~4–7 % and ~8 % of  
464  $\text{PM}_{2.5}$  mass, respectively, for Siberian, Alaskan, and Everglades (FL2) peats. No specific trend is  
465 evident for  $\text{NO}_2^-$ , mostly <0.002 %, with ~0.2 % for some fresh Siberian and Alaskan peats. The  
466 ratio of gaseous  $\text{HNO}_3$  to  $\text{PM}_{2.5}$  is low, in the range of 0.2–0.5 % without much changes between  
467 fresh and aged profiles.  $\text{HNO}_3$  created through photochemistry is largely neutralized by the  
468 abundant  $\text{NH}_3$  in the emissions, resulting in the increasing  $\text{NH}_4^+$  and  $\text{NO}_3^-$  to  $\text{PM}_{2.5}$  in aged profiles.

469 The reaction of  $\text{NH}_3$  with  $\text{HNO}_3$  to form ammonium nitrate ( $\text{NH}_4\text{NO}_3$ ) is the main pathway  
470 for inorganic aerosol formation, owing to low sulfur content in the peat fuels (Watson et al., 2019).  
471  $\text{SO}_4^-$  abundances are low in fresh profiles (0.13–1.4 %), but they increase 2–3 fold after 2 days  
472 aging except for the Alaskan (0.35–0.46 %) and Everglades (FL2) (1.3–1.4 %) profiles. More  
473 apparent changes are found for 7 days with the largest increase in  $\text{SO}_4^-$  from 0.13 to 1.96 % for  
474 the Malaysian peats –indicating formation of ammonium sulfate ( $[\text{NH}_4]_2\text{SO}_4$ ). The ion balance  
475 shows more  $\text{NH}_4^+$  than needed to completely neutralize  $\text{NO}_3^-$  and  $\text{SO}_4^-$  (Chow et al., 1994). Some  
476  $\text{NH}_4^+$  may be present as ammonium chloride ( $\text{NH}_4\text{Cl}$ ), however, the abundance of chloride ( $\text{Cl}^-$ ) is  
477 low (<0.3 %). The large increase in  $\text{NO}_3^-$  and  $\text{SO}_4^-$  after 7 days implies that a 2-day aging time is  
478 not sufficient to allow the full formation of secondary  $\text{NH}_4\text{NO}_3$  and  $(\text{NH}_4)_2\text{SO}_4$ .

### 479 **3.6 Mass reconstruction**

480 Mass reconstruction is applied to understand the changes in major chemical composition  
481 between the fresh and aged profiles. As shown in Fig. 6, the largest component of  $\text{PM}_{2.5}$  is OM,  
482 accounting for 94–99 % and 80–95 % of  $\text{PM}_{2.5}$  mass for fresh and aged profiles, respectively.  
483 Although the 7-day aging time increased the OM/OC ratios (by 12–19 %), the abundances of  
484 OM in  $\text{PM}_{2.5}$  are reduced (3–18 %). This can be attributed to the combined effects of increased  
485 oxygenated organics; SVOC volatilization (Smith et al., 2009); and an increase in ionic species  
486 as shown in the average aged/fresh ratios in Fig. 3. Figure 6 shows increases in ionic species

487 (i.e., sum of  $\text{NH}_4^+$ ,  $\text{NO}_3^-$ , and  $\text{SO}_4^{2-}$ ), with low abundances (0.3–1.7 %) in fresh profiles, and  
488 increasing 3–16 % after aging. The sum of ionic species accounts for 11–16 % of  $\text{PM}_{2.5}$  mass for  
489 the Siberian, Alaskan, Everglades (FL2), and Malaysian peats after 7 days, mainly due to the  
490 increase in  $\text{NH}_4^+$  and  $\text{NO}_3^-$  as shown in Fig. 5.

491 Elemental abundances are low ( $<0.0001$  %), mostly below the lower quantifiable limits.  
492 Table 1 only lists 34 of the 51 elements (Na to U) detected by XRF. Using the IMPROVE soil  
493 formula (assuming metal oxides of major mineral species (Malm et al., 1994) yielded 0.07–2.9 %  
494 of mineral components. The IMPROVE soil formula has been applied in many other studies (e.g.,  
495 Chan et al., 1997; Pant et al., 2015; Rogula-Kozłowska et al., 2012) which provides an adequate  
496 estimate of geological mineral in reconstructed mass. Since geological minerals are not a major  
497 component of  $\text{PM}_{2.5}$ , variations in the assumption regarding metal oxides or multipliers do not  
498 contribute to large variations in reconstructed mass (Chow et al., 2015a).

499 This study indicates that an aging time of  $\sim 2$  days represents the intermediate-aged source  
500 profile, whereas 7 days represents the profile with adequate residence time to complete the  
501 atmospheric process.

### 502 **3.7 Changes in source profiles by fuel moisture content**

503 The effect of fuel moisture content on source profiles is mostly unknown. The 25 % fuel  
504 moisture content selected for this study intends to better simulate the conditions of moderate to  
505 severe droughts where most peat fires occur. Increasing fuel moisture content from  $\sim 25$  to 60 %  
506 for the three Putnam (FL1) peat fuels yielded 12 % higher EFs for  $\text{CO}_2$  ( $\text{EF}_{\text{CO}_2}$ ), but 12–20 %  
507 lower EFs for CO, NO,  $\text{NO}_2$ , and  $\text{PM}_{2.5}$  mass (Watson et al., 2019). Tests of fuel-moisture content  
508 on profile changes are available for only 2-day aging. Equivalence measures (Table S8) show  
509 statistical differences ( $P < 0.001$ ) between 25 % and 60 % moisture profiles for either fresh or aged  
510 profiles with high correlations ( $r > 0.997$ ) and over 93 % of species abundance fall within  $\pm 3\sigma$ .  
511 While OC abundances in  $\text{PM}_{2.5}$  are comparable for the fresh and aged profiles (70–72 %) for 25  
512 % fuel moisture, a reduction of 18 % OC in  $\text{PM}_{2.5}$  is found for 60 % fuel moisture (from 82 to 64  
513 %) after aging (Table S2). The higher fuel moisture content also reduced WSOC by 6 % and  
514 levoglucosan by 1.3 % with  $<1$  % increases for  $\text{NH}_4^+$  and organic acids. After aging, the  $\text{NH}_3$  to  
515  $\text{PM}_{2.5}$  ratios decreased from 28 % to 5 % and from 20 % to 8 % for the 25 % and 60 % fuel  
516 moisture, respectively. These results are not conclusive as most measurements are associated with  
517 high variabilities.

#### 518 **4 Summary and conclusion**

519 Fresh and aged peat fire emission profiles from laboratory combustion chamber and  
520 potential aerosol mass-oxidation flow reactor (PAM-OFR) for six types of peats representing  
521 boreal (Odintsovo, Russia and Pskov, Siberia), temperate (Northern Alaska, USA), subtropical  
522 (Putnam County Lakebed and Everglades National Park, Florida, USA), and tropical (Borneo,  
523 Malaysia) biomes are compared. Analyses are focused on the average of 24 paired profiles  
524 grouped by six peats and by fresh vs. aged profiles for 2- and 7-days of simulated atmospheric  
525 aging that represent intermediate-aged and well-aged source profiles, respectively.

526 Equivalence measures show that these profiles are highly correlated ( $r > 0.97$ , mostly  
527  $> 0.99$ ) but statistically different ( $P < 0.05$ ) between different biomes, suggesting that these profiles  
528 should be used independently for receptor model source apportionment studies in different climate  
529 regions.

530 The sum of chemical species (i.e., elements, ions, and carbon) explains an average of ~70–  
531 90 % of PM<sub>2.5</sub> mass for fresh profiles except for Russian peat (62–64 %), confirming that major  
532 PM<sub>2.5</sub> chemical species are measured. Aging times of 2- and 7-days resulted in an average mass  
533 depletion of 6 % and 11 %, respectively. These differences are caused by: 1) loss of SVOCs with  
534 aging, as indicated by lower abundances of OC1 and OC2 (evolved at 140 and 280 °C) in the aged  
535 profiles; and 2) replacement of the lost OC mass with unmeasured oxygen associated with  
536 secondary organic aerosol formation in the OFR.

537 Species abundances in PM<sub>2.5</sub> between aged and fresh profiles varied by several orders of  
538 magnitude but exhibited two distinguishable clusters, with reactive/ionic species (e.g., NH<sub>4</sub><sup>+</sup>, SO<sub>4</sub><sup>2-</sup>,  
539 oxalic acid, and HNO<sub>3</sub>) constituting 0.1–1 % and carbon compounds (e.g., OC, organic carbon  
540 fractions [OC1–OC4], and WSOC) constituting >1 % (mostly >10 %) of PM<sub>2.5</sub> mass. Most  
541 NH<sub>3</sub>/PM<sub>2.5</sub> ratios are >10 % whereas HNO<sub>3</sub>/PM<sub>2.5</sub> ratios are <1 %.

542 Total carbon (TC, sum of OC and EC) is the largest component, accounting for 59–87 %  
543 and 43–77 % of the PM<sub>2.5</sub> mass for the fresh and aged profiles, respectively. With predominant  
544 smoldering combustion, the majority of the TC is OC, with low EC abundances (0.67–4.4 %).  
545 Further degradation in OC abundances (7–22 %) from 2- to 7-day aging implies an incomplete  
546 transformation with short aging time. Different thermal carbon fractions are used to characterize  
547 combustion and aging conditions. While most of the OC thermally evolved at high temperatures  
548 (OC3 at 480 °C), losses of low temperature OC1 and OC2 are found, indicating a shift of gas-

549 particle partitioning of SVOC to gas-phase, where particle volatilization outweighed gas-to-  
550 particle conversion.

551 Formation of oxygenated compounds is pronounced after aging, with organic mass (OM)  
552 to OC ratios increasing by 14–21 % from 2- to 7-day aging. The WSOC abundance in PM<sub>2.5</sub> varies  
553 from 15–17 % and 37–37 % for fresh Malaysian and Russian peats, respectively. While  
554 levoglucosan accounts for ~1–4 % of PM<sub>2.5</sub> mass for fresh subtropical and tropical peats, elevated  
555 levels (6–39 %) are found for boreal and temperate peats. Increasing the atmospheric aging time  
556 from 2- to 7-days results in additional formation of organic acid and ionic species (e.g., oxalic  
557 acid, NO<sub>3</sub><sup>-</sup>, NH<sub>4</sub><sup>+</sup>, and SO<sub>4</sub><sup>=</sup>), but enhanced losses of NH<sub>3</sub>, levoglucosan, and low temperature OC1  
558 and OC2.

559 Among the four climate regions, Russian peat with the lowest carbon (44 %) and highest  
560 oxygen (39 %) content, resulted in ~59–71 % of WSOC in OC along with the highest levoglucosan  
561 (20–39 % of PM<sub>2.5</sub>) and lowest NH<sub>3</sub>/PM<sub>2.5</sub> ratios (3–8 %). It also yielded the highest oxygenated  
562 compounds after aging with OM/OC ratios of 2.1–2.2. This contrasts with Malaysian peats that  
563 are mostly water-insoluble (WSOC/OC of 0.18–0.40) with low oxygenated compounds after aging  
564 (OM/OC ratios of 1.2–1.5). Large increases are found for oxalic acid abundances from fresh  
565 (<0.02–0.43 %) to 7-day aging (1–4%).

566 With the exception of Russian peats, fresh profiles contain high NH<sub>3</sub>/PM<sub>2.5</sub> ratios (17–64  
567 %) with low abundances after aging (3–14 % for 2 days and 1–7 % for 7 days). Extending the  
568 aging time from 2- to 7-days results in an increase to ~7–8 % NH<sub>4</sub><sup>+</sup> and NO<sub>3</sub><sup>-</sup> abundances.  
569 Although the week-long aging time increased the OM/OC ratios, abundances of OM in PM<sub>2.5</sub> were  
570 reduced by 3–18 %.

571 Source profiles can change with aging during transport from source to receptor. This study  
572 shows significant differences between fresh and aged peat combustion profiles among the four  
573 biomes that can be used to establish speciated emission inventories for air quality modeling. A  
574 sufficient aging time (~one week) is needed to allow gas-to-particle partitioning of semi-  
575 volatilized species, gas-phase oxidation, and volatilization to achieve representative source  
576 profiles for receptor-oriented source apportionment.

577 **5 Author contribution**

578 JCC, JGW, JC, L-WAC, and XW jointly designed the study, performed the data analyses,  
579 and prepared the manuscript. ACW collected the peat fuels and provided technical advice. QW,  
580 JT, and SSHH carried out the peat combustion experiments. TBC and SDK assembled the  
581 database and performed the similarity and difference tests between the fresh and aged profiles.

582 **6 Competing interests**

583 The authors declare that there are no conflicts of interest.

584 **7 Acknowledgements**

585 This research was primarily supported by the National Science Foundation (NSF,  
586 AGS1464501) as well as internal funding from both the Desert Research Institute, Reno, NV, USA,  
587 and Institute of Earth Environment, Chinese Academy of Sciences, Xian, China.  
588

## 589 8 References

- 590 Aerodyne: PAM users manual, Aerodyne Research Inc., Billerica, MA, 2019a. <https://pamusersmanual.jimdo.com/>
- 591 Aerodyne: Potential Aerosol Mass (PAM) oxidation flow reactor, Aerodyne Research Inc., Billerica, MA, 2019b.
- 592 <http://www.aerodyne.com/sites/default/files/u17/PAM%20Potential%20Aerosol%20Mass%20Reactor.pdf>
- 593 Akagi, S. K., Yokelson, R. J., Wiedinmyer, C., Alvarado, M. J., Reid, J. S., Karl, T., Crouse, J. D., and Wennberg,
- 594 P. O.: Emission factors for open and domestic biomass burning for use in atmospheric models, *Atmos. Chem. Phys.*,
- 595 11, 4039-4072, 2011.
- 596 Altshuller, A. P.: Ambient air hydroxyl radical concentrations: Measurements and model predictions, *J. Air Pollut.*
- 597 *Control Assoc.*, 39, 704-708, 1989.
- 598 Bates, A. L., Hatcher, P. G., Lerch, H. E., Cecil, C. B., Neuzil, S. G., and Supardi: Studies of a petified angiosperm
- 599 log cross-section from Indonesia by nuclear-magnetic resonance spectroscopy and analytical pyrolysis, *Organic*
- 600 *Geochemistry*, 17, 37-45, 1991.
- 601 Bertrand, A., Stefenelli, G., Jen, C. N., Pieber, S. M., Bruns, E. A., Ni, H. Y., Temime-Roussel, B., Slowik, J. G.,
- 602 Goldstein, A. H., El Haddad, I., Baltensperger, U., Prevot, A. S. H., Wortham, H., and Marchand, N.: Evolution of
- 603 the chemical fingerprint of biomass burning organic aerosol during aging, *Atmos. Chem. Phys.*, 18, 7607-7624,
- 604 2018a.
- 605 Bertrand, A., Stefenelli, G., Pieber, S. M., Bruns, E. A., Temime-Roussel, B., Slowik, J. G., Wortham, H., Prevot, A.
- 606 S. H., El Haddad, I., and Marchand, N.: Influence of the vapor wall loss on the degradation rate constants in
- 607 chamber experiments of levoglucosan and other biomass burning markers, *Atmos. Chem. Phys.*, 18, 10915-10930,
- 608 2018b.
- 609 Bevington, P. R.: *Data Reduction and Error Analysis for the Physical Sciences*, McGraw Hill, New York, NY, 1969.
- 610 Bhattarai, C., Samburova, V., Sengupta, D., Iaukea-Lum, M., Watts, A. C., Moosmüller, H., and Khlystov, A. Y.:  
611 Physical and chemical characterization of aerosol in fresh and aged emissions from open combustion of biomass  
612 fuels, *Aerosol Sci. Technol.*, 52, 1266-1282, 2018.
- 613 Budisulistiorini, S. H., Riva, M., Williams, M., Miyakawa, T., Chen, J., Itoh, M., Surratt, J. D., and Kuwata, M.:  
614 Dominant contribution of oxygenated organic aerosol to haze particles from real-time observation in Singapore  
615 during an Indonesian wildfire event in 2015, *Atmos. Chem. Phys.*, 18, 16481-16498, 2018.
- 616 Cao, J. J.: A brief introduction and progress summary of the PM<sub>2.5</sub> source profile compilation project in China,  
617 *Aerosol Science and Engineering*, 2, 43-50, 2018.
- 618 CARB: Speciation profiles used in ARB modeling, California Air Resources Board, Sacramento, CA, 2019.
- 619 <http://arb.ca.gov/ci/speciate/speciate.htm>
- 620 Chakrabarty, R. K., Moosmüller, H., Garro, M. A., Arnott, W. P., Walker, J., Susott, R. A., Babbitt, R. E., Wold, C.
- 621 E., Lincoln, E. N., and Hao, W. M.: Emissions from the laboratory combustion of wildland fuels: Particle  
622 morphology and size, *J. Geophys. Res. Atmos.*, 111, D07204, 2006.
- 623 Chan, Y. C., Simpson, R. W., McTainsh, G. H., Vowles, P. D., Cohen, D. D., and Bailey, G. M.: Characterisation of  
624 chemical species in PM<sub>2.5</sub> PM<sub>10</sub> aerosols in Brisbane, Australia, *Atmos. Environ.*, 31, 3773-3785, 1997.
- 625 Chen, L.-W. A., Chow, J. C., Wang, X. L., Robles, J. A., Sumlin, B. J., Lowenthal, D. H., Zimmermann, R., and  
626 Watson, J. G.: Multi-wavelength optical measurement to enhance thermal/optical analysis for carbonaceous aerosol,  
627 *Atmos. Meas. Tech.*, 8, 451-461, 2015.
- 628 Chen, L.-W. A., Moosmüller, H., Arnott, W. P., Chow, J. C., Watson, J. G., Susott, R. A., Babbitt, R. E., Wold, C.
- 629 E., Lincoln, E. N., and Hao, W. M.: Emissions from laboratory combustion of wildland fuels: Emission factors and  
630 source profiles, *Environ. Sci. Technol.*, 41, 4317-4325, 2007.
- 631 Chim, M. M., Lim, C. Y., Kroll, J. H., and Chan, M. N.: Evolution in the reactivity of citric acid toward  
632 heterogeneous oxidation by gas-phase OH radicals, *ACS Earth and Space Chemistry*, 2, 1323-1329, 2018.
- 633 Chow, J. C., Engelbrecht, J. P., Watson, J. G., Wilson, W. E., Frank, N. H., and Zhu, T.: Designing monitoring  
634 networks to represent outdoor human exposure, *Chemosphere*, 49, 961-978, 2002.
- 635 Chow, J. C., Fujita, E. M., Watson, J. G., Lu, Z., Lawson, D. R., and Ashbaugh, L. L.: Evaluation of filter-based  
636 aerosol measurements during the 1987 Southern California Air Quality Study, *Environ. Mon. Assess*, 30, 49-80,  
637 1994.
- 638 Chow, J. C., Lowenthal, D. H., Chen, L.-W. A., Wang, X. L., and Watson, J. G.: Mass reconstruction methods for  
639 PM<sub>2.5</sub>: A review, *Air Qual. Atmos. Health*, 8, 243-263, 2015a.
- 640 Chow, J. C., Riggio, G. M., Wang, X. L., Chen, L.-W. A., and Watson, J. G.: Measuring the organic carbon to  
641 organic matter multiplier with thermal/optical carbon mass spectrometer analyses, *Aerosol Science and Engineering*,
- 642 2, 165-172, 2018.

643 Chow, J. C., Wang, X. L., Sumlin, B. J., Gronstal, S. B., Chen, L.-W. A., Trimble, D. L., Kohl, S. D., Mayorga, S.  
644 R., Riggio, G. M., Hurbain, P. R., Johnson, M., Zimmermann, R., and Watson, J. G.: Optical calibration and  
645 equivalence of a multiwavelength thermal/optical carbon analyzer, *Aerosol Air Qual. Res.*, 15, 1145-1159, 2015b.  
646 Chow, J. C. and Watson, J. G.: Chemical analyses of particle filter deposits. In: *Aerosols Handbook : Measurement,*  
647 *Dosimetry, and Health Effects*, Ruzer, L. and Harley, N. H. (Eds.), CRC Press/Taylor & Francis, New York, NY,  
648 2013.  
649 Chow, J. C. and Watson, J. G.: Enhanced ion chromatographic speciation of water-soluble PM<sub>2.5</sub> to improve aerosol  
650 source apportionment, *Aerosol Science and Engineering*, 1, 7-24, 2017.  
651 Chow, J. C., Watson, J. G., Chen, L.-W. A., Arnott, W. P., Moosmüller, H., and Fung, K. K.: Equivalence of  
652 elemental carbon by Thermal/Optical Reflectance and Transmittance with different temperature protocols, *Environ.*  
653 *Sci. Technol.*, 38, 4414-4422, 2004.  
654 Chow, J. C., Watson, J. G., Chen, L.-W. A., Chang, M.-C. O., Robinson, N. F., Trimble, D. L., and Kohl, S. D.: The  
655 IMPROVE\_A temperature protocol for thermal/optical carbon analysis: Maintaining consistency with a long-term  
656 database, *J. Air Waste Manage. Assoc.*, 57, 1014-1023, 2007.  
657 Chow, J. C., Watson, J. G., Crow, D., Lowenthal, D. H., and Merrifield, T. M.: Comparison of IMPROVE and  
658 NIOSH carbon measurements, *Aerosol Sci. Technol.*, 34, 23-34, 2001.  
659 Chow, J. C., Watson, J. G., Lu, Z., Lowenthal, D. H., Frazier, C. A., Solomon, P. A., Thuillier, R. H., and Magliano,  
660 K. L.: Descriptive analysis of PM<sub>2.5</sub> and PM<sub>10</sub> at regionally representative locations during SJVAQS/AUSPEX,  
661 *Atmos. Environ.*, 30, 2079-2112, 1996.  
662 Dall'Osto, M., Ovadnevaite, J., Ceburnis, D., Martin, D., Healy, R. M., O'Connor, I. P., Kourtchev, I., Sodeau, J. R.,  
663 Wenger, J. C., and O'Dowd, C.: Characterization of urban aerosol in Cork city (Ireland) using aerosol mass  
664 spectrometry, *Atmos. Chem. Phys.*, 13, 4997-5015, 2013.  
665 Falkovich, A. H., Graber, E. R., Schkolnik, G., Rudich, Y., Maenhaut, W., and Artaxo, P.: Low molecular weight  
666 organic acids in aerosol particles from Rondonia, Brazil, during the biomass-burning, transition and wet periods,  
667 *Atmos. Chem. Phys.*, 5, 781-797, 2005.  
668 Frank, N. H.: Retained nitrate, hydrated sulfates, and carbonaceous mass in Federal Reference Method fine  
669 particulate matter for six eastern cities, *J. Air Waste Manage. Assoc.*, 56, 500-511, 2006.  
670 Fujii, Y., Tohno, S., Amil, N., and Latif, M. T.: Quantitative assessment of source contributions to PM<sub>2.5</sub> on the west  
671 coast of Peninsular Malaysia to determine the burden of Indonesian peatland fire, *Atmos. Environ.*, 171, 111-117,  
672 2017.  
673 Hennigan, C. J., Sullivan, A. P., Collett Jr., J. L., and Robinson, A. L.: Levoglucosan stability in biomass burning  
674 particles exposed to hydroxyl radicals, *Geophysical Research Letters*, 37, 1-4, 2010.  
675 Hidy, G. M. and Friedlander, S. K.: The nature of the Los Angeles aerosol. In: *Proceedings, Second International*  
676 *Clean Air Congress*, Englund, H. M. and Beery, W. T. (Eds.), Academic Press, New York, 1971.  
677 Hu, Y. Q., Fernandez-Anez, N., Smith, T. E. L., and Rein, G.: Review of emissions from smouldering peat fires and  
678 their contribution to regional haze episodes, *International Journal of Wildland Fire*, 27, 293-312, 2018.  
679 Iinuma, Y., Bruggemann, E., Gnauk, T., Muller, K., Andreae, M. O., Helas, G., Parmar, R., and Herrmann, H.:  
680 Source characterization of biomass burning particles: The combustion of selected European conifers, African  
681 hardwood, savanna grass, and German and Indonesian peat, *J. Geophys. Res. Atmos.*, 112, 2007.  
682 Jayarathne, T., Stockwell, C. E., Gilbert, A. A., Daugherty, K., Cochrane, M. A., Ryan, K. C., Putra, E. I., Saharjo,  
683 B. H., Nurhayati, A. D., Albar, I., Yokelson, R. J., and Stone, E. A.: Chemical characterization of fine particulate  
684 matter emitted by peat fires in Central Kalimantan, Indonesia, during the 2015 El Nino, *Atmos. Chem. Phys.*, 18,  
685 2585-2600, 2018.  
686 Jimenez, J. L.: Oxidation flow reactors (including PAM): Principles and best practices for applications in aerosol  
687 research, 2018 International Aerosol Conference Tutorial, St. Louis, MO, 2018.  
688 <https://docs.google.com/viewer?a=v&pid=sites&srcid=ZGVmYXVsdGRvbWFpbmxwYW13aWtpfGd4OjY0N2MyYTZkYThiODU0MTM>  
689  
690 Johnson, M. M.: Evaluation of a multiwavelength characterization of brown and black carbon from filter samples,  
691 M.S. Thesis, University of Nevada, Reno, Reno, NV, 2015.  
692 Kang, E., Root, M. J., Toohey, D. W., and Brune, W. H.: Introducing the concept of Potential Aerosol Mass (PAM),  
693 *Atmos. Chem. Phys.*, 7, 5727-5744, 2007.  
694 Kessler, S. H., Smith, J. D., Che, D. L., Worsnop, D. R., Wilson, K. R., and Kroll, J. H.: Chemical sinks of organic  
695 aerosol: Kinetics and products of the heterogeneous oxidation of erythritol and levoglucosan, *Environ. Sci. Technol.*,  
696 44, 7005-7010, 2010.  
697 Kourtchev, I., Hellebust, S., Bell, J. M., O'Connor, I. P., Healy, R. M., Allan, A., Healy, D., Wenger, J. C., and  
698 Sodeau, J. R.: The use of polar organic compounds to estimate the contribution of domestic solid fuel combustion

699 and biogenic sources to ambient levels of organic carbon and PM<sub>2.5</sub> in Cork Harbour, Ireland, *Sci. Total Environ.*,  
700 409, 2143-2155, 2011.

701 Kuo, L. J., Herbert, B. E., and Louchouart, P.: Can levoglucosan be used to characterize and quantify char/charcoal  
702 black carbon in environmental media?, *Organic Geochemistry*, 39, 1466-1478, 2008.

703 Lai, C. Y., Liu, Y. C., Ma, J. Z., Ma, Q. X., and He, H.: Degradation kinetics of levoglucosan initiated by hydroxyl  
704 radical under different environmental conditions, *Atmos. Environ.*, 91, 32-39, 2014.

705 Lambe, A. T., Ahern, A. T., Williams, L. R., Slowik, J. G., Wong, J. P. S., Abbatt, J. P. D., Brune, W. H., Ng, N. L.,  
706 Wright, J. P., Croasdale, D. R., Worsnop, D. R., Davidovits, P., and Onasch, T. B.: Characterization of aerosol  
707 photooxidation flow reactors: heterogeneous oxidation, secondary organic aerosol formation and cloud condensation  
708 nuclei activity measurements, *Atmos. Meas. Tech.*, 4, 445-461, 2011.

709 Li, R., Palm, B. B., Ortega, A. M., Hlywiak, J., Hu, W. W., Peng, Z., Day, D. A., Knote, C., Brune, W. H., de  
710 Gouw, J. A., and Jimenez, J. L.: Modeling the radical chemistry in an oxidation flow reactor: Radical formation and  
711 recycling, sensitivities, and the OH exposure estimation equation, *Journal of Physical Chemistry A*, 119, 4418-4432,  
712 2015.

713 Lin, C. S., Ceburnis, D., Huang, R. J., Canonaco, F., Prevot, A. S. H., O'Dowd, C., and Ovadnevaite, J.:  
714 Summertime aerosol over the west of Ireland dominated by secondary aerosol during long-range transport,  
715 *Atmosphere*, 10, 2019.

716 Liu, Y. Y., Zhang, W. J., Bai, Z. P., Yang, W., Zhao, X. Y., Han, B., and Wang, X. H.: China Source Profile Shared  
717 Service (CSPSS): The Chinese PM<sub>2.5</sub> database for source profiles, *Aerosol Air Qual. Res.*, 17, 1501-1514, 2017.

718 Louchouart, P., Kuo, L. J., Wade, T. L., and Schantz, M.: Determination of levoglucosan and its isomers in size  
719 fractions of aerosol standard reference materials, *Atmos. Environ.*, 43, 5630-5636, 2009.

720 Malm, W. C., Trijonis, J. C., Sisler, J. F., Pitchford, M. L., and Dennis, R. L.: Assessing the effect of SO<sub>2</sub> emission  
721 changes on visibility, *Atmos. Environ.*, 28, 1023-1034, 1994.

722 Mao, J., Ren, X., Brune, W. H., Olson, J. R., Crawford, J. H., Fried, A., Huey, L. G., Cohen, R. C., Heikes, B.,  
723 Singh, H. B., Blake, D. R., Sachse, G. W., Diskin, G. S., Hall, S. R., and Shetter, R. E.: Airborne measurement of  
724 OH reactivity during INTEX-B, *Atmos. Chem. Phys.*, 9, 163-173, 2009.

725 May, A. A., Saleh, R., Hennigan, C. J., Donahue, N. M., and Robinson, A. L.: Volatility of organic molecular  
726 markers used for source apportionment analysis: Measurements and implications for atmospheric lifetime, *Environ.*  
727 *Sci. Technol.*, 46, 12435-12444, 2012.

728 Mo, Z. W., Shao, M., and Lu, S. H.: Compilation of a source profile database for hydrocarbon and OVOC emissions  
729 in China, *Atmos. Environ.*, 143, 209-217, 2016.

730 Nara, H., Tanimoto, H., Tohjima, Y., Mukai, H., Nojiri, Y., and Machida, T.: Emission factors of CO<sub>2</sub>, CO and CH<sub>4</sub>  
731 from Sumatran peatland fires in 2013 based on shipboard measurements, *Tellus Series B-Chemical and Physical*  
732 *Meteorology*, 69, 2017.

733 PAMWiki: PAMWiki, 2019. <https://sites.google.com/site/pamwiki/>

734 Pant, P., Shukla, A., Kohl, S. D., Chow, J. C., Watson, J. G., and Harrison, R. M.: Characterization of ambient PM<sub>2.5</sub>  
735 at a pollution hotspot in New Delhi, India and inference of sources, *Atmos. Environ.*, 109, 178-189, 2015.

736 Peng, Z., Day, D. A., Ortega, A. M., Palm, B. B., Hu, W. W., Stark, H., Li, R., Tsigaridis, K., Brune, W. H., and  
737 Jimenez, J. L.: Non-OH chemistry in oxidation flow reactors for the study of atmospheric chemistry systematically  
738 examined by modeling, *Atmos. Chem. Phys.*, 16, 4283-4305, 2016.

739 Peng, Z., Day, D. A., Stark, H., Li, R., Lee-Taylor, J., Palm, B. B., Brune, W. H., and Jimenez, J. L.: HO<sub>x</sub> radical  
740 chemistry in oxidation flow reactors with low-pressure mercury lamps systematically examined by modeling,  
741 *Atmos. Meas. Tech.*, 8, 4863-4890, 2015.

742 Peng, Z. and Jimenez, J. L.: Modeling of the chemistry in oxidation flow reactors with high initial NO, *Atmos.*  
743 *Chem. Phys.*, 17, 11991-12010, 2017.

744 Peng, Z., Palm, B. B., Day, D. A., Talukdar, R. K., Hu, W. W., Lambe, A. T., Brune, W. H., and Jimenez, J. L.:  
745 Model evaluation of new techniques for maintaining high-NO conditions in oxidation flow reactors for the study of  
746 OH-initiated atmospheric chemistry, *Acs Earth and Space Chemistry*, 2, 72-86, 2018.

747 Pernigotti, D., Belis, C. A., and Spanò, L.: SPECIEUROPE: The European data base for PM source profiles,  
748 *Atmospheric Pollution Research*, 7, 307-314, 2016.

749 Pratap, V., Bian, Q. J., Kiran, S. A., Hopke, P. K., Pierce, J. R., and Nakao, S.: Investigation of levoglucosan decay  
750 in wood smoke smog-chamber experiments: The importance of aerosol loading, temperature, and vapor wall losses  
751 in interpreting results, *Atmos. Environ.*, 199, 224-232, 2019.

752 Reid, J. S., Eck, T. F., Christopher, S. A., Koppmann, R., Dubovik, O., Eleuterio, D. P., Holben, B. N., Reid, E. A.,  
753 and Zhang, J.: A review of biomass burning emissions part III: intensive optical properties of biomass burning  
754 particles, *Atmos. Chem. Phys.*, 5, 827-849, 2005.



755 Riggio, G. M., Chow, J. C., Cropper, P. M., Wang, X. L., Yatavelli, R. L. N., Yang, X. F., and Watson, J. G.:  
756 Feasibility of coupling a thermal/optical carbon analyzer to a quadrupole mass spectrometer for enhanced PM<sub>2.5</sub>  
757 speciation, *J. Air Waste Manage. Assoc.*, 68, 463-476, 2018.

758 Rogula-Kozłowska, W., Klejnowski, K., Rogula-Kopiec, P., Mathews, B., and Szopa, S.: A study on the seasonal  
759 mass closure of ambient fine and coarse dusts in Zabrze, Poland, *Bulletin of Environmental Contamination and*  
760 *Toxicology*, 88, 722-729, 2012.

761 See, S. W., Balasubramanian, R., Rianawati, E., Karthikeyan, S., and Streets, D. G.: Characterization and source  
762 apportionment of particulate matter  $\leq 2.5 \mu\text{m}$  in Sumatra, Indonesia, during a recent peat fire episode, *Environ.*  
763 *Sci. Technol.*, 41, 3488-3494, 2007.

764 Smith, J. D., Kroll, J. H., Cappa, C. D., Che, D. L., Liu, C. L., Ahmed, M., Leone, S. R., Worsnop, D. R., and  
765 Wilson, K. R.: The heterogeneous reaction of hydroxyl radicals with sub-micron squalane particles: a model system  
766 for understanding the oxidative aging of ambient aerosols, *Atmos. Chem. Phys.*, 9, 3209-3222, 2009.

767 Stockwell, C. E., Jayarathne, T., Cochrane, M. A., Ryan, K. C., Putra, E. I., Saharjo, B. H., Nurhayati, A. D., Albar,  
768 I., Blake, D. R., Simpson, I. J., Stone, E. A., and Yokelson, R. J.: Field measurements of trace gases and aerosols  
769 emitted by peat fires in Central Kalimantan, Indonesia, during the 2015 El Niño, *Atmos. Chem. Phys.*, 16, 11711-  
770 11732, 2016.

771 Stockwell, C. E., Yokelson, R. J., Kreidenweis, S. M., Robinson, A. L., Demott, P. J., Sullivan, R. C., Reardon, J.,  
772 Ryan, K. C., Griffith, D. W. T., and Stevens, L.: Trace gas emissions from combustion of peat, crop residue,  
773 domestic biofuels, grasses, and other fuels: configuration and Fourier transform infrared (FTIR) component of the  
774 fourth Fire Lab at Missoula Experiment (FLAME-4), *Atmos. Chem. Phys.*, 14, 9727-9754, 2014.

775 Stone, D., Whalley, L. K., and Heard, D. E.: Tropospheric OH and HO<sub>2</sub> radicals: field measurements and model  
776 comparisons, *Chemical Society Reviews*, 41, 6348-6404, 2012.

777 Tham, J., Sarkar, S., Jia, S. G., Reid, J. S., Mishra, S., Sudiana, I. M., Swarup, S., Ong, C. N., and Yu, L. Y. E.:  
778 Impacts of peat-forest smoke on urban PM<sub>2.5</sub> in the Maritime Continent during 2012-2015: Carbonaceous profiles  
779 and indicators, *Environ. Pollut.*, 248, 496-505, 2019.

780 Tian, J., Chow, J. C., Cao, J. J., Han, Y. M., Ni, H. Y., Chen, L.-W. A., Wang, X. L., Huang, R. J., Moosmüller, H.,  
781 and Watson, J. G.: A biomass combustion chamber: Design, evaluation, and a case study of wheat straw combustion  
782 emission tests, *Aerosol Air Qual. Res.*, 15, 2104-2114, 2015.

783 U.S.EPA: Guidance on the use of models and other analyses for demonstrating attainment of air quality goals for  
784 ozone, PM<sub>2.5</sub>, and regional haze, U.S. Environmental Protection Agency, Research Triangle Park, NC, 2007.  
785 <http://www.epa.gov/ttn/scram/guidance/guide/final-03-pm-rh-guidance.pdf>

786 U.S.EPA: SPECIATE Version 5.0, U.S. Environmental Protection Agency, Research Triangle Park, NC, 2019.  
787 <https://www.epa.gov/air-emissions-modeling/speciate-version-45-through-40>

788 Veres, P., Roberts, J. M., Burling, I. R., Warneke, C., de Gouw, J., and Yokelson, R. J.: Measurements of gas-phase  
789 inorganic and organic acids from biomass fires by negative-ion proton-transfer chemical-ionization mass  
790 spectrometry, *J. Geophys. Res. Atmos.*, 115, 2010.

791 Watson, J. G.: Protocol for applying and validating the CMB model for PM<sub>2.5</sub> and VOC, U.S. Environmental  
792 Protection Agency, Research Triangle Park, NC, 2004. [www.epa.gov/scram001/models/receptor/CMB\\_Protocol.pdf](http://www.epa.gov/scram001/models/receptor/CMB_Protocol.pdf)

793 Watson, J. G., Cao, J., Wang, Q., Tan, J., Li, L., Ho, S. S. H., Chen, L.-W. A., Watts, A. C., Wang, X. L., and Chow,  
794 J. C.: Gaseous, PM<sub>2.5</sub> mass, and speciated emission factors from laboratory chamber peat combustion, *Atmospheric*  
795 *Chemistry and Physics Discussion*, doi: 10.5194/acp-2019-456, 2019. online, 2019.

796 Watson, J. G., Chow, J. C., Engling, G., Chen, L.-W. A., and Wang, X. L.: Source apportionment: Principles and  
797 methods. In: *Airborne Particulate Matter: Sources, Atmospheric Processes and Health*, Harrison, R. M. (Ed.), Royal  
798 Society of Chemistry, London, UK, 2016.

799 Watson, J. G., Chow, J. C., and Frazier, C. A.: X-ray fluorescence analysis of ambient air samples. In: *Elemental*  
800 *Analysis of Airborne Particles*, Vol. 1, Landsberger, S. and Creatchman, M. (Eds.), Advances in Environmental,  
801 Industrial and Process Control Technologies, Gordon and Breach Science, Amsterdam, The Netherlands, 1999.

802 Watson, J. G., Chow, J. C., Wang, X. L., Kohl, S. D., Chen, L.-W. A., and Etyemezian, V. R.: Overview of real-  
803 world emission characterization methods. In: *Alberta Oil Sands: Energy, Industry, and the Environment*, Percy, K.  
804 E. (Ed.), Developments in Environmental Science, Elsevier Press, Amsterdam, The Netherlands, 2012.

805 Watson, J. G., Tropp, R. J., Kohl, S. D., Wang, X. L., and Chow, J. C.: Filter processing and gravimetric analysis for  
806 suspended particulate matter samples, *Aerosol Science and Engineering*, 1, 193-205, 2017.

807 Watson, J. G., Turpin, B. J., and Chow, J. C.: The measurement process: Precision, accuracy, and validity. In: *Air*  
808 *Sampling Instruments for Evaluation of Atmospheric Contaminants*, Ninth Edition, Cohen, B. S. and McCammon,  
809 C. S., Jr (Eds.), American Conference of Governmental Industrial Hygienists, Cincinnati, OH, 2001.

810 Wiggins, E. B., Czimczik, C. I., Santos, G. M., Chen, Y., Xu, X. M., Holden, S. R., Randerson, J. T., Harvey, C. F.,  
811 Kai, F. M., and Yu, L. E.: Smoke radiocarbon measurements from Indonesian fires provide evidence for burning of  
812 millennia-aged peat, *Proceedings of the National Academy of Sciences of the United States of America*, 115, 12419-  
813 12424, 2018.  
814

815 Table 1. Average fresh and aged peat combustion source profiles (in % of PM<sub>2.5</sub> mass) for six types of peats

| Average ± Standard Deviation of Percent PM <sub>2.5</sub> Mass <sup>a</sup>                                          |                           |                   |                           |                   |                           |                     |                           |                  |
|----------------------------------------------------------------------------------------------------------------------|---------------------------|-------------------|---------------------------|-------------------|---------------------------|---------------------|---------------------------|------------------|
| Boreal                                                                                                               |                           |                   |                           |                   |                           |                     |                           |                  |
| Odintsovo, Russia                                                                                                    |                           |                   |                           | Pskov, Siberia    |                           |                     |                           |                  |
| Aging Time                                                                                                           | 2 days                    |                   | 7 days                    |                   | 2 days                    |                     | 7 days                    |                  |
|                                                                                                                      | Fresh 2                   | Aged 2            | Fresh 7                   | Aged 7            | Fresh 2                   | Aged 2 <sup>b</sup> | Fresh 7                   | Aged 7           |
| Peat IDs in the average <sup>c</sup>                                                                                 | PEAT030, PEAT031, PEAT032 |                   | PEAT033, PEAT034, PEAT035 |                   | PEAT023, PEAT025, PEAT026 |                     | PEAT027, PEAT028, PEAT029 |                  |
| Nitric Acid (HNO <sub>3</sub> )                                                                                      | 0.18 ± 0.080              | 0.32 ± 0.15       | 0.21 ± 0.059              | 0.24 ± 0.085      | 0.18 ± 0.052              | 0.27 ± 0.074        | 0.27 ± 0.075              | 0.39 ± 0.15      |
| Ammonia (NH <sub>3</sub> )                                                                                           | 6.0095 ± 0.93             | 3.21 ± 0.78       | 7.84 ± 0.31               | 4.56 ± 1.36       | 18.21 ± 3.97              | 8.81 ± 4.047        | 22.81 ± 5.88              | 7.090 ± 5.59     |
| Water-Soluble Sodium (Na <sup>+</sup> )                                                                              | 0.018 ± 0.0015            | 0.024 ± 0.0013    | 0.022 ± 0.011             | 0.032 ± 0.0074    | 0.017 ± 0.0011            | 0.047 ± 0.020       | 0.0688 ± 0.038            | 0.058 ± 0.053    |
| Water-Soluble Potassium (K <sup>+</sup> )                                                                            | 0.034 ± 0.036             | na <sup>d</sup>   | 0.11 ± 0.087              | na <sup>d</sup>   | 0.020 ± 0.016             | na <sup>d</sup>     | 0.0230 ± 0.014            | na <sup>d</sup>  |
| Chloride (Cl <sup>-</sup> )                                                                                          | 0.16 ± 0.022              | 0.12 ± 0.019      | 0.25 ± 0.053              | 0.092 ± 0.011     | 0.11 ± 0.031              | 0.11 ± 0.048        | 0.17 ± 0.014              | 0.086 ± 0.033    |
| Nitrite (NO <sub>2</sub> <sup>-</sup> )                                                                              | 0.037 ± 0.063             | 0.00095 ± 0.0016  | 0.00 ± 0.00028            | 0.00086 ± 0.00077 | 0.0013 ± 0.0023           | 0.0023 ± 0.0036     | 0.20 ± 0.34               | 0.0056 ± 0.0033  |
| Nitrate (NO <sub>3</sub> <sup>-</sup> )                                                                              | 0.23 ± 0.20               | 0.74 ± 0.080      | 0.13 ± 0.043              | 2.0029 ± 0.71     | 0.11 ± 0.11               | 1.79 ± 0.52         | 0.15 ± 0.076              | 8.23 ± 4.34      |
| Sulfate (SO <sub>4</sub> <sup>2-</sup> )                                                                             | 0.30 ± 0.33               | 0.67 ± 0.46       | 0.15 ± 0.044              | 0.84 ± 0.24       | 0.28 ± 0.15               | 0.68 ± 0.19         | 0.27 ± 0.025              | 1.15 ± 0.63      |
| Ammonium (NH <sub>4</sub> <sup>+</sup> )                                                                             | 0.13 ± 0.14               | 1.045 ± 0.93      | 0.097 ± 0.057             | 3.38 ± 1.38       | 0.0014 ± 0.0012           | 0.21 ± 0.18         | 0.0463 ± 0.044            | 6.66 ± 3.67      |
| OC1 (140°C)                                                                                                          | 11.82 ± 2.58              | 6.42 ± 3.94       | 15.67 ± 3.60              | 4.096 ± 0.72      | 11.81 ± 2.20              | 5.014 ± 0.70        | 11.40 ± 0.65              | 4.34 ± 1.69      |
| OC2 (280°C)                                                                                                          | 13.16 ± 1.42              | 9.84 ± 1.094      | 12.029 ± 1.049            | 9.032 ± 1.27      | 20.59 ± 1.87              | 15.45 ± 2.65        | 21.21 ± 2.38              | 10.54 ± 0.18     |
| OC3 (480°C)                                                                                                          | 17.69 ± 3.013             | 14.60 ± 1.93      | 17.33 ± 2.39              | 13.99 ± 2.46      | 25.93 ± 3.62              | 26.78 ± 8.46        | 29.63 ± 5.62              | 19.74 ± 0.79     |
| OC4 (580°C)                                                                                                          | 6.69 ± 0.49               | 5.83 ± 0.51       | 6.090 ± 1.61              | 4.40 ± 0.84       | 5.79 ± 0.21               | 8.85 ± 1.27         | 8.72 ± 3.83               | 6.31 ± 2.35      |
| Pyrolyzed Carbon (OP)                                                                                                | 8.26 ± 2.086              | 8.61 ± 4.35       | 9.29 ± 1.0016             | 9.39 ± 1.30       | 9.52 ± 2.15               | 12.12 ± 4.27        | 10.34 ± 1.82              | 12.76 ± 1.58     |
| Organic Carbon (OC) <sup>e</sup>                                                                                     | 57.61 ± 5.21              | 45.29 ± 9.90      | 60.42 ± 5.37              | 40.90 ± 4.87      | 73.65 ± 6.82              | 68.21 ± 13.33       | 81.30 ± 9.29              | 53.69 ± 5.32     |
| EC1 (580°C)                                                                                                          | 6.47 ± 1.64               | 6.77 ± 2.33       | 6.51 ± 0.53               | 9.31 ± 1.50       | 7.84 ± 2.19               | 9.23 ± 0.82         | 5.31 ± 0.57               | 7.79 ± 1.28      |
| EC2 (740°C)                                                                                                          | 3.60 ± 2.32               | 3.36 ± 2.52       | 4.61 ± 0.034              | 2.051 ± 0.50      | 4.92 ± 3.76               | 5.98 ± 4.73         | 5.87 ± 0.74               | 7.038 ± 2.48     |
| EC3 (840°C)                                                                                                          | 0.00 ± 0.00020            | 0.00 ± 0.00022    | 0.00 ± 0.00020            | 0.00 ± 0.00021    | 0.00 ± 0.00021            | 0.00 ± 0.00028      | 0.00 ± 0.00029            | 0.00 ± 0.00032   |
| Elemental Carbon (EC) <sup>f</sup>                                                                                   | 1.82 ± 1.26               | 1.52 ± 0.36       | 1.83 ± 0.69               | 1.98 ± 0.75       | 3.23 ± 0.80               | 3.090 ± 0.83        | 0.83 ± 1.30               | 2.076 ± 0.36     |
| Total Carbon (TC)                                                                                                    | 59.43 ± 4.49              | 46.81 ± 10.23     | 62.25 ± 4.95              | 42.88 ± 4.76      | 76.88 ± 6.37              | 71.30 ± 13.96       | 82.14 ± 10.57             | 55.77 ± 5.58     |
| Water-Soluble OC (WSOC)                                                                                              | 36.97 ± 2.71              | 31.80 ± 3.15      | 35.77 ± 2.30              | 29.21 ± 6.31      | 23.84 ± 1.84              | 29.88 ± 7.10        | 32.50 ± 0.71 <sup>e</sup> | 29.88 ± 8.88     |
| Formic acid (CH <sub>2</sub> O <sub>2</sub> )                                                                        | 0.17 ± 0.074              | 0.23 ± 0.054      | 0.23 ± 0.090              | 0.32 ± 0.18       | 0.045 ± 0.016             | 0.18 ± 0.054        | 0.067 ± 0.0097            | 0.44 ± 0.28      |
| Acetic acid (C <sub>2</sub> H <sub>4</sub> O <sub>2</sub> )                                                          | 0.61 ± 0.38               | 0.63 ± 0.37       | 0.67 ± 0.15               | 0.88 ± 0.47       | 0.20 ± 0.16               | 0.34 ± 0.15         | 0.23 ± 0.15               | 1.46 ± 2.03      |
| Oxalic acid (C <sub>2</sub> H <sub>2</sub> O <sub>4</sub> )                                                          | 0.10 ± 0.063              | 0.97 ± 0.20       | 0.28 ± 0.22               | 2.88 ± 0.77       | 0.062 ± 0.013             | 1.31 ± 0.47         | 0.076 ± 0.019             | 3.90 ± 1.43      |
| Propionic acid (C <sub>3</sub> H <sub>5</sub> O <sub>2</sub> )                                                       | 0.036 ± 0.032             | 0.12 ± 0.15       | 0.066 ± 0.032             | 0.020 ± 0.031     | 0.00 ± 0.00015            | 0.026 ± 0.045       | 0.032 ± 0.032             | 0.00 ± 0.00023   |
| Levoglucosan (C <sub>6</sub> H <sub>10</sub> O <sub>5</sub> )                                                        | 35.35 ± 7.90              | 24.95 ± 8.97      | 38.66 ± 2.089             | 19.63 ± 4.044     | 6.66 ± 2.58               | 4.21 ± 0.59         | 9.39 ± 2.077              | 3.80 ± 0.35      |
| Mannosan (C <sub>6</sub> H <sub>10</sub> O <sub>5</sub> )                                                            | 3.93 ± 1.18               | 2.52 ± 1.068      | 5.039 ± 0.58              | 2.14 ± 0.85       | 0.053 ± 0.092             | 0.00 ± 0.00044      | 1.28 ± 0.54               | 0.46 ± 0.16      |
| Galactose/Maltitol (C <sub>6</sub> H <sub>12</sub> O <sub>6</sub> /C <sub>12</sub> H <sub>24</sub> O <sub>11</sub> ) | 0.00 ± 0.00016            | 0.00 ± 0.00017    | 0.063 ± 0.11              | 0.00 ± 0.00016    | 0.0058 ± 0.010            | 0.00 ± 0.00023      | 0.00 ± 0.00023            | 0.082 ± 0.14     |
| Glycerol (C <sub>3</sub> H <sub>8</sub> O <sub>3</sub> )                                                             | 1.90 ± 0.19               | 1.73 ± 0.42       | 3.54 ± 2.14               | 1.25 ± 0.17       | 0.00 ± 0.0000029          | 0.00 ± 0.0000040    | 0.43 ± 0.43               | 0.00 ± 0.0000046 |
| Mannitol (C <sub>6</sub> H <sub>14</sub> O <sub>6</sub> )                                                            | 0.00 ± 0.000056           | 0.00 ± 0.000061   | 0.062 ± 0.11              | 0.00 ± 0.000058   | 0.00 ± 0.000058           | 0.00 ± 0.000081     | 0.00 ± 0.0000836          | 0.17 ± 0.30      |
| Aluminum (Al)                                                                                                        | 0.073 ± 0.66              | 0.15 ± 0.87       | 0.22 ± 0.73               | 0.29 ± 2.74       | 0.086 ± 1.49              | 0.00 ± 0.0074       | 0.075 ± 0.83              | 0.20 ± 0.17      |
| Silicon (Si)                                                                                                         | 0.0069 ± 0.12             | 0.12 ± 0.44       | 0.013 ± 0.12              | 0.68 ± 0.24       | 0.022 ± 0.19              | 0.22 ± 0.00089      | 0.0050 ± 0.044            | 0.47 ± 0.79      |
| Phosphorous (P)                                                                                                      | 0.00 ± 0.000084           | 0.00018 ± 0.00025 | 0.00079 ± 0.0014          | 0.00 ± 0.000095   | 0.00 ± 0.000090           | 0.00 ± 0.00017      | 0.00 ± 0.00012            | 0.00 ± 0.000093  |

817 Table 1 (cont'd)

| Average ± Standard Deviation of Percent PM <sub>2.5</sub> Mass <sup>a</sup> |                           |                     |                           |                   |                           |                     |                           |                   |
|-----------------------------------------------------------------------------|---------------------------|---------------------|---------------------------|-------------------|---------------------------|---------------------|---------------------------|-------------------|
| Boreal                                                                      |                           |                     |                           |                   |                           |                     |                           |                   |
| Odintsovo, Russia                                                           |                           |                     |                           | Pskov, Siberia    |                           |                     |                           |                   |
| Aging Time                                                                  | 2 days                    |                     | 7 days                    |                   | 2 days                    |                     | 7 days                    |                   |
|                                                                             | Fresh 2                   | Aged 2              | Fresh 7                   | Aged 7            | Fresh 2                   | Aged 2 <sup>b</sup> | Fresh 7                   | Aged 7            |
| Peat IDs in the average <sup>c</sup>                                        | PEAT030, PEAT031, PEAT032 |                     | PEAT033, PEAT034, PEAT035 |                   | PEAT023, PEAT025, PEAT026 |                     | PEAT027, PEAT028, PEAT029 |                   |
| Sulfur (S)                                                                  | 0.024 ± 0.0088            | 0.081 ± 0.046       | 0.040 ± 0.056             | 0.26 ± 0.095      | 0.081 ± 0.030             | 0.090 ± 0.000098    | 0.028 ± 0.034             | 0.31 ± 0.0057     |
| Chlorine (Cl)                                                               | 0.12 ± 0.027              | 0.035 ± 0.019       | 0.18 ± 0.030              | 0.032 ± 0.0025    | 0.11 ± 0.015              | 0.057 ± 0.000068    | 0.081 ± 0.018             | 0.027 ± 0.0064    |
| Potassium (K)                                                               | 0.030 ± 0.011             | 0.48 ± 0.44         | 0.041 ± 0.018             | 0.13 ± 0.035      | 0.15 ± 0.19               | 0.096 ± 0.00025     | 0.11 ± 0.14               | 0.30 ± 0.017      |
| Calcium (Ca)                                                                | 0.018 ± 0.016             | 0.040 ± 0.056       | 0.031 ± 0.025             | 0.0034 ± 0.0048   | 0.00 ± 0.00               | 0.00 ± 0.00092      | 0.00 ± 0.00065            | 0.028 ± 0.039     |
| Scandium (Sc)                                                               | 0.064 ± 0.11              | 0.00 ± 0.0021       | 0.00 ± 0.0021             | 0.00 ± 0.0023     | 0.079 ± 0.14              | 0.00 ± 0.0041       | 0.031 ± 0.053             | 0.00 ± 0.0022     |
| Titanium (Ti)                                                               | 0.0046 ± 0.0056           | 0.00 ± 0.000076     | 0.0055 ± 0.0049           | 0.0013 ± 0.0018   | 0.0079 ± 0.014            | 0.00 ± 0.00015      | 0.00 ± 0.00010            | 0.00 ± 0.000078   |
| Vanadium (V)                                                                | 0.00 ± 0.000013           | 0.00 ± 0.000014     | 0.00 ± 0.000014           | 0.00 ± 0.000015   | 0.00070 ± 0.0012          | 0.00 ± 0.000027     | 0.00 ± 0.000019           | 0.00 ± 0.000015   |
| Chromium (Cr)                                                               | 0.0012 ± 0.0020           | 0.00039 ± 0.00056   | 0.00 ± 0.000046           | 0.00084 ± 0.0012  | 0.00079 ± 0.0014          | 0.00 ± 0.000091     | 0.0010 ± 0.00095          | 0.00 ± 0.000049   |
| Manganese (Mn)                                                              | 0.0014 ± 0.0022           | 0.00053 ± 0.00074   | 0.0037 ± 0.0033           | 0.00 ± 0.00018    | 0.0018 ± 0.0022           | 0.020 ± 0.00032     | 0.0031 ± 0.0031           | 0.0051 ± 0.0072   |
| Iron (Fe)                                                                   | 0.038 ± 0.021             | 0.091 ± 0.098       | 0.062 ± 0.043             | 0.26 ± 0.32       | 0.039 ± 0.035             | 0.029 ± 0.00056     | 0.013 ± 0.017             | 0.015 ± 0.021     |
| Cobalt (Co)                                                                 | 0.000032 ± 0.000056       | 0.00 ± 0.000094     | 0.000037 ± 0.000064       | 0.00049 ± 0.00069 | 0.00018 ± 0.00031         | 0.00 ± 0.000018     | 0.00 ± 0.000013           | 0.00 ± 0.000018   |
| Nickel (Ni)                                                                 | 0.00 ± 0.000022           | 0.0026 ± 0.0037     | 0.000029 ± 0.000050       | 0.00 ± 0.000025   | 0.00 ± 0.000024           | 0.00086 ± 0.000045  | 0.0014 ± 0.0017           | 0.00041 ± 0.00039 |
| Copper (Cu)                                                                 | 0.0055 ± 0.0029           | 0.15 ± 0.11         | 0.0052 ± 0.0038           | 0.046 ± 0.054     | 0.0072 ± 0.0041           | 0.014 ± 0.00028     | 0.047 ± 0.052             | 0.11 ± 0.067      |
| Zinc (Zn)                                                                   | 0.0017 ± 0.0015           | 0.054 ± 0.066       | 0.0047 ± 0.0041           | 0.053 ± 0.070     | 0.0053 ± 0.0030           | 0.0034 ± 0.00016    | 0.0058 ± 0.0056           | 0.0019 ± 0.00081  |
| Arsenic (As)                                                                | 0.00086 ± 0.0015          | 0.00 ± 0.000038     | 0.00 ± 0.000037           | 0.00 ± 0.000040   | 0.00076 ± 0.0013          | 0.0050 ± 0.00073    | 0.000069 ± 0.00012        | 0.00013 ± 0.00019 |
| Selenium (Se)                                                               | 0.00021 ± 0.00036         | 0.0026 ± 0.0037     | 0.00067 ± 0.00076         | 0.00029 ± 0.00041 | 0.0018 ± 0.0022           | 0.0026 ± 0.00013    | 0.00035 ± 0.00031         | 0.00029 ± 0.00041 |
| Bromine (Br)                                                                | 0.00041 ± 0.00036         | 0.0030 ± 0.0031     | 0.00096 ± 0.0014          | 0.0021 ± 0.0019   | 0.0072 ± 0.0043           | 0.0032 ± 0.000036   | 0.0092 ± 0.0066           | 0.0066 ± 0.0014   |
| Rubidium (Rb)                                                               | 0.00052 ± 0.00090         | 0.0029 ± 0.000079   | 0.0020 ± 0.0019           | 0.00049 ± 0.00069 | 0.00031 ± 0.00054         | 0.00 ± 0.000045     | 0.00066 ± 0.00068         | 0.0024 ± 0.0034   |
| Strontium (Sr)                                                              | 0.0033 ± 0.0032           | 0.0017 ± 0.0018     | 0.0032 ± 0.0027           | 0.0033 ± 0.0013   | 0.0027 ± 0.0028           | 0.0039 ± 0.000045   | 0.0072 ± 0.0042           | 0.0047 ± 0.0066   |
| Yttrium (Y)                                                                 | 0.00079 ± 0.0013          | 0.000066 ± 0.000093 | 0.0031 ± 0.0035           | 0.00077 ± 0.0011  | 0.0014 ± 0.0012           | 0.0015 ± 0.000045   | 0.0045 ± 0.0045           | 0.0053 ± 0.0049   |
| Zirconium (Zr)                                                              | 0.0040 ± 0.0024           | 0.0034 ± 0.0014     | 0.0013 ± 0.0018           | 0.0017 ± 0.0024   | 0.0051 ± 0.0019           | 0.00 ± 0.00017      | 0.0060 ± 0.0088           | 0.0033 ± 0.0021   |
| Niobium (Nb)                                                                | 0.00072 ± 0.0012          | 0.0023 ± 0.0013     | 0.00036 ± 0.00038         | 0.00063 ± 0.00089 | 0.00040 ± 0.00069         | 0.00064 ± 0.000082  | 0.00039 ± 0.00067         | 0.00044 ± 0.00062 |
| Molybdenum (Mo)                                                             | 0.0020 ± 0.0035           | 0.00 ± 0.000090     | 0.0015 ± 0.0011           | 0.0030 ± 0.0010   | 0.0029 ± 0.0051           | 0.00 ± 0.00017      | 0.0013 ± 0.0022           | 0.0026 ± 0.0037   |
| Silver (Ag)                                                                 | 0.0010 ± 0.0015           | 0.00 ± 0.00011      | 0.00 ± 0.00011            | 0.00 ± 0.00012    | 0.00 ± 0.00011            | 0.00 ± 0.00022      | 0.0083 ± 0.0074           | 0.00 ± 0.00012    |
| Cadmium (Cd)                                                                | 0.0034 ± 0.0059           | 0.0038 ± 0.0053     | 0.0023 ± 0.0039           | 0.0023 ± 0.0033   | 0.00 ± 0.00016            | 0.00 ± 0.00030      | 0.0024 ± 0.0029           | 0.00 ± 0.00016    |
| Indium (In)                                                                 | 0.00 ± 0.00010            | 0.00 ± 0.00011      | 0.0059 ± 0.0011           | 0.0060 ± 0.0016   | 0.00065 ± 0.0011          | 0.018 ± 0.00021     | 0.0027 ± 0.0047           | 0.00 ± 0.00011    |
| Tin (Sn)                                                                    | 0.0028 ± 0.0048           | 0.0095 ± 0.013      | 0.0013 ± 0.0022           | 0.0037 ± 0.0053   | 0.0098 ± 0.010            | 0.0075 ± 0.00038    | 0.0092 ± 0.014            | 0.0089 ± 0.013    |
| Antimony (Sb)                                                               | 0.00 ± 0.00028            | 0.0086 ± 0.012      | 0.00 ± 0.00029            | 0.00 ± 0.00032    | 0.00 ± 0.00030            | 0.000053 ± 0.00058  | 0.00 ± 0.00041            | 0.00 ± 0.00031    |
| Cesium (Cs)                                                                 | 0.025 ± 0.040             | 0.0085 ± 0.012      | 0.023 ± 0.033             | 0.014 ± 0.020     | 0.0057 ± 0.0099           | 0.00 ± 0.0016       | 0.0046 ± 0.0079           | 0.00 ± 0.00086    |
| Barium (Ba)                                                                 | 0.014 ± 0.024             | 0.00 ± 0.00071      | 0.011 ± 0.020             | 0.00 ± 0.00068    | 0.023 ± 0.020             | 0.00 ± 0.0012       | 0.00 ± 0.00086            | 0.00 ± 0.00067    |
| Lanthanum (La)                                                              | 0.048 ± 0.043             | 0.00 ± 0.0012       | 0.049 ± 0.043             | 0.059 ± 0.083     | 0.017 ± 0.030             | 0.00 ± 0.0024       | 0.094 ± 0.085             | 0.020 ± 0.028     |
| Wolfram (W)                                                                 | 0.0023 ± 0.0014           | 0.0073 ± 0.010      | 0.0077 ± 0.013            | 0.011 ± 0.0016    | 0.00079 ± 0.0014          | 0.00 ± 0.00047      | 0.0047 ± 0.0082           | 0.0048 ± 0.00054  |
| Gold (Au)                                                                   | 0.0029 ± 0.0027           | 0.00 ± 0.000071     | 0.00080 ± 0.0014          | 0.0024 ± 0.0033   | 0.00 ± 0.000071           | 0.012 ± 0.00014     | 0.0038 ± 0.0065           | 0.0018 ± 0.0025   |
| Mercury (Hg)                                                                | 0.0015 ± 0.0014           | 0.00 ± 0.000038     | 0.00081 ± 0.0014          | 0.00 ± 0.000040   | 0.0013 ± 0.0023           | 0.00 ± 0.000073     | 0.000065 ± 0.00011        | 0.00 ± 0.000039   |
| Lead (Pb)                                                                   | 0.0026 ± 0.0024           | 0.0018 ± 0.0025     | 0.0024 ± 0.0028           | 0.0053 ± 0.0074   | 0.00 ± 0.000071           | 0.00 ± 0.00014      | 0.0050 ± 0.00088          | 0.0027 ± 0.0032   |
| Uranium (U)                                                                 | 0.0018 ± 0.0031           | 0.0017 ± 0.0024     | 0.00096 ± 0.0017          | 0.0024 ± 0.0035   | 0.0028 ± 0.0027           | 0.00 ± 0.00025      | 0.0025 ± 0.0033           | 0.0046 ± 0.0066   |

818 Table 1 (cont'd)

| Aging Time                                                                                                           | Average ± Standard Deviation of Percent PM <sub>2.5</sub> Mass |                 |                     |                  |                                      |                  |                    |                  |
|----------------------------------------------------------------------------------------------------------------------|----------------------------------------------------------------|-----------------|---------------------|------------------|--------------------------------------|------------------|--------------------|------------------|
|                                                                                                                      | Temperate                                                      |                 |                     |                  | Subtropical                          |                  |                    |                  |
|                                                                                                                      | Northern Alaska, USA                                           |                 |                     |                  | Putnam County Lakebed, Florida (FL1) |                  |                    |                  |
|                                                                                                                      | 2 days                                                         |                 | 7 days              |                  | 2 (25%) days                         |                  | 7 (25%) days       |                  |
| Fresh 2                                                                                                              | Aged 2                                                         | Fresh 7         | Aged 7 <sup>b</sup> | Fresh 2          | Aged 2                               | Fresh 7          | Aged 7             |                  |
| Peat IDs in the average <sup>c</sup>                                                                                 | PEAT013, PEAT014, PEAT019                                      |                 | PEAT020, PEAT022    |                  | PEAT008, PEAT009                     |                  | PEAT005, PEAT006   |                  |
| Nitric Acid (HNO <sub>3</sub> )                                                                                      | 0.40 ± 0.19                                                    | 0.31 ± 0.15     | 0.29 ± 0.22         | 0.28 ± 0.10      | 0.18 ± 0.033                         | 0.39 ± 0.17      | 0.32 ± 0.25        | 0.23 ± 0.0055    |
| Ammonia (NH <sub>3</sub> )                                                                                           | 16.64 ± 8.41                                                   | 6.39 ± 3.76     | 27.73 ± 11.16       | 5.13 ± 0.80      | 28.03 ± 2.90                         | 4.76 ± 0.52      | na <sup>f</sup>    | 1.39 ± 0.62      |
| Water-Soluble Sodium (Na <sup>+</sup> )                                                                              | 0.047 ± 0.035                                                  | 0.13 ± 0.15     | 0.047 ± 0.036       | 0.053 ± 0.022    | 0.015 ± 0.00033                      | 0.033 ± 0.00033  | 0.030 ± 0.0058     | 0.032 ± 0.0048   |
| Water-Soluble Potassium (K <sup>+</sup> )                                                                            | 0.042 ± 0.068                                                  | na <sup>d</sup> | 0.035 ± 0.010       | na <sup>d</sup>  | 0.010 ± 0.015                        | na <sup>d</sup>  | 0.029 ± 0.0042     | na <sup>d</sup>  |
| Chloride (Cl <sup>-</sup> )                                                                                          | 0.21 ± 0.050                                                   | 0.25 ± 0.19     | 0.29 ± 0.029        | 0.11 ± 0.0042    | 0.14 ± 0.035                         | 0.18 ± 0.10      | 0.14 ± 0.041       | 0.087 ± 0.0049   |
| Nitrite (NO <sub>2</sub> <sup>-</sup> )                                                                              | 0.15 ± 0.25                                                    | 0.0015 ± 0.0019 | 0.00 ± 0.00040      | 0.0014 ± 0.00094 | 0.053 ± 0.071                        | 0.011 ± 0.015    | 0.00044 ± 0.00062  | 0.0012 ± 0.00037 |
| Nitrate (NO <sub>3</sub> <sup>-</sup> )                                                                              | 0.20 ± 0.16                                                    | 1.45 ± 0.79     | 0.17 ± 0.053        | 8.19 ± 5.96      | 0.16 ± 0.12                          | 0.87 ± 0.15      | 0.040 ± 0.00070    | 1.10 ± 0.18      |
| Sulfate (SO <sub>4</sub> <sup>-</sup> )                                                                              | 0.46 ± 0.38                                                    | 0.35 ± 0.16     | 0.26 ± 0.24         | 0.64 ± 0.23      | 0.89 ± 0.97                          | 1.60 ± 1.33      | 0.22 ± 0.013       | 1.29 ± 0.13      |
| Ammonium (NH <sub>4</sub> <sup>+</sup> )                                                                             | 0.11 ± 0.19                                                    | 0.66 ± 0.78     | 0.0028 ± 0.00085    | 4.30 ± 0.098     | 0.00070 ± 0.00099                    | 0.052 ± 0.074    | 0.00046 ± 0.000031 | 1.0080 ± 0.048   |
| OC1 (140°C)                                                                                                          | 14.58 ± 4.92                                                   | 10.33 ± 4.49    | 9.28 ± 4.049        | 3.76 ± 1.77      | 9.54 ± 2.50                          | 7.48 ± 3.12      | 13.15 ± 3.56       | 10.087 ± 1.63    |
| OC2 (280°C)                                                                                                          | 21.37 ± 0.70                                                   | 17.98 ± 1.13    | 17.28 ± 3.42        | 9.68 ± 3.57      | 21.66 ± 2.045                        | 19.50 ± 0.85     | 20.74 ± 2.34       | 19.76 ± 2.57     |
| OC3 (480°C)                                                                                                          | 26.36 ± 5.88                                                   | 24.57 ± 6.14    | 28.99 ± 14.35       | 18.47 ± 5.013    | 25.30 ± 7.61                         | 24.97 ± 0.95     | 20.38 ± 0.63       | 21.97 ± 1.65     |
| OC4 (580°C)                                                                                                          | 7.70 ± 1.79                                                    | 6.51 ± 1.99     | 8.0014 ± 4.44       | 8.56 ± 2.51      | 7.60 ± 4.045                         | 7.76 ± 1.017     | 4.29 ± 0.0044      | 5.34 ± 2.10      |
| Pyrolyzed Carbon (OP)                                                                                                | 7.40 ± 1.69                                                    | 10.66 ± 4.45    | 7.35 ± 2.14         | 6.68 ± 3.39      | 7.61 ± 1.80                          | 10.45 ± 1.14     | 8.81 ± 0.79        | 10.73 ± 0.53     |
| Organic Carbon (OC) <sup>g</sup>                                                                                     | 77.41 ± 6.13                                                   | 70.047 ± 8.98   | 70.91 ± 20.30       | 47.16 ± 11.23    | 71.71 ± 9.40                         | 70.16 ± 5.033    | 67.37 ± 4.48       | 67.88 ± 5.22     |
| EC1 (580°C)                                                                                                          | 6.050 ± 1.50                                                   | 9.94 ± 2.92     | 5.24 ± 1.038        | 7.11 ± 3.90      | 7.61 ± 2.43                          | 9.58 ± 1.36      | 6.44 ± 0.099       | 8.98 ± 1.36      |
| EC2 (740°C)                                                                                                          | 3.43 ± 3.013                                                   | 2.93 ± 2.14     | 5.70 ± 1.85         | 1.63 ± 1.99      | 3.51 ± 2.51                          | 2.94 ± 2.34      | 4.057 ± 0.60       | 3.28 ± 0.88      |
| EC3 (840°C)                                                                                                          | 0.00 ± 0.00020                                                 | 0.00 ± 0.00021  | 0.00 ± 0.00029      | 0.00 ± 0.00022   | 0.00 ± 0.00014                       | 0.00 ± 0.00015   | 0.00 ± 0.00011     | 0.00 ± 0.00010   |
| Elemental Carbon (EC) <sup>g</sup>                                                                                   | 2.082 ± 1.079                                                  | 2.21 ± 0.99     | 3.59 ± 0.75         | 2.047 ± 2.51     | 3.51 ± 1.72                          | 2.076 ± 0.16     | 1.69 ± 0.29        | 1.53 ± 0.057     |
| Total Carbon (TC)                                                                                                    | 79.49 ± 7.072                                                  | 72.26 ± 8.88    | 74.50 ± 21.052      | 49.20 ± 13.74    | 75.23 ± 11.12                        | 72.24 ± 4.88     | 69.06 ± 4.77       | 69.41 ± 5.16     |
| Water-Soluble OC (WSOC)                                                                                              | 29.32 ± 9.03                                                   | 28.35 ± 3.81    | 31.58 ± 11.22       | 25.77 ± 4.05     | 19.53 ± 4.67                         | 22.71 ± 4.43     | 16.33 ± 1.17       | 23.15 ± 1.45     |
| Formic acid (CH <sub>2</sub> O <sub>2</sub> )                                                                        | 0.093 ± 0.029                                                  | 0.21 ± 0.049    | 0.069 ± 0.018       | 0.25 ± 0.11      | 0.11 ± 0.097                         | 0.20 ± 0.13      | 0.022 ± 0.0044     | 0.15 ± 0.0065    |
| Acetic acid (C <sub>2</sub> H <sub>4</sub> O <sub>2</sub> )                                                          | 0.38 ± 0.15                                                    | 0.64 ± 0.17     | 0.45 ± 0.24         | 0.34 ± 0.26      | 0.19 ± 0.15                          | 0.047 ± 0.011    | 0.056 ± 0.010      | 0.26 ± 0.024     |
| Oxalic acid (C <sub>2</sub> H <sub>2</sub> O <sub>4</sub> )                                                          | 0.039 ± 0.028                                                  | 0.86 ± 0.16     | 0.043 ± 0.061       | 3.26 ± 0.52      | 0.050 ± 0.070                        | 0.58 ± 0.26      | 0.00 ± 0.02        | 1.12 ± 0.19      |
| Propionic acid (C <sub>3</sub> H <sub>5</sub> O <sub>2</sub> )                                                       | 0.0072 ± 0.010                                                 | 0.024 ± 0.034   | 0.00 ± 0.00020      | 0.034 ± 0.048    | 0.00 ± 0.000099                      | 0.00 ± 0.00010   | 0.00 ± 0.000077    | 0.00 ± 0.000071  |
| Levoglucosan (C <sub>6</sub> H <sub>10</sub> O <sub>5</sub> )                                                        | 17.87 ± 8.03                                                   | 16.99 ± 3.32    | 9.78 ± 1.15         | 4.87 ± 2.89      | 3.15 ± 0.0092                        | 2.78 ± 0.041     | 3.12 ± 0.24        | 1.49 ± 0.50      |
| Mannosan (C <sub>6</sub> H <sub>10</sub> O <sub>5</sub> )                                                            | 3.46 ± 1.25                                                    | 3.53 ± 1.26     | 2.73 ± 0.40         | 0.95 ± 0.34      | 0.00 ± 0.00022                       | 0.00 ± 0.00023   | 0.00 ± 0.00017     | 0.00 ± 0.00016   |
| Galactose/Maltitol (C <sub>6</sub> H <sub>12</sub> O <sub>6</sub> /C <sub>12</sub> H <sub>24</sub> O <sub>11</sub> ) | 0.00 ± 0.00015                                                 | 0.00 ± 0.00016  | 0.00 ± 0.00022      | 0.00 ± 0.00017   | 0.00 ± 0.00011                       | 0.00 ± 0.00012   | 0.00 ± 0.00087     | 0.00 ± 0.000079  |
| Glycerol (C <sub>3</sub> H <sub>8</sub> O <sub>3</sub> )                                                             | 0.23 ± 0.33                                                    | 0.20 ± 0.28     | 0.98 ± 1.39         | 0.12 ± 0.17      | 0.00 ± 0.0000050                     | 0.00 ± 0.0000021 | 0.00 ± 0.0000015   | 0.00 ± 0.0000014 |
| Mannitol (C <sub>6</sub> H <sub>14</sub> O <sub>6</sub> )                                                            | 0.00 ± 0.000055                                                | 0.10 ± 0.15     | 0.00 ± 0.000080     | 0.00 ± 0.000061  | 0.00 ± 0.000039                      | 0.00 ± 0.000042  | 0.00 ± 0.000056    | 0.00 ± 0.000028  |
| Aluminum (Al)                                                                                                        | 0.026 ± 0.24                                                   | 0.063 ± 0.28    | 0.029 ± 0.13        | 0.0098 ± 0.0046  | 0.026 ± 0.059                        | 0.069 ± 0.97     | 0.12 ± 1.34        | 0.080 ± 0.61     |
| Silicon (Si)                                                                                                         | 0.0077 ± 0.12                                                  | 0.0069 ± 0.098  | 0.0012 ± 0.017      | 0.63 ± 0.00060   | 0.00 ± 0.00030                       | 0.021 ± 0.22     | 0.00 ± 0.0021      | 0.021 ± 0.067    |
| Phosphorous (P)                                                                                                      | 0.00 ± 0.000084                                                | 0.00 ± 0.00011  | 0.00 ± 0.00012      | 0.00 ± 0.00011   | 0.00 ± 0.000060                      | 0.00 ± 0.000064  | 0.00 ± 0.000048    | 0.00 ± 0.000044  |

820 Table 1 (cont'd)

| Aging Time                           | Average ± Standard Deviation of Percent PM <sub>2.5</sub> Mass |                   |                     |                    |                                      |                   |                     |                   |
|--------------------------------------|----------------------------------------------------------------|-------------------|---------------------|--------------------|--------------------------------------|-------------------|---------------------|-------------------|
|                                      | Temperate                                                      |                   |                     |                    | Subtropical                          |                   |                     |                   |
|                                      | Northern Alaska, USA                                           |                   |                     |                    | Putnam County Lakebed, Florida (FL1) |                   |                     |                   |
|                                      | 2 days                                                         |                   | 7 days              |                    | 2 (25%) days                         |                   | 7 (25%) days        |                   |
| Fresh 2                              | Aged 2                                                         | Fresh 7           | Aged 7 <sup>b</sup> | Fresh 2            | Aged 2                               | Fresh 7           | Aged 7              |                   |
| Peat IDs in the average <sup>c</sup> | PEAT013, PEAT014, PEAT019                                      |                   | PEAT020, PEAT022    |                    | PEAT008, PEAT009                     |                   | PEAT005, PEAT006    |                   |
| Sulfur (S)                           | 0.031 ± 0.054                                                  | 0.062 ± 0.087     | 0.0099 ± 0.014      | 0.34 ± 0.00013     | 0.19 ± 0.056                         | 0.37 ± 0.24       | 0.17 ± 0.037        | 0.74 ± 0.047      |
| Chlorine (Cl)                        | 0.12 ± 0.068                                                   | 0.087 ± 0.030     | 0.14 ± 0.049        | 0.019 ± 0.000040   | 0.12 ± 0.0064                        | 0.067 ± 0.024     | 0.14 ± 0.022        | 0.056 ± 0.00047   |
| Potassium (K)                        | 0.046 ± 0.016                                                  | 0.16 ± 0.15       | 0.052 ± 0.046       | 0.47 ± 0.00022     | 0.0092 ± 0.012                       | 0.057 ± 0.035     | 0.0046 ± 0.00044    | 0.12 ± 0.10       |
| Calcium (Ca)                         | 0.032 ± 0.032                                                  | 0.032 ± 0.045     | 0.035 ± 0.049       | 0.00 ± 0.00057     | 0.0040 ± 0.0056                      | 0.00 ± 0.00034    | 0.00 ± 0.00025      | 0.00 ± 0.00023    |
| Scandium (Sc)                        | 0.00 ± 0.0020                                                  | 0.00 ± 0.0025     | 0.00 ± 0.0029       | 0.00 ± 0.0026      | 0.00 ± 0.0014                        | 0.00 ± 0.0015     | 0.022 ± 0.031       | 0.00 ± 0.0010     |
| Titanium (Ti)                        | 0.00 ± 0.000071                                                | 0.00 ± 0.000091   | 0.0055 ± 0.0078     | 0.051 ± 0.000093   | 0.0036 ± 0.0050                      | 0.00 ± 0.000054   | 0.0086 ± 0.012      | 0.00 ± 0.000037   |
| Vanadium (V)                         | 0.00 ± 0.000013                                                | 0.00 ± 0.000017   | 0.00 ± 0.000019     | 0.00 ± 0.000017    | 0.00 ± 0.000094                      | 0.00 ± 0.000010   | 0.00 ± 0.0000075    | 0.00 ± 0.0000069  |
| Chromium (Cr)                        | 0.00051 ± 0.00089                                              | 0.00028 ± 0.00040 | 0.00 ± 0.000065     | 0.00 ± 0.000057    | 0.00 ± 0.000032                      | 0.00 ± 0.000034   | 0.00034 ± 0.00048   | 0.00 ± 0.000023   |
| Manganese (Mn)                       | 0.0015 ± 0.0014                                                | 0.00069 ± 0.00098 | 0.0016 ± 0.0023     | 0.0011 ± 0.00020   | 0.0013 ± 0.0012                      | 0.00033 ± 0.00047 | 0.00057 ± 0.00080   | 0.0016 ± 0.0018   |
| Iron (Fe)                            | 0.036 ± 0.014                                                  | 0.10 ± 0.095      | 0.049 ± 0.048       | 0.029 ± 0.00035    | 0.00 ± 0.00019                       | 0.047 ± 0.040     | 0.024 ± 0.012       | 0.065 ± 0.0091    |
| Cobalt (Co)                          | 0.00 ± 0.0000088                                               | 0.00 ± 0.000011   | 0.00 ± 0.000013     | 0.00013 ± 0.000011 | 0.00 ± 0.000063                      | 0.00021 ± 0.00030 | 0.00020 ± 0.00028   | 0.00 ± 0.0000046  |
| Nickel (Ni)                          | 0.00028 ± 0.00049                                              | 0.00 ± 0.000028   | 0.00075 ± 0.0011    | 0.00 ± 0.000028    | 0.00045 ± 0.00064                    | 0.00 ± 0.000017   | 0.00069 ± 0.00097   | 0.00043 ± 0.00026 |
| Copper (Cu)                          | 0.028 ± 0.047                                                  | 0.027 ± 0.034     | 0.0098 ± 0.0028     | 0.15 ± 0.00018     | 0.00 ± 0.000098                      | 0.0035 ± 0.0049   | 0.0019 ± 0.000053   | 0.069 ± 0.090     |
| Zinc (Zn)                            | 0.026 ± 0.036                                                  | 0.027 ± 0.031     | 0.0026 ± 0.0020     | 0.011 ± 0.000097   | 0.0013 ± 0.0015                      | 0.0023 ± 0.0032   | 0.00041 ± 0.00028   | 0.0046 ± 0.00037  |
| Arsenic (As)                         | 0.0006 ± 0.00078                                               | 0.00 ± 0.000045   | 0.00 ± 0.000052     | 0.00067 ± 0.000045 | 0.00 ± 0.000025                      | 0.00 ± 0.000027   | 0.000062 ± 0.000087 | 0.00034 ± 0.00048 |
| Selenium (Se)                        | 0.00016 ± 0.00028                                              | 0.0064 ± 0.0017   | 0.0022 ± 0.0032     | 0.00 ± 0.000080    | 0.0017 ± 0.00092                     | 0.00 ± 0.000047   | 0.00034 ± 0.00048   | 0.0034 ± 0.0017   |
| Bromine (Br)                         | 0.0017 ± 0.0018                                                | 0.0031 ± 0.0044   | 0.0079 ± 0.00064    | 0.0020 ± 0.000023  | 0.020 ± 0.00098                      | 0.0077 ± 0.010    | 0.024 ± 0.0043      | 0.019 ± 0.0012    |
| Rubidium (Rb)                        | 0.00 ± 0.000022                                                | 0.0035 ± 0.0048   | 0.0057 ± 0.0059     | 0.0026 ± 0.000028  | 0.00011 ± 0.00016                    | 0.00095 ± 0.0013  | 0.00 ± 0.000013     | 0.00066 ± 0.00047 |
| Strontium (Sr)                       | 0.0017 ± 0.00036                                               | 0.0076 ± 0.0084   | 0.0068 ± 0.0014     | 0.0028 ± 0.000028  | 0.0023 ± 0.00057                     | 0.0038 ± 0.0013   | 0.0018 ± 0.00075    | 0.0046 ± 0.0025   |
| Yttrium (Y)                          | 0.0013 ± 0.0014                                                | 0.0037 ± 0.0013   | 0.0057 ± 0.0041     | 0.0054 ± 0.000028  | 0.0014 ± 0.00029                     | 0.0012 ± 0.0018   | 0.00085 ± 0.000067  | 0.0022 ± 0.0032   |
| Zirconium (Zr)                       | 0.0027 ± 0.0028                                                | 0.0047 ± 0.0014   | 0.0025 ± 0.0027     | 0.011 ± 0.00011    | 0.0016 ± 0.0023                      | 0.0003 ± 0.00089  | 0.00074 ± 0.0010    | 0.0013 ± 0.00079  |
| Niobium (Nb)                         | 0.00 ± 0.000040                                                | 0.00092 ± 0.00090 | 0.00027 ± 0.00039   | 0.00 ± 0.000051    | 0.0016 ± 0.0023                      | 0.00082 ± 0.0012  | 0.00042 ± 0.00060   | 0.00 ± 0.000021   |
| Molybdenum (Mo)                      | 0.0012 ± 0.0019                                                | 0.0044 ± 0.0062   | 0.0020 ± 0.00084    | 0.00 ± 0.00011     | 0.00 ± 0.000060                      | 0.00063 ± 0.00089 | 0.0025 ± 0.00092    | 0.00 ± 0.000044   |
| Silver (Ag)                          | 0.00 ± 0.00011                                                 | 0.00 ± 0.00014    | 0.00 ± 0.00016      | 0.00 ± 0.00014     | 0.0010 ± 0.0014                      | 0.00 ± 0.000081   | 0.00 ± 0.000060     | 0.00 ± 0.000055   |
| Cadmium (Cd)                         | 0.00 ± 0.00015                                                 | 0.00 ± 0.00019    | 0.00 ± 0.00022      | 0.00 ± 0.00019     | 0.0034 ± 0.0049                      | 0.00 ± 0.00011    | 0.0029 ± 0.00093    | 0.0020 ± 0.0029   |
| Indium (In)                          | 0.00082 ± 0.0013                                               | 0.0011 ± 0.0016   | 0.00069 ± 0.00097   | 0.00 ± 0.00013     | 0.00068 ± 0.00096                    | 0.0025 ± 0.0036   | 0.0021 ± 0.0030     | 0.0018 ± 0.0026   |
| Tin (Sn)                             | 0.0045 ± 0.0078                                                | 0.014 ± 0.020     | 0.0067 ± 0.0025     | 0.00 ± 0.00024     | 0.0037 ± 0.00047                     | 0.0034 ± 0.0048   | 0.0028 ± 0.0025     | 0.0074 ± 0.00049  |
| Antimony (Sb)                        | 0.0065 ± 0.011                                                 | 0.015 ± 0.021     | 0.00 ± 0.00041      | 0.00 ± 0.00036     | 0.00 ± 0.00020                       | 0.0072 ± 0.010    | 0.0020 ± 0.0029     | 0.00 ± 0.00015    |
| Cesium (Cs)                          | 0.0097 ± 0.0095                                                | 0.022 ± 0.031     | 0.010 ± 0.014       | 0.058 ± 0.0010     | 0.00 ± 0.00056                       | 0.00 ± 0.00060    | 0.00 ± 0.00044      | 0.00 ± 0.00041    |
| Barium (Ba)                          | 0.00 ± 0.00059                                                 | 0.00 ± 0.00077    | 0.00 ± 0.00086      | 0.00 ± 0.00089     | 0.00 ± 0.00042                       | 0.00 ± 0.00046    | 0.00 ± 0.00034      | 0.00 ± 0.00031    |
| Lanthanum (La)                       | 0.015 ± 0.026                                                  | 0.065 ± 0.025     | 0.055 ± 0.0026      | 0.00 ± 0.0015      | 0.042 ± 0.044                        | 0.0053 ± 0.0075   | 0.019 ± 0.028       | 0.036 ± 0.021     |
| Wolfram (W)                          | 0.0034 ± 0.0059                                                | 0.0082 ± 0.0061   | 0.00 ± 0.00033      | 0.00 ± 0.00029     | 0.0037 ± 0.0018                      | 0.0034 ± 0.0049   | 0.0019 ± 0.0028     | 0.00 ± 0.00012    |
| Gold (Au)                            | 0.00 ± 0.000066                                                | 0.0032 ± 0.0045   | 0.00 ± 0.000098     | 0.00 ± 0.000085    | 0.00062 ± 0.00088                    | 0.00 ± 0.000051   | 0.00022 ± 0.00031   | 0.0012 ± 0.0017   |
| Mercury (Hg)                         | 0.00034 ± 0.00059                                              | 0.0014 ± 0.0020   | 0.00 ± 0.000052     | 0.00 ± 0.000045    | 0.00020 ± 0.00028                    | 0.0014 ± 0.0020   | 0.00 ± 0.000020     | 0.00024 ± 0.00033 |
| Lead (Pb)                            | 0.00 ± 0.000066                                                | 0.0010 ± 0.0015   | 0.00 ± 0.000098     | 0.0036 ± 0.000085  | 0.0015 ± 0.0021                      | 0.0014 ± 0.000962 | 0.00076 ± 0.0011    | 0.0012 ± 0.0017   |
| Uranium (U)                          | 0.0050 ± 0.0044                                                | 0.0028 ± 0.0027   | 0.0011 ± 0.0015     | 0.0035 ± 0.00015   | 0.0034 ± 0.0044                      | 0.00 ± 0.000092   | 0.0026 ± 0.0037     | 0.00 ± 0.000062   |

821 Table 1 (cont'd)

| Aging Time                                                                                                              | Average ± Standard Deviation of Percent PM <sub>2.5</sub> Mass |                  |                           |                           |                  |                  |                  |                  |
|-------------------------------------------------------------------------------------------------------------------------|----------------------------------------------------------------|------------------|---------------------------|---------------------------|------------------|------------------|------------------|------------------|
|                                                                                                                         | Subtropical                                                    |                  |                           |                           | Tropical         |                  |                  |                  |
|                                                                                                                         | Everglades National Park, Florida (FL2)                        |                  |                           |                           | Borneo, Malaysia |                  |                  |                  |
|                                                                                                                         | 2 days                                                         |                  | 7 days                    |                           | 2 days           |                  | 7 days           |                  |
| Fresh 2                                                                                                                 | Aged 2                                                         | Fresh 7          | Aged 7                    | Fresh 2                   | Aged 2           | Fresh 7          | Aged 7           |                  |
| Peat IDs in the average <sup>c</sup>                                                                                    | PEAT010, PEAT011, PEAT012, PEAT015                             |                  | PEAT016, PEAT017, PEAT018 |                           | PEAT036, PEAT038 |                  | PEAT039, PEAT041 |                  |
| Nitric Acid (HNO <sub>3</sub> )                                                                                         | 0.38 ± 0.13                                                    | 0.47 ± 0.37      | 0.28 ± 0.042              | 0.25 ± 0.13               | 0.20 ± 0.0080    | 0.26 ± 0.040     | 0.23 ± 0.18      | 0.17 ± 0.026     |
| Ammonia (NH <sub>3</sub> )                                                                                              | 51.12 ± 27.44                                                  | 14.37 ± 5.54     | 63.89 ± 25.088            | 4.79 ± 0.60               | 20.34 ± 0.0030   | 9.67 ± 2.25      | 25.50 ± 1.98     | 4.88 ± 1.76      |
| Water-Soluble Sodium (Na <sup>+</sup> )                                                                                 | 0.047 ± 0.018                                                  | 0.056 ± 0.016    | 0.030 ± 0.017             | 0.022 ± 0.0063            | 0.017 ± 0.0090   | 0.033 ± 0.023    | 0.018 ± 0.011    | 0.032 ± 0.017    |
| Water-Soluble Potassium (K <sup>+</sup> )                                                                               | 1.11 ± 2.15                                                    | na <sup>d</sup>  | 0.025 ± 0.017             | na <sup>d</sup>           | 0.031 ± 0.028    | na <sup>d</sup>  | 0.048 ± 0.035    | na <sup>d</sup>  |
| Chloride (Cl <sup>-</sup> )                                                                                             | 0.26 ± 0.072                                                   | 0.21 ± 0.12      | 0.22 ± 0.018              | 0.086 ± 0.024             | 0.11 ± 0.024     | 0.10 ± 0.026     | 0.16 ± 0.073     | 0.10 ± 0.00025   |
| Nitrite (NO <sub>2</sub> <sup>-</sup> )                                                                                 | 0.058 ± 0.098                                                  | 0.0020 ± 0.0031  | 0.00085 ± 0.0015          | 0.0023 ± 0.00072          | 0.00 ± 0.00025   | 0.00098 ± 0.0014 | 0.00 ± 0.00030   | 0.015 ± 0.019    |
| Nitrate (NO <sub>3</sub> <sup>-</sup> )                                                                                 | 0.27 ± 0.26                                                    | 2.64 ± 0.76      | 0.14 ± 0.097              | 7.76 ± 1.029              | 0.087 ± 0.046    | 0.91 ± 0.22      | 0.13 ± 0.12      | 4.69 ± 1.34      |
| Sulfate (SO <sub>4</sub> <sup>2-</sup> )                                                                                | 1.40 ± 1.89                                                    | 1.33 ± 0.69      | 0.34 ± 0.022              | 1.99 ± 0.28               | 0.17 ± 0.024     | 0.56 ± 0.18      | 0.13 ± 0.062     | 1.96 ± 0.071     |
| Ammonium (NH <sub>4</sub> <sup>+</sup> )                                                                                | 0.0013 ± 0.0015                                                | 0.37 ± 0.60      | 0.0036 ± 0.00092          | 4.55 ± 0.57               | 0.0017 ± 0.0011  | 0.83 ± 0.086     | 0.0027 ± 0.00048 | 4.74 ± 0.77      |
| OC1 (140°C)                                                                                                             | 11.40 ± 1.25                                                   | 7.017 ± 3.95     | 18.049 ± 2.22             | 4.012 ± 0.89              | 16.033 ± 2.088   | 6.37 ± 3.36      | 15.20 ± 1.21     | 5.83 ± 3.45      |
| OC2 (280°C)                                                                                                             | 23.86 ± 6.033                                                  | 16.25 ± 3.60     | 24.53 ± 3.41              | 12.12 ± 0.86              | 22.44 ± 1.91     | 18.78 ± 4.51     | 23.41 ± 0.25     | 12.14 ± 2.71     |
| OC3 (480°C)                                                                                                             | 23.70 ± 7.73                                                   | 21.13 ± 3.73     | 23.33 ± 2.32              | 17.83 ± 3.95              | 25.52 ± 2.55     | 28.64 ± 4.52     | 26.24 ± 1.16     | 20.82 ± 3.30     |
| OC4 (580°C)                                                                                                             | 9.010 ± 3.51                                                   | 8.53 ± 2.94      | 6.15 ± 0.95               | 5.65 ± 1.23               | 4.37 ± 0.18      | 8.32 ± 1.099     | 5.56 ± 1.40      | 5.59 ± 0.82      |
| Pyrolyzed Carbon (OP)                                                                                                   | 10.73 ± 2.31                                                   | 9.89 ± 3.86      | 13.036 ± 1.020            | 12.30 ± 1.22              | 10.74 ± 0.66     | 12.56 ± 4.73     | 10.35 ± 0.11     | 13.15 ± 2.69     |
| Organic Carbon (OC) <sup>e</sup>                                                                                        | 78.69 ± 18.69                                                  | 62.82 ± 14.029   | 85.086 ± 5.65             | 51.90 ± 3.86              | 79.10 ± 3.21     | 74.66 ± 18.22    | 80.76 ± 0.99     | 57.53 ± 11.32    |
| EC1 (580°C)                                                                                                             | 8.59 ± 4.065                                                   | 8.56 ± 2.77      | 7.53 ± 1.22               | 11.035 ± 1.98             | 6.43 ± 0.48      | 8.57 ± 3.59      | 6.85 ± 0.21      | 9.13 ± 0.94      |
| EC2 (740°C)                                                                                                             | 6.54 ± 2.76                                                    | 3.42 ± 3.41      | 7.59 ± 1.66               | 3.35 ± 2.14               | 5.12 ± 0.25      | 6.18 ± 1.64      | 5.14 ± 0.16      | 4.69 ± 0.81      |
| EC3 (840°C)                                                                                                             | 0.00 ± 0.00029                                                 | 0.00 ± 0.00026   | 0.00 ± 0.00027            | 0.00 ± 0.00016            | 0.00 ± 0.00017   | 0.00 ± 0.00020   | 0.00 ± 0.00020   | 0.00 ± 0.00018   |
| Elemental Carbon (EC) <sup>e</sup>                                                                                      | 4.40 ± 1.51                                                    | 2.084 ± 0.52     | 2.084 ± 1.81              | 2.092 ± 1.11              | 0.82 ± 0.074     | 2.19 ± 0.50      | 1.63 ± 0.16      | 0.67 ± 0.94      |
| Total Carbon (TC)                                                                                                       | 83.090 ± 19.45                                                 | 64.90 ± 14.48    | 87.17 ± 7.38              | 54.00 ± 4.57              | 79.92 ± 3.29     | 76.86 ± 18.72    | 82.39 ± 1.14     | 58.20 ± 10.38    |
| Water-Soluble OC (WSOC)                                                                                                 | 31.71 ± 8.36                                                   | 28.89 ± 4.08     | 34.33 ± 4.82              | 23.28 ± 2.80              | 14.62 ± 0.92     | 22.88 ± 2.33     | 17.15 ± 2.80     | 22.90 ± 0.76     |
| Formic acid (CH <sub>2</sub> O <sub>2</sub> )                                                                           | 0.14 ± 0.17                                                    | 0.30 ± 0.052     | 0.054 ± 0.020             | 0.42 ± 0.23               | 0.10 ± 0.014     | 0.26 ± 0.049     | 0.13 ± 0.019     | 0.42 ± 0.10      |
| Acetic acid (C <sub>2</sub> H <sub>4</sub> O <sub>2</sub> )                                                             | 0.33 ± 0.25                                                    | 0.38 ± 0.063     | 0.22 ± 0.12               | 0.35 ± 0.13               | 0.29 ± 0.0081    | 0.59 ± 0.24      | 0.58 ± 0.075     | 0.56 ± 0.018     |
| Oxalic acid (C <sub>2</sub> H <sub>2</sub> O <sub>4</sub> )                                                             | 0.11 ± 0.058                                                   | 0.94 ± 0.22      | 0.082 ± 0.029             | 3.14 ± 0.56               | 0.26 ± 0.12      | 1.14 ± 0.21      | 0.43 ± 0.22      | 3.36 ± 0.28      |
| Propionic acid (C <sub>3</sub> H <sub>5</sub> O <sub>2</sub> )                                                          | 0.0064 ± 0.013                                                 | 0.00 ± 0.00018   | 0.018 ± 0.031             | 0.012 ± 0.020             | 0.045 ± 0.019    | 0.0095 ± 0.013   | 0.012 ± 0.017    | 0.066 ± 0.094    |
| Levogluconan (C <sub>6</sub> H <sub>10</sub> O <sub>5</sub> )                                                           | 1.08 ± 1.34                                                    | 0.86 ± 1.073     | 2.22 ± 0.66               | 0.62 ± 0.81               | 2.52 ± 0.016     | 2.28 ± 0.99      | 4.38 ± 0.50      | 2.53 ± 0.19      |
| Mannosan (C <sub>6</sub> H <sub>10</sub> O <sub>5</sub> )                                                               | 0.00 ± 0.00045                                                 | 0.00 ± 0.00039   | 0.056 ± 0.097             | 0.24 ± 0.42               | 0.00 ± 0.00027   | 0.00 ± 0.00030   | 0.19 ± 0.26      | 0.082 ± 0.12     |
| Galactose/Maltitol<br>(C <sub>6</sub> H <sub>12</sub> O <sub>6</sub> /C <sub>12</sub> H <sub>24</sub> O <sub>11</sub> ) | 0.00 ± 0.00023                                                 | 0.00 ± 0.00020   | 0.00 ± 0.00021            | 0.00 ± 0.00012            | 0.00 ± 0.00014   | 0.13 ± 0.18      | 0.00 ± 0.00017   | 0.00 ± 0.00014   |
| Glycerol (C <sub>3</sub> H <sub>8</sub> O <sub>3</sub> )                                                                | 0.00 ± 0.0000041                                               | 0.00 ± 0.0000036 | 0.00 ± 0.0000038          | 0.00 ± 0.0000022          | 0.00 ± 0.0000025 | 0.00 ± 0.0000028 | 0.00 ± 0.0000030 | 0.00 ± 0.0000024 |
| Mannitol (C <sub>6</sub> H <sub>14</sub> O <sub>6</sub> )                                                               | 0.00 ± 0.000083                                                | 0.00 ± 0.000072  | 0.00 ± 0.000075           | 0.00 ± 0.000043           | 0.011 ± 0.016    | 0.00 ± 0.000055  | 0.00 ± 0.000060  | 0.00 ± 0.000049  |
| Aluminum (Al)                                                                                                           | 0.043 ± 0.86                                                   | 0.070 ± 1.20     | 0.00024 ± 0.0041          | 0.00 ± 0.026 <sup>c</sup> | 0.033 ± 0.47     | 0.085 ± 0.030    | 0.045 ± 0.64     | 0.15 ± 0.030     |
| Silicon (Si)                                                                                                            | 0.027 ± 0.52                                                   | 0.26 ± 3.92      | 0.00 ± 0.00059            | 0.46 ± 0.31               | 0.012 ± 0.17     | 0.082 ± 0.0036   | 0.00 ± 0.00043   | 0.69 ± 0.0043    |
| Phosphorous (P)                                                                                                         | 0.00 ± 0.00013                                                 | 0.00 ± 0.00011   | 0.00 ± 0.00012            | 0.00 ± 0.000061           | 0.00 ± 0.000072  | 0.00 ± 0.000071  | 0.00 ± 0.000086  | 0.00 ± 0.000071  |

823  
824

Table 1 (cont'd)

| Aging Time                           | Average ± Standard Deviation of Percent PM <sub>2.5</sub> Mass |                     |                           |                   |                   |                    |                   |                     |
|--------------------------------------|----------------------------------------------------------------|---------------------|---------------------------|-------------------|-------------------|--------------------|-------------------|---------------------|
|                                      | Subtropical                                                    |                     |                           |                   | Tropical          |                    |                   |                     |
|                                      | Everglades National Park, Florida (FL2)                        |                     |                           |                   | Borneo, Malaysia  |                    |                   |                     |
|                                      | 2 days                                                         |                     | 7 days                    |                   | 2 days            |                    | 7 days            |                     |
|                                      | Fresh 2                                                        | Aged 2              | Fresh 7                   | Aged 7            | Fresh 2           | Aged 2             | Fresh 7           | Aged 7              |
| Peat IDs in the average <sup>a</sup> | PEAT010, PEAT011, PEAT012, PEAT015                             |                     | PEAT016, PEAT017, PEAT018 |                   | PEAT036, PEAT038  |                    | PEAT039, PEAT041  |                     |
| Sulfur (S)                           | 0.39 ± 0.23                                                    | 0.59 ± 0.27         | 0.42 ± 0.066              | 1.12 ± 0.094      | 0.11 ± 0.12       | 0.39 ± 0.00013     | 0.029 ± 0.0022    | 0.83 ± 0.00026      |
| Chlorine (Cl)                        | 0.21 ± 0.088                                                   | 0.065 ± 0.029       | 0.24 ± 0.024              | 0.038 ± 0.011     | 0.074 ± 0.0012    | 0.067 ± 0.000035   | 0.085 ± 0.0038    | 0.047 ± 0.000030    |
| Potassium (K)                        | 0.034 ± 0.015                                                  | 0.51 ± 0.37         | 0.018 ± 0.014             | 0.22 ± 0.052      | 0.051 ± 0.049     | 0.084 ± 0.00010    | 0.028 ± 0.017     | 0.017 ± 0.00010     |
| Calcium (Ca)                         | 0.00 ± 0.00067                                                 | 0.0081 ± 0.016      | 0.00 ± 0.00061            | 0.010 ± 0.014     | 0.0058 ± 0.0082   | 0.00 ± 0.00037     | 0.00 ± 0.00046    | 0.023 ± 0.00038     |
| Scandium (Sc)                        | 0.00 ± 0.0030                                                  | 0.00 ± 0.0026       | 0.00 ± 0.0027             | 0.00 ± 0.0014     | 0.00 ± 0.0017     | 0.00 ± 0.0017      | 0.00 ± 0.0020     | 0.00 ± 0.0017       |
| Titanium (Ti)                        | 0.0061 ± 0.0079                                                | 0.017 ± 0.035       | 0.00 ± 0.000098           | 0.00 ± 0.000051   | 0.0073 ± 0.010    | 0.00 ± 0.000059    | 0.0066 ± 0.0094   | 0.00 ± 0.000059     |
| Vanadium (V)                         | 0.0010 ± 0.0020                                                | 0.00 ± 0.000017     | 0.00 ± 0.000018           | 0.0065 ± 0.0092   | 0.00 ± 0.000011   | 0.00 ± 0.000011    | 0.00 ± 0.000014   | 0.00 ± 0.000011     |
| Chromium (Cr)                        | 0.00 ± 0.000066                                                | 0.00056 ± 0.0011    | 0.00 ± 0.000061           | 0.00016 ± 0.00023 | 0.00 ± 0.000038   | 0.00 ± 0.000037    | 0.0026 ± 0.0037   | 0.00 ± 0.000037     |
| Manganese (Mn)                       | 0.0032 ± 0.0064                                                | 0.0051 ± 0.0050     | 0.0017 ± 0.0015           | 0.0034 ± 0.0043   | 0.0055 ± 0.0026   | 0.0075 ± 0.00013   | 0.0088 ± 0.00010  | 0.0046 ± 0.00013    |
| Iron (Fe)                            | 0.023 ± 0.021                                                  | 0.065 ± 0.034       | 0.020 ± 0.016             | 0.091 ± 0.096     | 0.074 ± 0.0078    | 0.074 ± 0.00023    | 0.045 ± 0.020     | 0.043 ± 0.00023     |
| Cobalt (Co)                          | 0.000055 ± 0.00011                                             | 0.000045 ± 0.000090 | 0.00024 ± 0.00041         | 0.00 ± 0.0000064  | 0.00 ± 0.0000075  | 0.00061 ± 0.000074 | 0.00 ± 0.0000090  | 0.000087 ± 0.000074 |
| Nickel (Ni)                          | 0.00026 ± 0.00042                                              | 0.00 ± 0.000029     | 0.00 ± 0.000031           | 0.00038 ± 0.00054 | 0.00064 ± 0.00091 | 0.00 ± 0.000019    | 0.0034 ± 0.0014   | 0.00 ± 0.000019     |
| Copper (Cu)                          | 0.010 ± 0.0080                                                 | 0.21 ± 0.23         | 0.0033 ± 0.0036           | 0.021 ± 0.0024    | 0.0054 ± 0.0042   | 0.0075 ± 0.00012   | 0.0091 ± 0.0013   | 0.0017 ± 0.00012    |
| Zinc (Zn)                            | 0.0039 ± 0.0011                                                | 0.0091 ± 0.0039     | 0.0021 ± 0.0019           | 0.023 ± 0.027     | 0.0043 ± 0.0037   | 0.00 ± 0.000063    | 0.0034 ± 0.0018   | 0.00 ± 0.000063     |
| Arsenic (As)                         | 0.00059 ± 0.00069                                              | 0.0013 ± 0.0020     | 0.00 ± 0.000049           | 0.00 ± 0.000025   | 0.00 ± 0.000030   | 0.00 ± 0.000030    | 0.00 ± 0.000036   | 0.0028 ± 0.000030   |
| Selenium (Se)                        | 0.0011 ± 0.0014                                                | 0.0023 ± 0.0018     | 0.0037 ± 0.0025           | 0.00016 ± 0.00023 | 0.0019 ± 0.0010   | 0.00 ± 0.000052    | 0.00086 ± 0.0012  | 0.00 ± 0.000052     |
| Bromine (Br)                         | 0.030 ± 0.015                                                  | 0.0090 ± 0.0049     | 0.022 ± 0.0072            | 0.0088 ± 0.0036   | 0.011 ± 0.0015    | 0.012 ± 0.000015   | 0.012 ± 0.0026    | 0.0044 ± 0.000015   |
| Rubidium (Rb)                        | 0.00038 ± 0.00077                                              | 0.0015 ± 0.0014     | 0.0015 ± 0.0026           | 0.00 ± 0.000016   | 0.00039 ± 0.00056 | 0.00035 ± 0.000019 | 0.00 ± 0.000023   | 0.0017 ± 0.000019   |
| Strontium (Sr)                       | 0.0051 ± 0.0012                                                | 0.0044 ± 0.0023     | 0.0055 ± 0.0063           | 0.0033 ± 0.0022   | 0.0028 ± 0.00026  | 0.0021 ± 0.000019  | 0.0070 ± 0.00099  | 0.0029 ± 0.000019   |
| Yttrium (Y)                          | 0.0043 ± 0.0051                                                | 0.0021 ± 0.0034     | 0.0014 ± 0.00060          | 0.00 ± 0.0000016  | 0.0018 ± 0.0023   | 0.0032 ± 0.000019  | 0.0018 ± 0.0016   | 0.0027 ± 0.000019   |
| Zirconium (Zr)                       | 0.0041 ± 0.0038                                                | 0.0049 ± 0.0066     | 0.0040 ± 0.0069           | 0.0051 ± 0.0039   | 0.0048 ± 0.00038  | 0.0016 ± 0.000071  | 0.00052 ± 0.00074 | 0.00 ± 0.000071     |
| Niobium (Nb)                         | 0.0016 ± 0.0022                                                | 0.00080 ± 0.0013    | 0.0019 ± 0.0026           | 0.00 ± 0.000029   | 0.00095 ± 0.0014  | 0.00 ± 0.000034    | 0.0021 ± 0.0030   | 0.00026 ± 0.000034  |
| Molybdenum (Mo)                      | 0.0022 ± 0.0021                                                | 0.0013 ± 0.0017     | 0.0012 ± 0.0022           | 0.00081 ± 0.0011  | 0.00071 ± 0.0010  | 0.00 ± 0.000071    | 0.0044 ± 0.00018  | 0.0032 ± 0.000071   |
| Silver (Ag)                          | 0.0014 ± 0.0029                                                | 0.00 ± 0.00014      | 0.00 ± 0.00015            | 0.00 ± 0.000076   | 0.0025 ± 0.0035   | 0.00 ± 0.000089    | 0.0026 ± 0.0037   | 0.00 ± 0.000089     |
| Cadmium (Cd)                         | 0.00 ± 0.00022                                                 | 0.00 ± 0.00019      | 0.0075 ± 0.013            | 0.0095 ± 0.0060   | 0.00044 ± 0.00063 | 0.00 ± 0.00012     | 0.00 ± 0.00015    | 0.00 ± 0.00012      |
| Indium (In)                          | 0.0069 ± 0.0049                                                | 0.0023 ± 0.0046     | 0.0054 ± 0.0093           | 0.0012 ± 0.0017   | 0.0048 ± 0.0067   | 0.0013 ± 0.000085  | 0.00087 ± 0.0012  | 0.00 ± 0.000085     |
| Tin (Sn)                             | 0.0061 ± 0.0072                                                | 0.0058 ± 0.012      | 0.0061 ± 0.0058           | 0.0068 ± 0.0096   | 0.0022 ± 0.0031   | 0.013 ± 0.00016    | 0.0038 ± 0.0054   | 0.012 ± 0.00016     |
| Antimony (Sb)                        | 0.00028 ± 0.00056                                              | 0.00040 ± 0.00052   | 0.00033 ± 0.00057         | 0.00050 ± 0.00071 | 0.00 ± 0.00024    | 0.0039 ± 0.00023   | 0.011 ± 0.0097    | 0.00 ± 0.00023      |
| Cesium (Cs)                          | 0.00088 ± 0.00018                                              | 0.028 ± 0.037       | 0.037 ± 0.064             | 0.00 ± 0.00057    | 0.028 ± 0.031     | 0.020 ± 0.00066    | 0.0077 ± 0.011    | 0.00 ± 0.00066      |
| Barium (Ba)                          | 0.00 ± 0.00088                                                 | 0.00 ± 0.00085      | 0.00 ± 0.00081            | 0.00 ± 0.00044    | 0.00 ± 0.00050    | 0.00 ± 0.00050     | 0.00 ± 0.00060    | 0.00 ± 0.00050      |
| Lanthanum (La)                       | 0.054 ± 0.039                                                  | 0.033 ± 0.039       | 0.036 ± 0.039             | 0.0049 ± 0.0070   | 0.041 ± 0.058     | 0.00 ± 0.00097     | 0.018 ± 0.025     | 0.080 ± 0.00097     |
| Wolfram (W)                          | 0.010 ± 0.012                                                  | 0.0030 ± 0.0051     | 0.0080 ± 0.014            | 0.00 ± 0.00016    | 0.00 ± 0.00019    | 0.0058 ± 0.00019   | 0.00 ± 0.00023    | 0.00 ± 0.00019      |
| Gold (Au)                            | 0.0012 ± 0.0013                                                | 0.00082 ± 0.0016    | 0.0046 ± 0.0045           | 0.00033 ± 0.00047 | 0.00051 ± 0.00072 | 0.00 ± 0.000056    | 0.00041 ± 0.00058 | 0.00 ± 0.000056     |
| Mercury (Hg)                         | 0.00035 ± 0.00070                                              | 0.00091 ± 0.0015    | 0.00 ± 0.000049           | 0.00 ± 0.000025   | 0.00 ± 0.000030   | 0.00 ± 0.000030    | 0.00041 ± 0.00058 | 0.000087 ± 0.000030 |
| Lead (Pb)                            | 0.0017 ± 0.0035                                                | 0.0012 ± 0.0024     | 0.0018 ± 0.0031           | 0.0028 ± 0.0026   | 0.0031 ± 0.0044   | 0.00052 ± 0.000056 | 0.0016 ± 0.0022   | 0.00 ± 0.000056     |
| Uranium (U)                          | 0.0027 ± 0.0031                                                | 0.0023 ± 0.0026     | 0.0044 ± 0.0077           | 0.0017 ± 0.0023   | 0.00 ± 0.00010    | 0.0033 ± 0.00010   | 0.0057 ± 0.00076  | 0.0062 ± 0.00010    |

<sup>a</sup>Analytical uncertainties are used for species below the minimum detection limit, mostly for carbohydrate species and elements with an average concentration of 0.00

825



826 <sup>b</sup>Only one sample was analyzed for elements by x-ray fluorescence with abundance and measurement uncertainty  
827 <sup>c</sup>Peat ID code, detailed operation parameters are reported in Watson et al. (2019)  
828 <sup>d</sup>Data not available; water-soluble K<sup>+</sup> data were contaminated for aged samples due to the use of potassium iodide denuder downstream of the oxidation flow reactor  
829 <sup>e</sup>WSOC measures from Peat sample ID PEAT028 was invalidated due to a crack in the test tube. Therefore, only two measurements are used to calculate the average and standard deviation.  
830 <sup>f</sup>Data not available due to the invalidated citric acid impregnated filter sample  
831 <sup>g</sup>The carbon analysis follows the IMPROVE\_A thermal/optical reflectance protocol (Chow et al., 2007) that is applied in long-term U.S. non-urban IMPROVE and urban Chemical Speciation Network.  
832 Organic carbon (OC) is the sum of OC1+OC2+OC3+OC4 plus pyrolyzed carbon (OP). Elemental carbon (EC) is the sum of EC1+EC2+EC3 minus OP. Total carbon is the sum of OC and EC. Since a  
833 large fraction of OP (7–13 %) are found in smoldering peat combustion emissions--indicative of higher molecular-weight compounds that are likely to char, the resulting EC are lower than the individual  
834 EC fraction after OP correction.

Table 2. Equivalence measures<sup>a</sup> for comparison of PM<sub>2.5</sub> peat source profiles.

| A All Fresh (Profile #1) vs. All Aged (Profile #2) by Biome (group comparison of fresh and aged samples) |                           |                 |                 |                      |                |                |              |                         |                      |
|----------------------------------------------------------------------------------------------------------|---------------------------|-----------------|-----------------|----------------------|----------------|----------------|--------------|-------------------------|----------------------|
| Peat region <sup>b</sup>                                                                                 | Peats Included            | n1 <sup>c</sup> | n2 <sup>c</sup> | Percent Distribution |                |                |              | Correlation Coefficient | P-value <sup>d</sup> |
|                                                                                                          |                           |                 |                 | < 1 $\sigma$         | 1 - 2 $\sigma$ | 2 - 3 $\sigma$ | > 3 $\sigma$ |                         |                      |
| Boreal                                                                                                   | Russia + Siberia          | 12              | 12              | 93.60%               | 5.60%          | 0.80%          | 0.00%        | 0.995                   | 0.00012              |
| Boreal + Temperate                                                                                       | Russia + Siberia + Alaska | 17              | 17              | 95.20%               | 4.80%          | 0.00%          | 0.00%        | 0.996                   | 0.00010              |
| Temperate                                                                                                | Alaska                    | 5               | 5               | 96.00%               | 4.00%          | 0.00%          | 0.00%        | 0.997                   | 0.00008              |
| Subtropical 1                                                                                            | Florida-1 (FL1)           | 4               | 4               | 77.60%               | 14.40%         | 5.60%          | 2.40%        | 0.993                   | 0.94570              |
| Subtropical 2                                                                                            | Florida-2 (FL2)           | 7               | 7               | 77.78%               | 21.43%         | 0.79%          | 0.00%        | 0.986                   | 0.00001              |
| Subtropical 1 + Temperate                                                                                | Florida-1 + Alaska        | 9               | 9               | 96.83%               | 3.17%          | 0.00%          | 0.00%        | 0.996                   | 0.00073              |
| Subtropical 2 + Temperate                                                                                | Florida-2 + Alaska        | 12              | 12              | 81.75%               | 18.25%         | 0.00%          | 0.00%        | 0.992                   | 0.00001              |
| Tropical                                                                                                 | Malaysia                  | 4               | 4               | 78.57%               | 18.25%         | 1.59%          | 1.59%        | 0.994                   | 0.00195              |
| Subtropical 1 + Tropical                                                                                 | Florida-1 + Malaysia      | 8               | 8               | 83.33%               | 15.87%         | 0.00%          | 0.79%        | 0.995                   | 0.01686              |
| Subtropical 2 + Tropical                                                                                 | Florida-2 + Malaysia      | 11              | 11              | 80.16%               | 19.05%         | 0.79%          | 0.00%        | 0.991                   | 0.00003              |

  

| B Fresh 2 vs. Aged 2 by Biome (paired comparison for 2-day aging) |                           |    |    |                      |                |                |              |                         |         |
|-------------------------------------------------------------------|---------------------------|----|----|----------------------|----------------|----------------|--------------|-------------------------|---------|
| Peat region                                                       | Peats Included            | n1 | n2 | Percent Distribution |                |                |              | Correlation Coefficient | P-value |
|                                                                   |                           |    |    | < 1 $\sigma$         | 1 - 2 $\sigma$ | 2 - 3 $\sigma$ | > 3 $\sigma$ |                         |         |
| Boreal                                                            | Russia + Siberia          | 6  | 6  | 94.40%               | 3.20%          | 2.40%          | 0.00%        | 0.997                   | 0.00088 |
| Boreal + Temperate                                                | Russia + Siberia + Alaska | 9  | 9  | 95.20%               | 4.00%          | 0.80%          | 0.00%        | 0.997                   | 0.00237 |
| Temperate                                                         | Alaska                    | 3  | 3  | 86.40%               | 11.20%         | 0.80%          | 1.60%        | 0.997                   | 0.02474 |
| Subtropical 1                                                     | Florida-1                 | 2  | 2  | 78.86%               | 13.82%         | 3.25%          | 4.07%        | 0.994                   | 0.30785 |
| Subtropical 2                                                     | Florida-2                 | 4  | 4  | 86.51%               | 11.90%         | 0.79%          | 0.79%        | 0.992                   | 0.00000 |
| Subtropical 1 + Temperate                                         | Florida-1 + Alaska        | 5  | 5  | 92.00%               | 7.20%          | 0.80%          | 0.00%        | 0.997                   | 0.04329 |
| Subtropical 2 + Temperate                                         | Florida-2 + Alaska        | 7  | 7  | 95.24%               | 3.97%          | 0.00%          | 0.79%        | 0.996                   | 0.00002 |
| Tropical                                                          | Malaysia                  | 2  | 2  | 80.00%               | 5.33%          | 5.33%          | 9.33%        | 0.996                   | 0.95960 |
| Subtropical 1 + Tropical                                          | Florida-1 + Malaysia      | 4  | 4  | 88.89%               | 8.73%          | 1.59%          | 0.79%        | 0.996                   | 0.62905 |
| Subtropical 2 + Tropical                                          | Florida-2 + Malaysia      | 6  | 6  | 93.65%               | 5.56%          | 0.00%          | 0.79%        | 0.995                   | 0.00002 |

  

| C Fresh 7 vs. Aged 7 by Biome (paired comparison for 7-day aging) |                           |    |    |                      |                |                |              |                         |         |
|-------------------------------------------------------------------|---------------------------|----|----|----------------------|----------------|----------------|--------------|-------------------------|---------|
| Peat region                                                       | Peats Included            | n1 | n2 | Percent Distribution |                |                |              | Correlation Coefficient | P-value |
|                                                                   |                           |    |    | < 1 $\sigma$         | 1 - 2 $\sigma$ | 2 - 3 $\sigma$ | > 3 $\sigma$ |                         |         |
| Boreal                                                            | Russia + Siberia          | 6  | 6  | 76.00%               | 20.80%         | 1.60%          | 1.60%        | 0.992                   | 0.00007 |
| Boreal + Temperate                                                | Russia + Siberia + Alaska | 8  | 8  | 76.80%               | 20.00%         | 0.80%          | 2.40%        | 0.993                   | 0.00003 |
| Temperate                                                         | Alaska                    | 2  | 2  | 64.86%               | 25.68%         | 2.70%          | 6.76%        | 0.993                   | 0.00000 |
| Subtropical 1                                                     | Florida-1                 | 2  | 2  | 63.20%               | 13.60%         | 7.20%          | 16.00%       | 0.998                   | 0.00027 |
| Subtropical 2                                                     | Florida-2                 | 3  | 3  | 66.67%               | 9.52%          | 3.17%          | 20.63%       | 0.975                   | 0.00003 |
| Subtropical 1 + Temperate                                         | Florida-1 + Alaska        | 4  | 4  | 88.10%               | 7.94%          | 3.97%          | 0.00%        | 0.994                   | 0.00004 |
| Subtropical 2 + Temperate                                         | Florida-2 + Alaska        | 5  | 5  | 73.02%               | 19.84%         | 3.97%          | 3.17%        | 0.984                   | 0.00001 |
| Tropical                                                          | Malaysia                  | 2  | 2  | 41.33%               | 21.33%         | 24.00%         | 13.33%       | 0.989                   | 0.00017 |
| Subtropical 1 + Tropical                                          | Florida-1 + Malaysia      | 4  | 4  | 72.22%               | 23.81%         | 0.79%          | 3.17%        | 0.993                   | 0.00156 |
| Subtropical 2 + Tropical                                          | Florida-2 + Malaysia      | 5  | 5  | 73.02%               | 8.73%          | 1.59%          | 16.67%       | 0.983                   | 0.00004 |

  

| D Fresh 2 vs. Fresh 7 by Biome (comparison between different experiments for unaged fresh profiles) |                           |    |    |                      |                |                |              |                         |         |
|-----------------------------------------------------------------------------------------------------|---------------------------|----|----|----------------------|----------------|----------------|--------------|-------------------------|---------|
| Peat region                                                                                         | Peats Included            | n1 | n2 | Percent Distribution |                |                |              | Correlation Coefficient | P-value |
|                                                                                                     |                           |    |    | < 1 $\sigma$         | 1 - 2 $\sigma$ | 2 - 3 $\sigma$ | > 3 $\sigma$ |                         |         |
| Boreal                                                                                              | Russia + Siberia          | 6  | 6  | 97.62%               | 2.38%          | 0.00%          | 0.00%        | 0.999                   | 0.00004 |
| Boreal + Temperate                                                                                  | Russia + Siberia + Alaska | 9  | 8  | 100.00%              | 0.00%          | 0.00%          | 0.00%        | 0.999                   | 0.00148 |
| Temperate                                                                                           | Alaska                    | 3  | 2  | 91.27%               | 6.35%          | 0.79%          | 1.59%        | 0.996                   | 0.12876 |
| Subtropical 1                                                                                       | Florida-1                 | 2  | 2  | 90.32%               | 6.45%          | 1.61%          | 1.61%        | 0.999                   | 0.00001 |
| Subtropical 2                                                                                       | Florida-2                 | 4  | 3  | 97.62%               | 1.59%          | 0.79%          | 0.00%        | 0.999                   | 0.00032 |
| Subtropical 1 + Temperate                                                                           | Florida-1 + Alaska        | 5  | 4  | 99.21%               | 0.79%          | 0.00%          | 0.00%        | 0.998                   | 0.00308 |
| Subtropical 2 + Temperate                                                                           | Florida-2 + Alaska        | 7  | 5  | 100.00%              | 0.00%          | 0.00%          | 0.00%        | 0.998                   | 0.02743 |
| Tropical                                                                                            | Malaysia                  | 2  | 2  | 81.10%               | 10.24%         | 3.15%          | 5.51%        | 0.999                   | 0.00006 |
| Subtropical 1 + Tropical                                                                            | Florida-1 + Malaysia      | 4  | 4  | 94.49%               | 4.72%          | 0.79%          | 0.00%        | 1.000                   | 0.00357 |
| Subtropical 2 + Tropical                                                                            | Florida-2 + Malaysia      | 6  | 5  | 98.43%               | 1.57%          | 0.00%          | 0.00%        | 0.999                   | 0.00013 |

  

| E Aged 2 vs. Aged 7 by Biome (comparison between different experiments for the 2- and 7-day aging times) |                           |    |    |                      |                |                |              |                         |         |
|----------------------------------------------------------------------------------------------------------|---------------------------|----|----|----------------------|----------------|----------------|--------------|-------------------------|---------|
| Peat region                                                                                              | Peats Included            | n1 | n2 | Percent Distribution |                |                |              | Correlation Coefficient | P-value |
|                                                                                                          |                           |    |    | < 1 $\sigma$         | 1 - 2 $\sigma$ | 2 - 3 $\sigma$ | > 3 $\sigma$ |                         |         |
| Boreal                                                                                                   | Russia + Siberia          | 6  | 6  | 95.20%               | 3.20%          | 1.60%          | 0.00%        | 0.997                   | 0.00018 |
| Boreal + Temperate                                                                                       | Russia + Siberia + Alaska | 9  | 8  | 94.40%               | 3.20%          | 1.60%          | 0.80%        | 0.998                   | 0.00002 |
| Temperate                                                                                                | Alaska                    | 3  | 2  | 66.22%               | 27.03%         | 5.41%          | 1.35%        | 0.996                   | 0.00000 |
| Subtropical 1                                                                                            | Florida-1                 | 2  | 2  | 83.20%               | 9.60%          | 1.60%          | 5.60%        | 1.000                   | 0.00017 |
| Subtropical 2                                                                                            | Florida-2                 | 4  | 3  | 88.89%               | 8.73%          | 0.00%          | 2.38%        | 0.994                   | 0.00298 |
| Subtropical 1 + Temperate                                                                                | Florida-1 + Alaska        | 5  | 4  | 94.44%               | 5.56%          | 0.00%          | 0.00%        | 0.999                   | 0.00000 |
| Subtropical 2 + Temperate                                                                                | Florida-2 + Alaska        | 7  | 5  | 81.75%               | 16.67%         | 0.00%          | 1.59%        | 0.997                   | 0.00003 |
| Tropical                                                                                                 | Malaysia                  | 2  | 2  | 81.33%               | 13.33%         | 1.33%          | 4.00%        | 0.997                   | 0.00002 |
| Subtropical 1 + Tropical                                                                                 | Florida-1 + Malaysia      | 4  | 4  | 92.06%               | 7.14%          | 0.79%          | 0.00%        | 0.999                   | 0.00002 |
| Subtropical 2 + Tropical                                                                                 | Florida-2 + Malaysia      | 6  | 5  | 93.65%               | 3.97%          | 0.79%          | 1.59%        | 0.996                   | 0.00035 |

<sup>a</sup>For the *t*-test, a cutoff probability level of 5% is selected; if  $P < 0.05$ , there is a 95% probability that the two profiles are different. For correlations,  $r > 0.8$  suggests similar profiles,  $0.5 < r < 0.8$  indicates a moderate similarity, and  $r < 0.5$  denotes little or no similarity. The *R/U* ratio indicates the percentage of the  $> 93$  reported chemical abundances differ by more than an expected number of uncertainty intervals. The normal probability density function of 68%, 95.5%, and 99.7% for  $\pm 1\sigma$ ,  $\pm 2\sigma$ , and  $\pm 3\sigma$ , respectively, is used to evaluate the *R/U* ratios. The two profiles are considered to be similar, within the uncertainties of the chemical abundances when 80% of the *R/U* ratios are within  $\pm 3\sigma$ , with  $r > 0.8$  and  $P > 0.05$ . Species with *R/U* ratios  $> 3\sigma$  are further examined as these may be markers that further allow source contributions to be distinguished by receptor measurements. They may also reflect the sampling and analysis artifacts that are not representative of the larger population of source profiles.

<sup>b</sup>Unless otherwise noted, Boreal represents Russia and Siberia regions, Temperate represents northern Alaska region, Subtropical is divided into Subtropical 1 for Putnam (FL1) and Subtropical 2 for Everglades (FL2) peats, and Tropical represents Island of Borneo, Malaysia region.

<sup>c</sup>n1 and n2 denote number of samples in comparison

<sup>d</sup>Student *t*-test *P*-values

Table 3. Organic carbon diagnostic ratios for different peat samples.

| Peat Type                                 | Atmospheric Aging time | OC/TC $\pm \sigma^a$ | OM <sup>b</sup> /OC $\pm \sigma^a$ | WSOC <sup>c</sup> /OC $\pm \sigma^a$ | (Levoglucosan/2.25) <sup>d</sup> /OC $\pm \sigma^a$ | (Oxalic acid/3.75) <sup>e</sup> /OC $\pm \sigma^a$ | (Levoglucosan/2.25) <sup>d</sup> /WSOC $\pm \sigma^a$ | (Oxalic acid/3.75) <sup>e</sup> /WSOC $\pm \sigma^a$ |
|-------------------------------------------|------------------------|----------------------|------------------------------------|--------------------------------------|-----------------------------------------------------|----------------------------------------------------|-------------------------------------------------------|------------------------------------------------------|
| Odintsovo, Russia                         | Fresh 2                | 0.97 $\pm$ 0.11      | 1.7 $\pm$ 0.15                     | 0.64 $\pm$ 0.075                     | 0.27 $\pm$ 0.066                                    | 0.00047 $\pm$ 0.00029                              | 0.42 $\pm$ 0.10                                       | 0.00073 $\pm$ 0.00045                                |
|                                           | Aged 2                 | 0.97 $\pm$ 0.30      | 2.1 $\pm$ 0.46                     | 0.70 $\pm$ 0.17                      | 0.24 $\pm$ 0.10                                     | 0.0057 $\pm$ 0.0017                                | 0.35 $\pm$ 0.13                                       | 0.0082 $\pm$ 0.0019                                  |
|                                           | Fresh 7                | 0.97 $\pm$ 0.12      | 1.6 $\pm$ 0.14                     | 0.59 $\pm$ 0.065                     | 0.28 $\pm$ 0.030                                    | 0.0012 $\pm$ 0.001                                 | 0.48 $\pm$ 0.040                                      | 0.0021 $\pm$ 0.0017                                  |
|                                           | Aged 7                 | 0.95 $\pm$ 0.16      | 2.2 $\pm$ 0.26                     | 0.71 $\pm$ 0.18                      | 0.21 $\pm$ 0.051                                    | 0.019 $\pm$ 0.0055                                 | 0.30 $\pm$ 0.089                                      | 0.026 $\pm$ 0.0090                                   |
| Pskov, Siberia                            | Fresh 2                | 0.96 $\pm$ 0.12      | 1.3 $\pm$ 0.12                     | 0.32 $\pm$ 0.039                     | 0.04 $\pm$ 0.016                                    | 0.00023 $\pm$ 0.000050                             | 0.12 $\pm$ 0.049                                      | 0.00069 $\pm$ 0.00015                                |
|                                           | Aged 2                 | 0.96 $\pm$ 0.26      | 1.4 $\pm$ 0.27                     | 0.44 $\pm$ 0.13                      | 0.027 $\pm$ 0.0066                                  | 0.0051 $\pm$ 0.0021                                | 0.063 $\pm$ 0.017                                     | 0.012 $\pm$ 0.0050                                   |
|                                           | Fresh 7                | 0.99 $\pm$ 0.17      | 1.2 $\pm$ 0.14                     | 0.40 $\pm$ 0.046                     | 0.051 $\pm$ 0.013                                   | 0.00025 $\pm$ 0.000067                             | 0.13 $\pm$ 0.055                                      | 0.00063 $\pm$ 0.00015                                |
|                                           | Aged 7                 | 0.96 $\pm$ 0.14      | 1.5 $\pm$ 0.18                     | 0.56 $\pm$ 0.17                      | 0.031 $\pm$ 0.0043                                  | 0.019 $\pm$ 0.0073                                 | 0.057 $\pm$ 0.018                                     | 0.035 $\pm$ 0.016                                    |
| Northern Alaska, USA                      | Fresh 2                | 0.97 $\pm$ 0.12      | 1.3 $\pm$ 0.10                     | 0.38 $\pm$ 0.12                      | 0.10 $\pm$ 0.047                                    | 0.00013 $\pm$ 0.00010                              | 0.27 $\pm$ 0.15                                       | 0.00035 $\pm$ 0.00028                                |
|                                           | Aged 2                 | 0.97 $\pm$ 0.17      | 1.4 $\pm$ 0.18                     | 0.40 $\pm$ 0.075                     | 0.11 $\pm$ 0.025                                    | 0.0033 $\pm$ 0.00073                               | 0.27 $\pm$ 0.063                                      | 0.0080 $\pm$ 0.0018                                  |
|                                           | Fresh 7                | 0.95 $\pm$ 0.38      | 1.4 $\pm$ 0.39                     | 0.45 $\pm$ 0.20                      | 0.061 $\pm$ 0.019                                   | 0.00016 $\pm$ 0.00023                              | 0.14 $\pm$ 0.052                                      | 0.00037 $\pm$ 0.00053                                |
|                                           | Aged 7                 | 0.96 $\pm$ 0.35      | 1.8 $\pm$ 0.44                     | 0.55 $\pm$ 0.16                      | 0.046 $\pm$ 0.029                                   | 0.018 $\pm$ 0.0053                                 | 0.084 $\pm$ 0.052                                     | 0.034 $\pm$ 0.0076                                   |
| Putnam County Lakebed, Florida, USA (FL1) | Fresh 2                | 0.95 $\pm$ 0.19      | 1.3 $\pm$ 0.18                     | 0.27 $\pm$ 0.074                     | 0.02 $\pm$ 0.0026                                   | 0.00019 $\pm$ 0.00026                              | 0.072 $\pm$ 0.017                                     | 0.00068 $\pm$ 0.0010                                 |
|                                           | Aged 2                 | 0.97 $\pm$ 0.10      | 1.4 $\pm$ 0.10                     | 0.32 $\pm$ 0.067                     | 0.018 $\pm$ 0.0013                                  | 0.0022 $\pm$ 0.0010                                | 0.054 $\pm$ 0.011                                     | 0.0068 $\pm$ 0.0033                                  |
|                                           | Fresh 7                | 0.98 $\pm$ 0.094     | 1.5 $\pm$ 0.10                     | 0.24 $\pm$ 0.024                     | 0.021 $\pm$ 0.0021                                  | na                                                 | 0.085 $\pm$ 0.009                                     | na                                                   |
|                                           | Aged 7                 | 0.98 $\pm$ 0.10      | 1.4 $\pm$ 0.11                     | 0.34 $\pm$ 0.034                     | 0.010 $\pm$ 0.0034                                  | 0.0044 $\pm$ 0.00082                               | 0.029 $\pm$ 0.010                                     | 0.013 $\pm$ 0.0023                                   |
| Everglades, Florida, USA (FL2)            | Fresh 2                | 0.95 $\pm$ 0.32      | 1.2 $\pm$ 0.28                     | 0.40 $\pm$ 0.14                      | 0.0061 $\pm$ 0.0077                                 | 0.00036 $\pm$ 0.00021                              | 0.015 $\pm$ 0.019                                     | 0.00089 $\pm$ 0.00054                                |
|                                           | Aged 2                 | 0.97 $\pm$ 0.31      | 1.5 $\pm$ 0.33                     | 0.46 $\pm$ 0.12                      | 0.0061 $\pm$ 0.0077                                 | 0.0044 $\pm$ 0.00082                               | 0.013 $\pm$ 0.017                                     | 0.0086 $\pm$ 0.0024                                  |
|                                           | Fresh 7                | 0.98 $\pm$ 0.11      | 1.1 $\pm$ 0.079                    | 0.40 $\pm$ 0.063                     | 0.012 $\pm$ 0.0035                                  | 0.00026 $\pm$ 0.000092                             | 0.029 $\pm$ 0.009                                     | 0.00064 $\pm$ 0.00024                                |
|                                           | Aged 7                 | 0.96 $\pm$ 0.11      | 1.6 $\pm$ 0.12                     | 0.45 $\pm$ 0.063                     | 0.0053 $\pm$ 0.007                                  | 0.016 $\pm$ 0.0031                                 | 0.012 $\pm$ 0.016                                     | 0.036 $\pm$ 0.0078                                   |
| Borneo, Malaysia                          | Fresh 2                | 0.99 $\pm$ 0.057     | 1.2 $\pm$ 0.051                    | 0.18 $\pm$ 0.014                     | 0.014 $\pm$ 0.00058                                 | 0.00087 $\pm$ 0.00042                              | 0.077 $\pm$ 0.005                                     | 0.0047 $\pm$ 0.0023                                  |
|                                           | Aged 2                 | 0.97 $\pm$ 0.33      | 1.3 $\pm$ 0.31                     | 0.31 $\pm$ 0.081                     | 0.014 $\pm$ 0.0067                                  | 0.0041 $\pm$ 0.0012                                | 0.044 $\pm$ 0.020                                     | 0.013 $\pm$ 0.0028                                   |
|                                           | Fresh 7                | 0.98 $\pm$ 0.018     | 1.2 $\pm$ 0.015                    | 0.21 $\pm$ 0.035                     | 0.024 $\pm$ 0.0027                                  | 0.0014 $\pm$ 0.00072                               | 0.11 $\pm$ 0.023                                      | 0.0067 $\pm$ 0.0036                                  |
|                                           | Aged 7                 | 0.99 $\pm$ 0.26      | 1.5 $\pm$ 0.29                     | 0.40 $\pm$ 0.079                     | 0.02 $\pm$ 0.0041                                   | 0.016 $\pm$ 0.0033                                 | 0.049 $\pm$ 0.0040                                    | 0.039 $\pm$ 0.0035                                   |

<sup>a</sup>Uncertainty associated with each ratio is calculated based on the square root of the individual uncertainties multiplied by the ratio (Bevington, 1969).

<sup>b</sup>OM (organic mass) is calculated by subtracting major ions (i.e., sum of NH<sub>4</sub><sup>+</sup>, NO<sub>3</sub><sup>-</sup>, and SO<sub>4</sub><sup>2-</sup>), crustal components (2.2Al + 2.49 Si + 1.63 Ca + 1.94 Ti + 2.42 Fe) and elemental carbon from PM<sub>2.5</sub> mass

<sup>c</sup>WSOC: water-soluble organic carbon

<sup>d</sup>Levoglucosan/2.25 represents carbon content in levoglucosan, based on the chemical composition C<sub>6</sub>H<sub>10</sub>O<sub>5</sub>.

<sup>e</sup>Oxalic acid/3.75 represents carbon content in oxalic acid based on the chemical composition C<sub>2</sub>H<sub>2</sub>O<sub>4</sub>.

839 (a) Upstream Filter Packs<sup>a,b</sup>

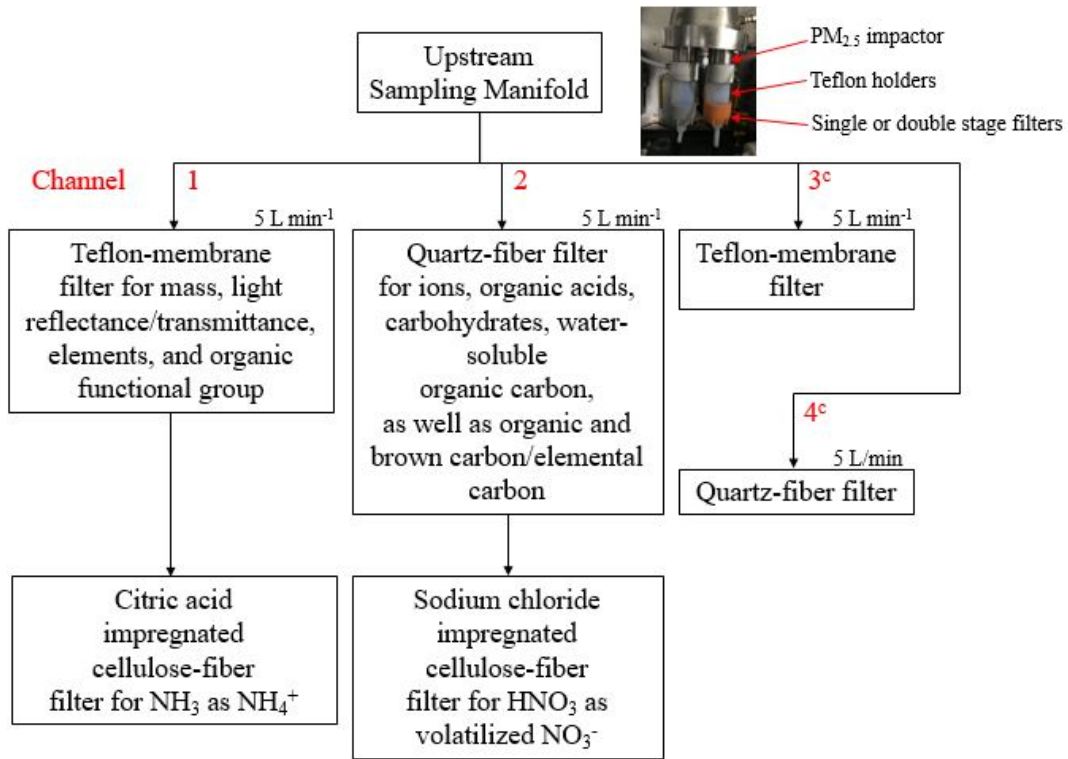

840

841 (b) Downstream Filter Packs<sup>a,b</sup>

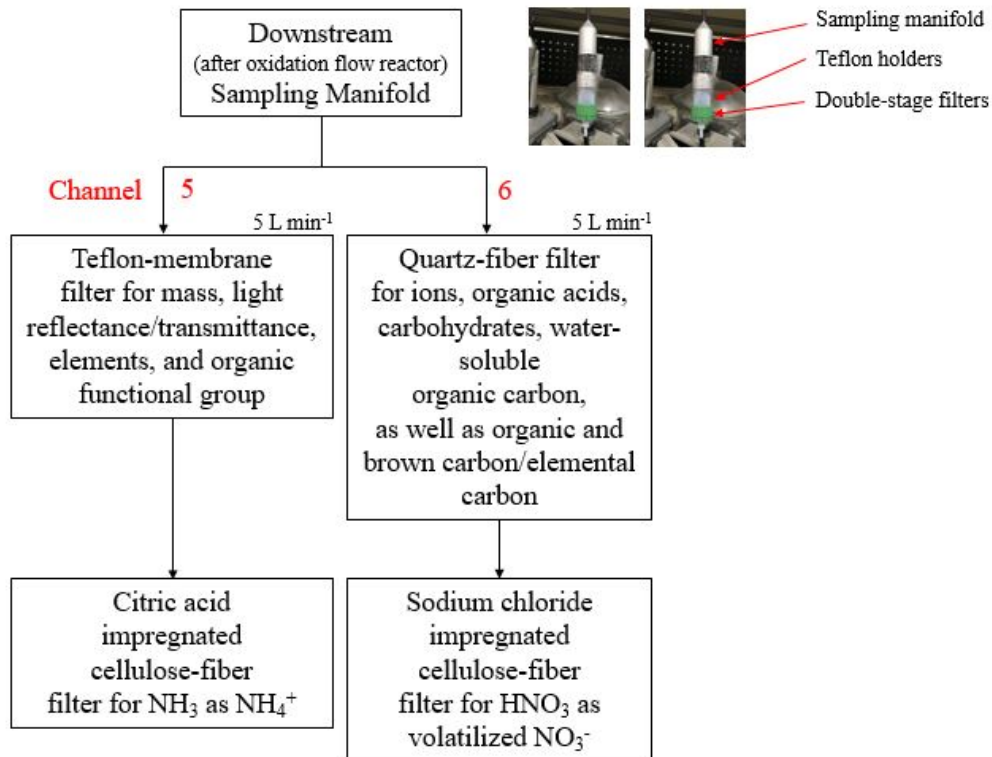

842

843

844 <sup>a</sup>The filter types are: 1) Teflon-membrane filter (Teflo<sup>®</sup>, 2 μm pore size, R2PJ047, Pall Life Sciences, Port Washington, NY,  
845 USA); 2) quartz-fiber filters (Tissuquartz, 2500 QAT-UP, Pall Life Sciences); and 3) citric acid and sodium chloride impregnated  
846 cellulose-fiber filters (31ET, Whatman Labware Products, St. Louis, MO, USA).  
847

848 <sup>b</sup>Analyses include: 1) mass by gravimetry (Model XP6 microbalance, Mettler-Toledo, Columbus, OH, USA); 2) light  
849 reflectance/transmittance by UV/Vis spectrometry (Lambda35, Perkin Elmer, Waltham, MA, USA); 3) multiple elements by  
850 energy-dispersive x-ray fluorescence (XRF) (Epsilon 5 PANalytical, Westborough, MA, USA); 4) four anions (chloride [Cl<sup>-</sup>],  
851 nitrite [NO<sub>2</sub><sup>-</sup>], nitrate [NO<sub>3</sub><sup>-</sup>], and sulfate [SO<sub>4</sub><sup>=</sup>]); three cations (water-soluble sodium [Na<sup>+</sup>], potassium [K<sup>+</sup>], and ammonium  
852 [NH<sub>4</sub><sup>+</sup>]); and ten organic acids (i.e., formic acid, acetic acid, lactic acid, methanesulfonic acid, oxalic acid, propionic acid,  
853 succinic acid, maleic acid, malonic acid, and glutaric acid) by ion chromatography (IC) with conductivity detector (Dionex  
854 Model ICS-5000+, Thermo Scientific, Waltham, MA, USA); 5) 17 carbohydrates (i.e., levoglucosan, mannosan, galactosan,  
855 glycerol, 2-methylerythritol, arabitol, mannitol, xylitol, erythritol, adonitol, inositol, glucose, galactose, arabinose, fructose,  
856 sucrose, and trehalose) by IC with pulsed amperometric detector (Dionex Model ICS3000, Thermo Scientific, Waltham, MA,  
857 USA); 6) water-soluble organic carbon (WSOC) by total organic carbon analyzer with non-dispersive infrared (NDIR) detector  
858 (Shimadzu Corporation, Kyoto, Japan); 7) organic functional groups by Fourier-Transform Infrared (FTIR) spectroscopy  
859 (VERTEX 70, Bruker, Billerica, MA, USA); and 8) organic, elemental, and brown carbon (OC, EC, and BrC) by  
860 multiwavelength thermal/optical carbon analyzer (DRI Model 2015, Magee Scientific, Berkeley, CA, USA).  
861

862 <sup>c</sup>Teflon-membrane filter samples from Channel 3 are to be analyzed for additional organic nitrogen speciation using Fourier  
863 transform-ion cyclotron resonance mass spectrometry (FT-ICR-MS) at the Michigan Technological University. Quartz-fiber filter  
864 samples from Channel 4 are to be analyzed for polar and non-polar organics at the Hong Kong Premium Services and Research  
865 Laboratory.  
866

867 Figure 1. Filter pack sampling configurations for upstream and downstream channels of the  
868 oxidation flow reactor.  
869



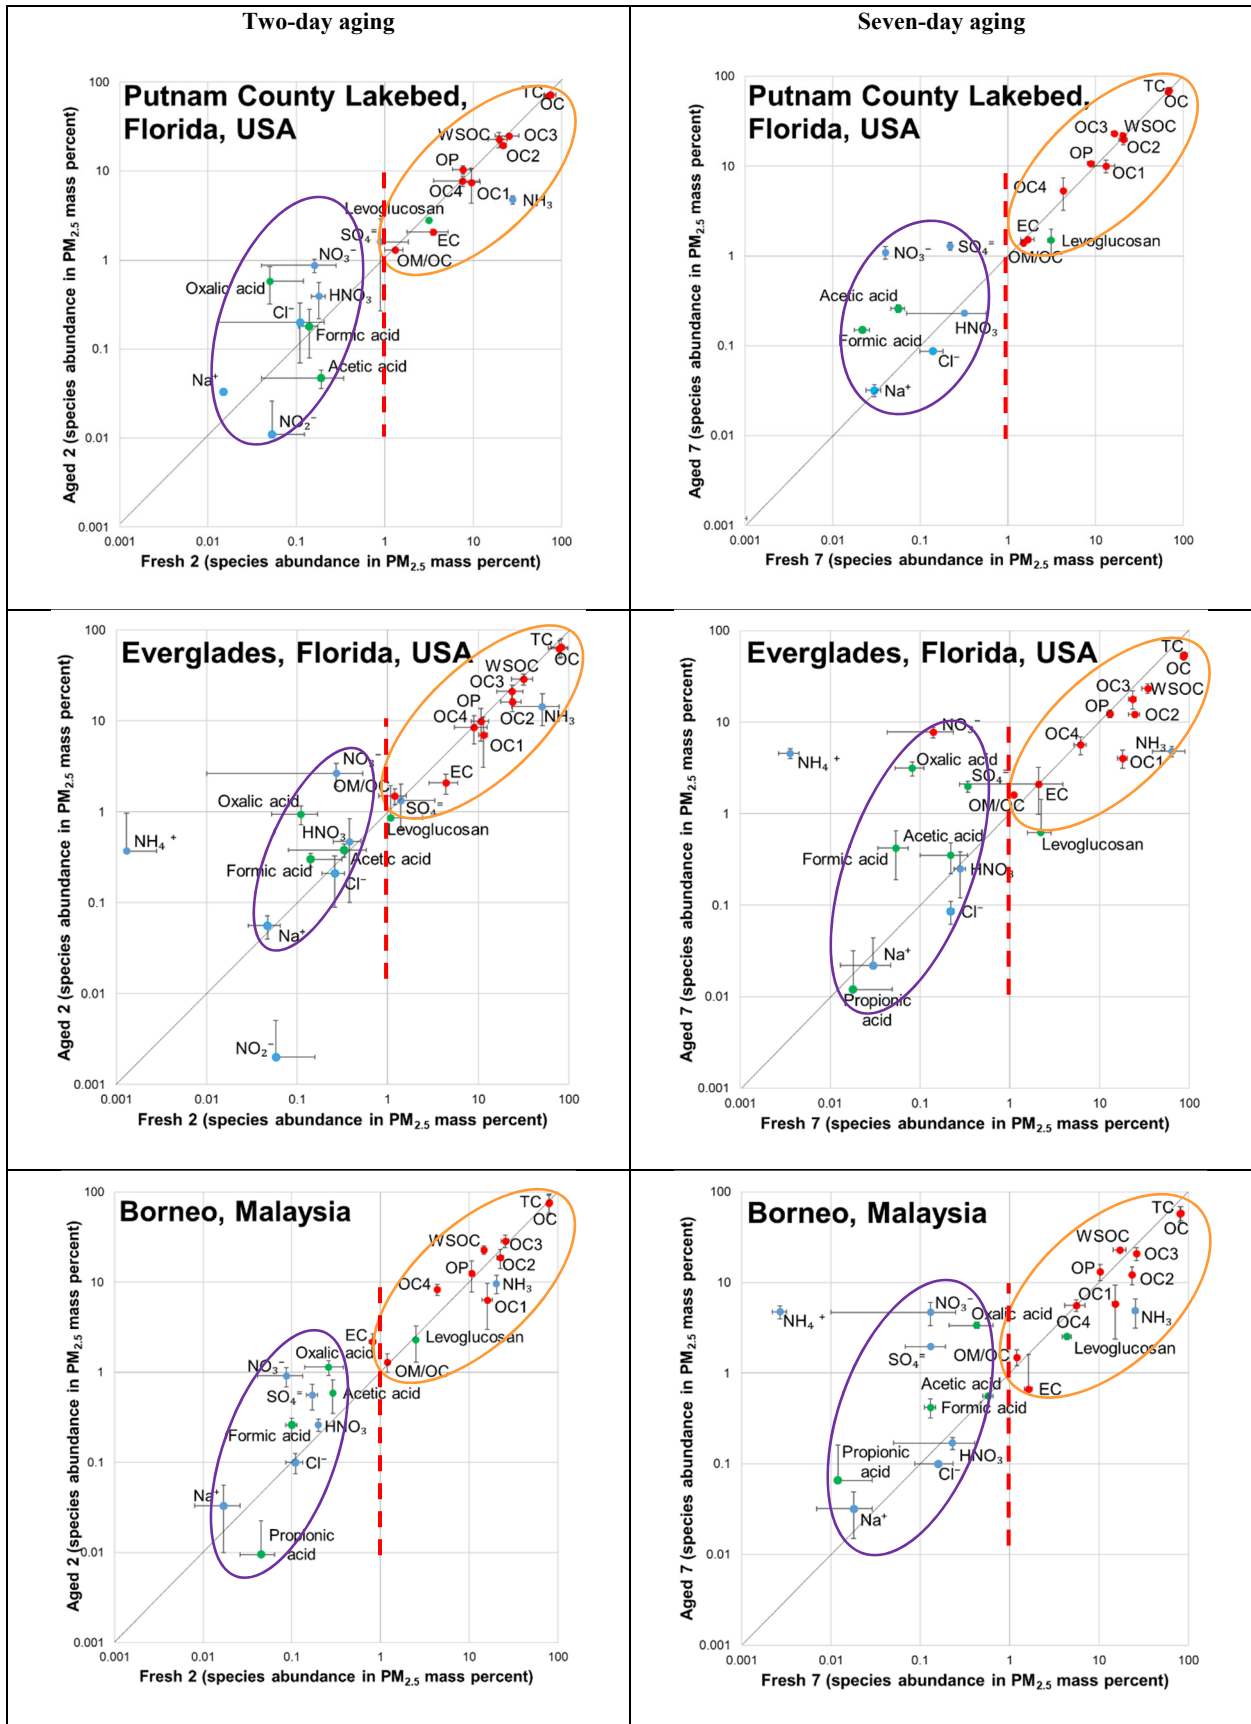

870 Figure 2. Comparison between fresh and aged profile chemical abundances for each of the six  
871 types of peat with 2- and 7-day aging times. Standard deviations associated with averages in x and  
872 y axes are also shown. Vertical dashlines (red) on 1 % in x-axis intended to delineate the two  
873 distinguished clusters: centered around 0.1 % for reactive/ionic species and centered around 10 %  
874 for carbon compounds.  
875



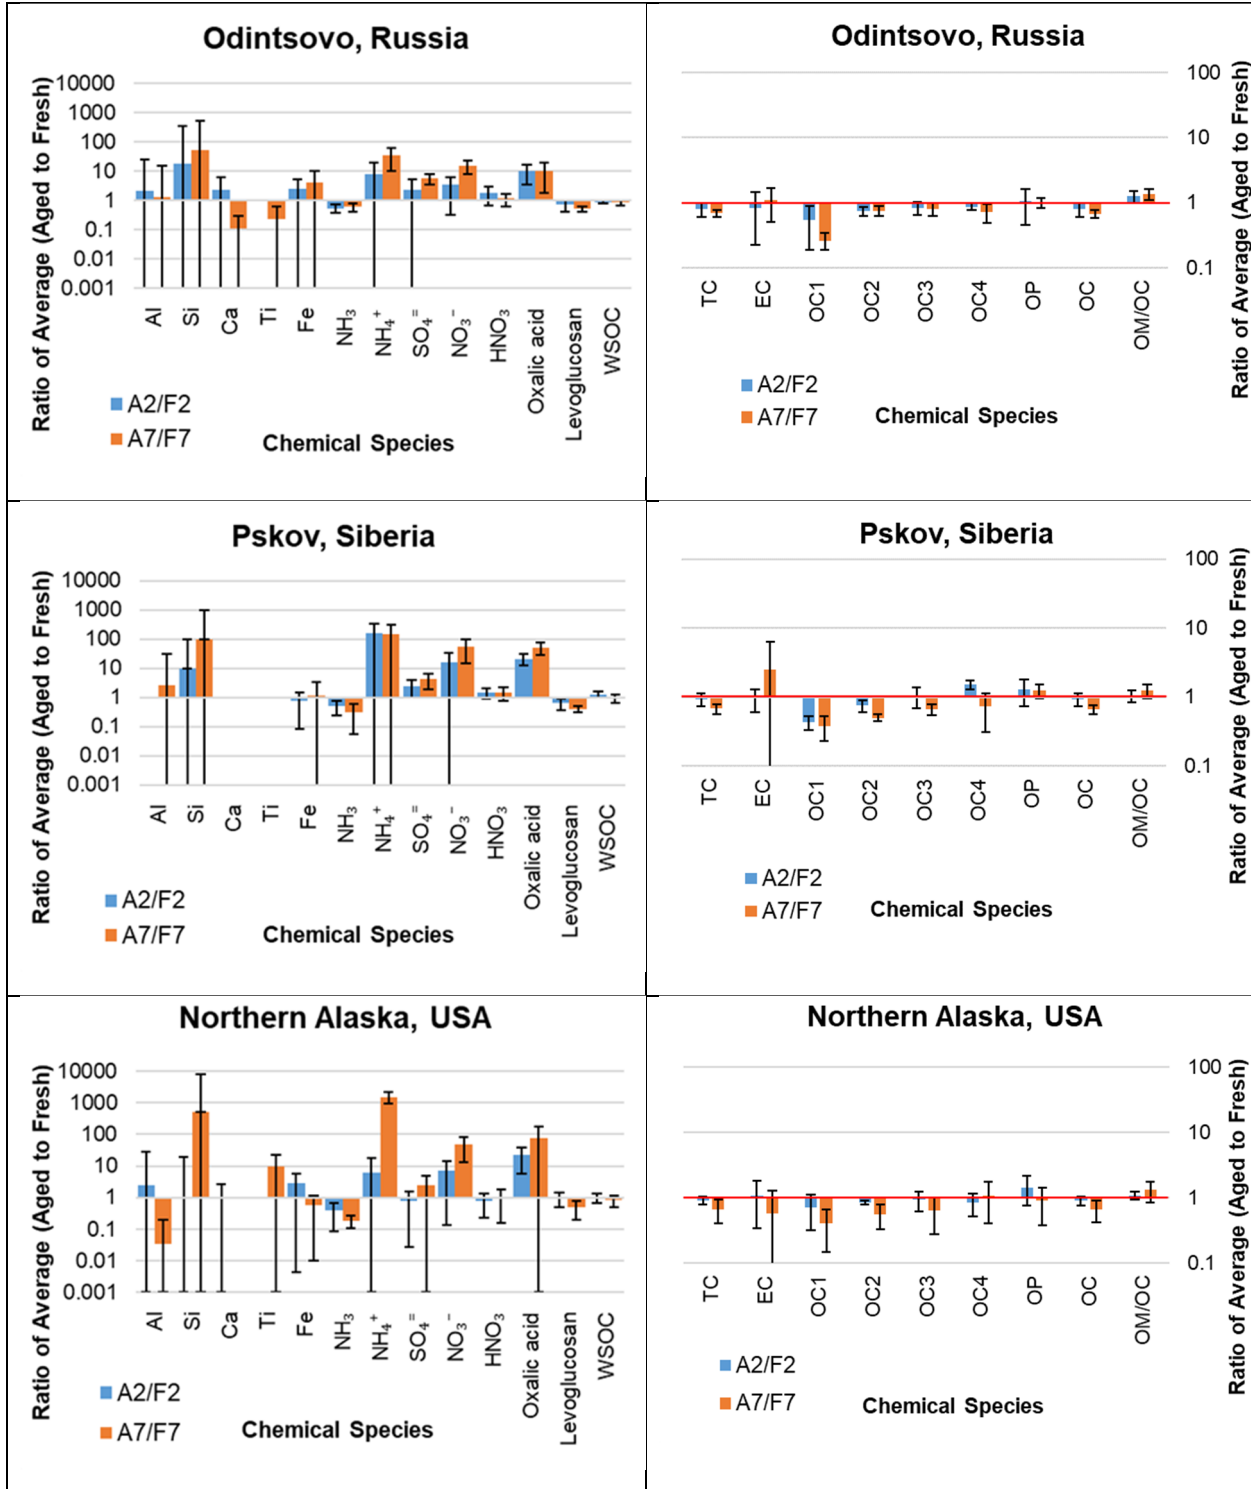

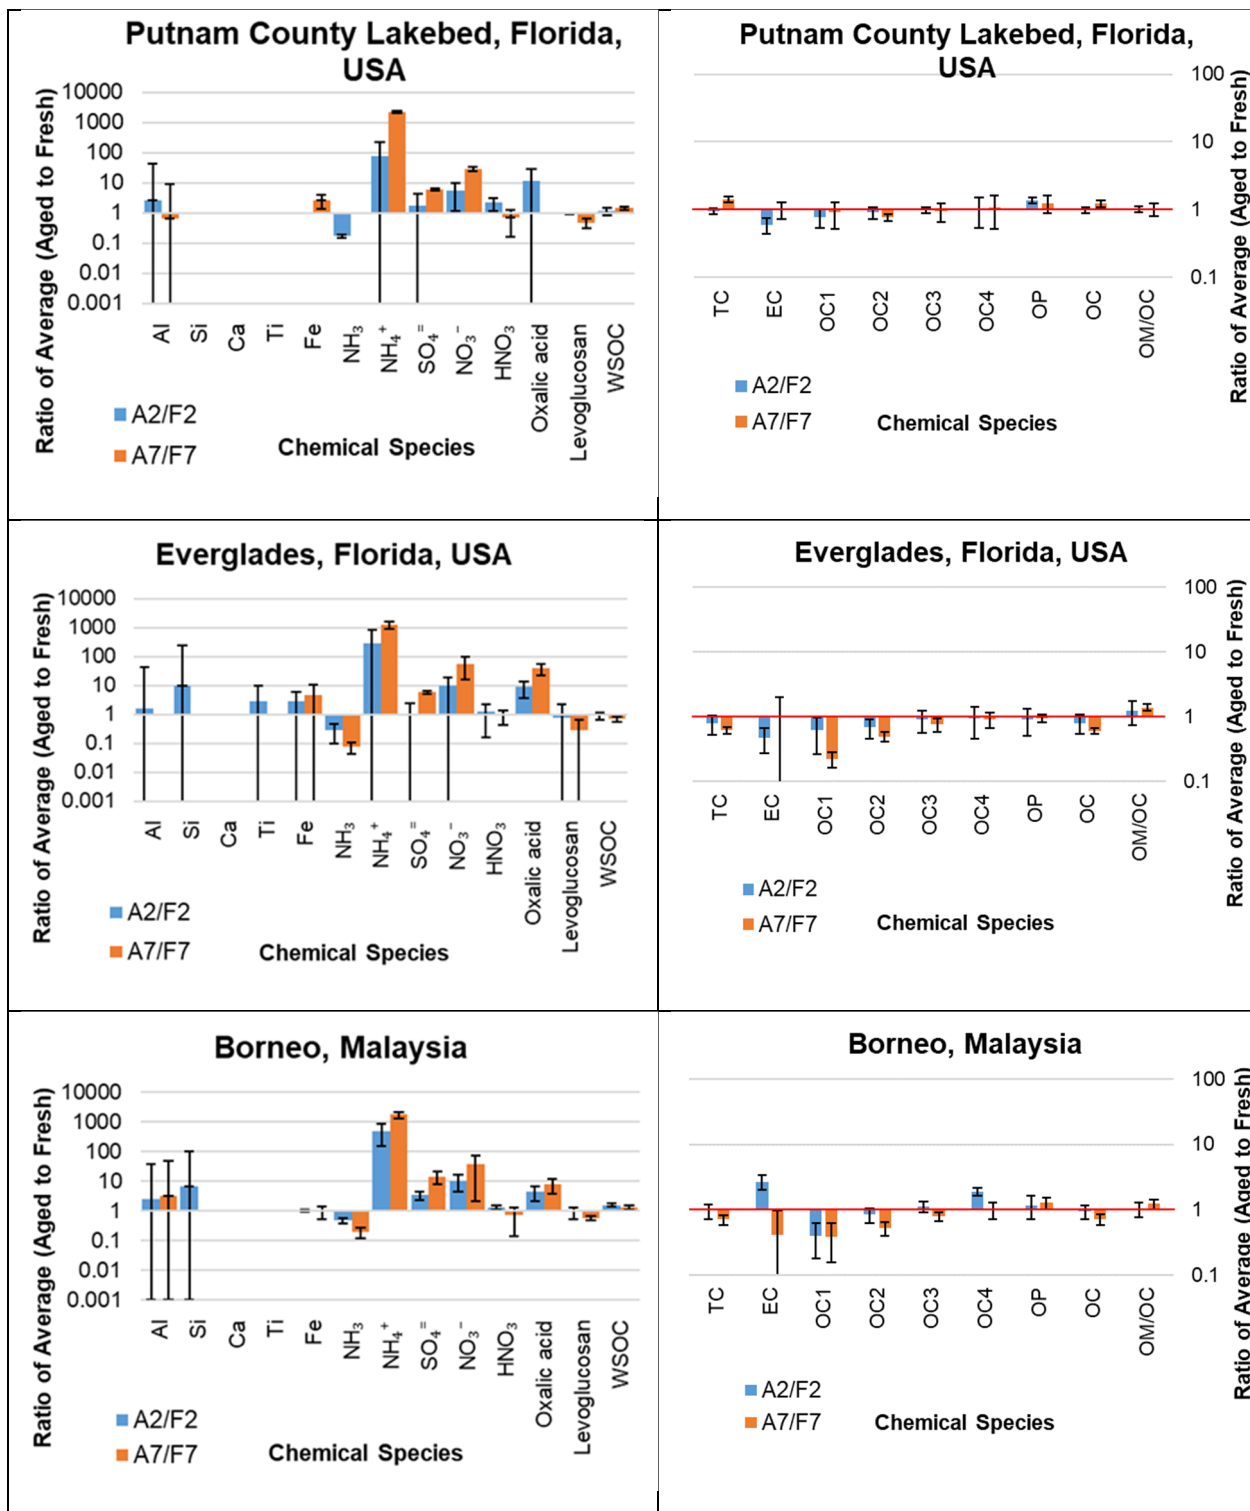

879 Figure 3. Ratios of average Aged (A) to Fresh (F) chemical species for 2-days (A2/F2) and 7-days  
 880 (A7/F7) of atmospheric aging of six types of peats. Vertical bars represent the standard deviations  
 881 associated with each ratio. Note that different scales were used in the two Y axes, with 0.001 to  
 882 10,000 on the left axis and 0.1 to 100 on the right axis (species abbreviations are shown in Fig. 1;  
 883 OM is organic mass).  
 884

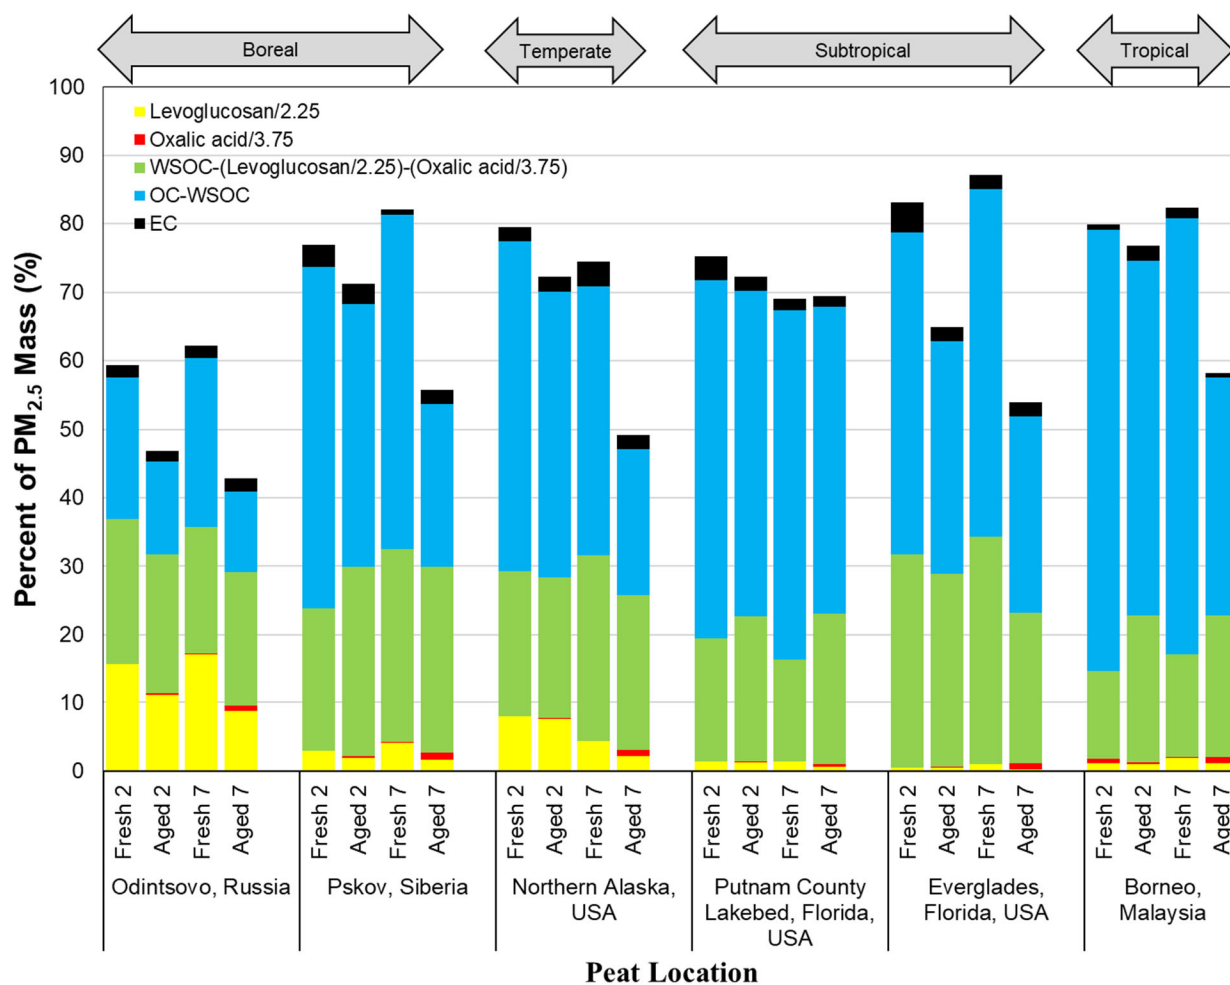

885

886 Figure 4. Abundances of fresh and aged carbon-containing components in PM<sub>2.5</sub> (levoglucosan  
 887 [C<sub>6</sub>H<sub>10</sub>O<sub>5</sub>] is divided by 2.25 and oxalic acid [C<sub>2</sub>H<sub>2</sub>O<sub>4</sub>] is divided by 3.75 to obtain the carbon  
 888 content. These levels are subtracted from the water-soluble organic carbon [WSOC] to obtain the  
 889 remainder, and WSOC is subtracted from organic carbon [OC] to obtain non-soluble carbon.  
 890 Elemental carbon [EC] is unaltered).  
 891

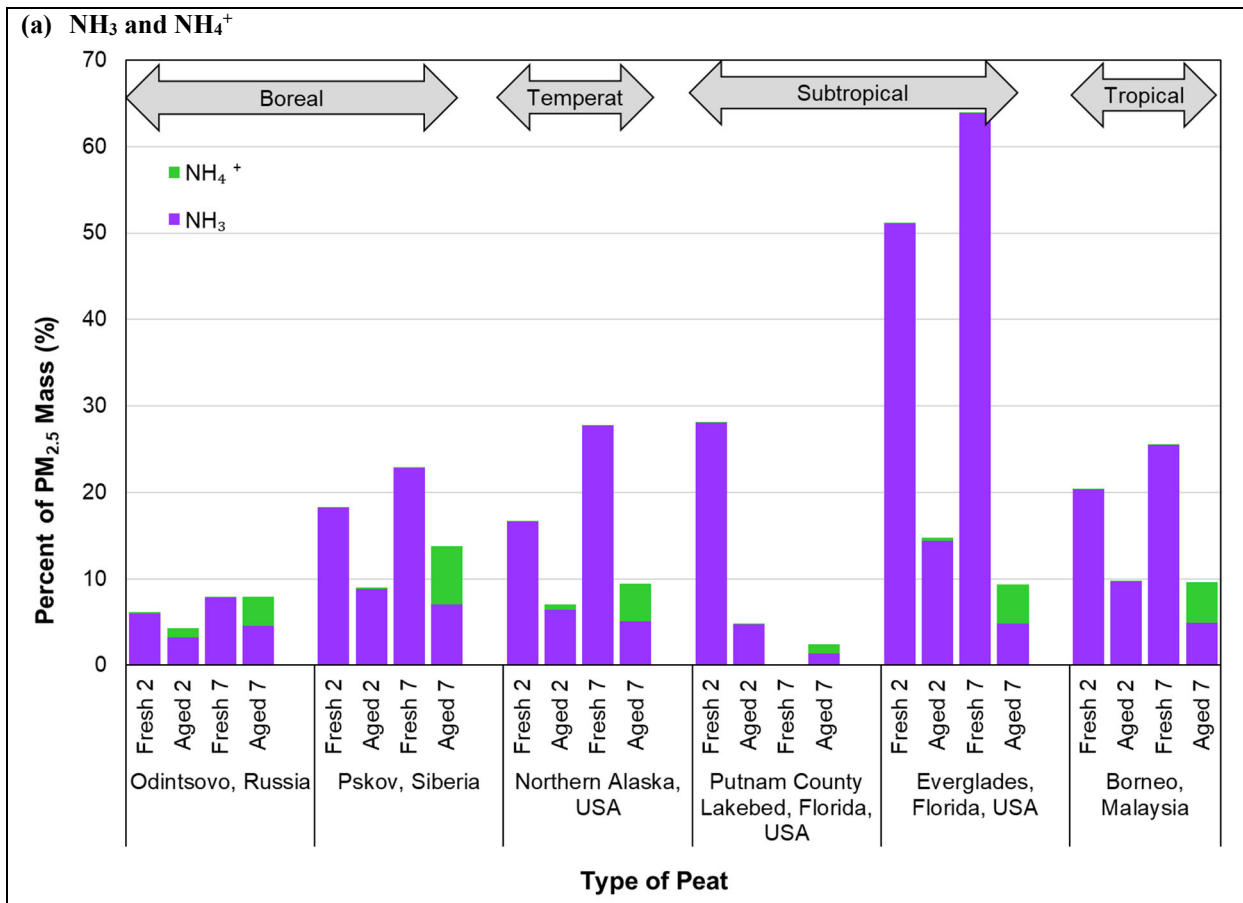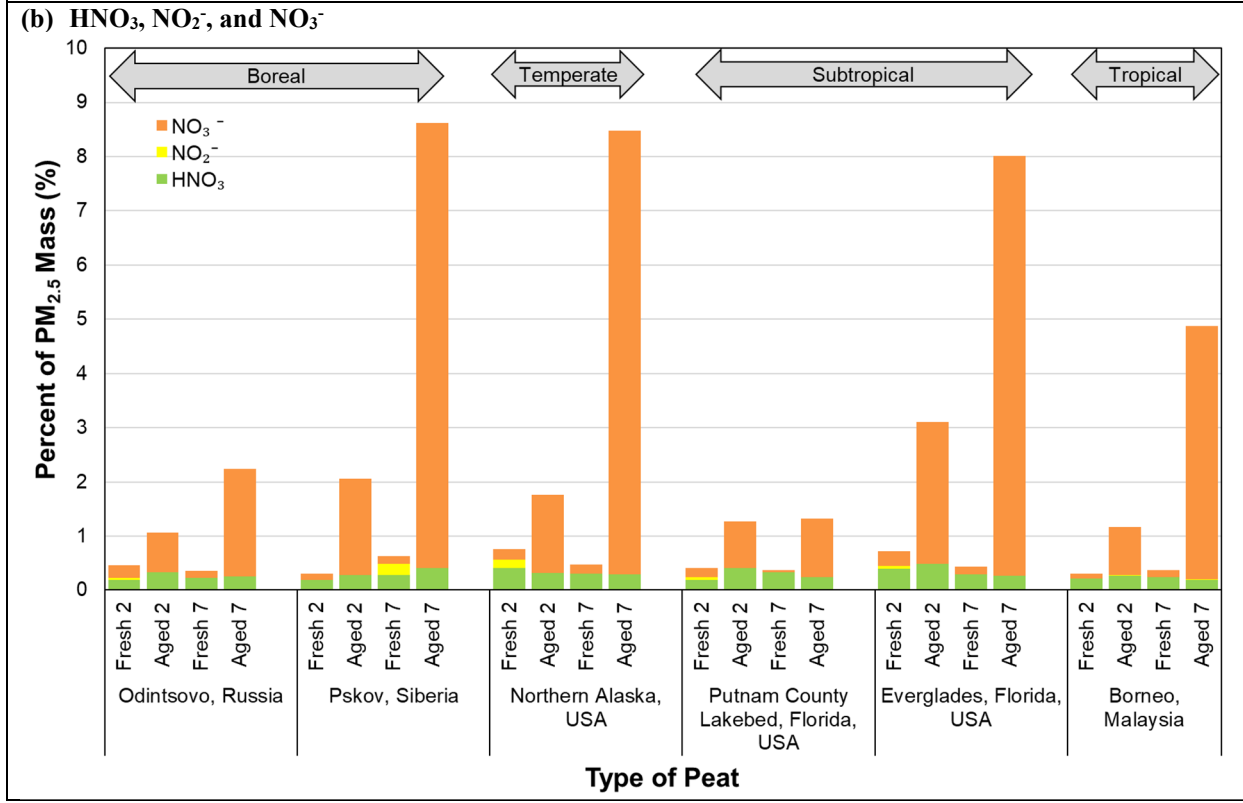

892 Figure 5. Comparison of nitrogen species for: a)  $\text{NH}_3$  and  $\text{NH}_4^+$ ; and b)  $\text{HNO}_3$ ,  $\text{NO}_2^-$ , and  $\text{NO}_3^-$   
893 between fresh and aged profiles for six types of peats.  
894

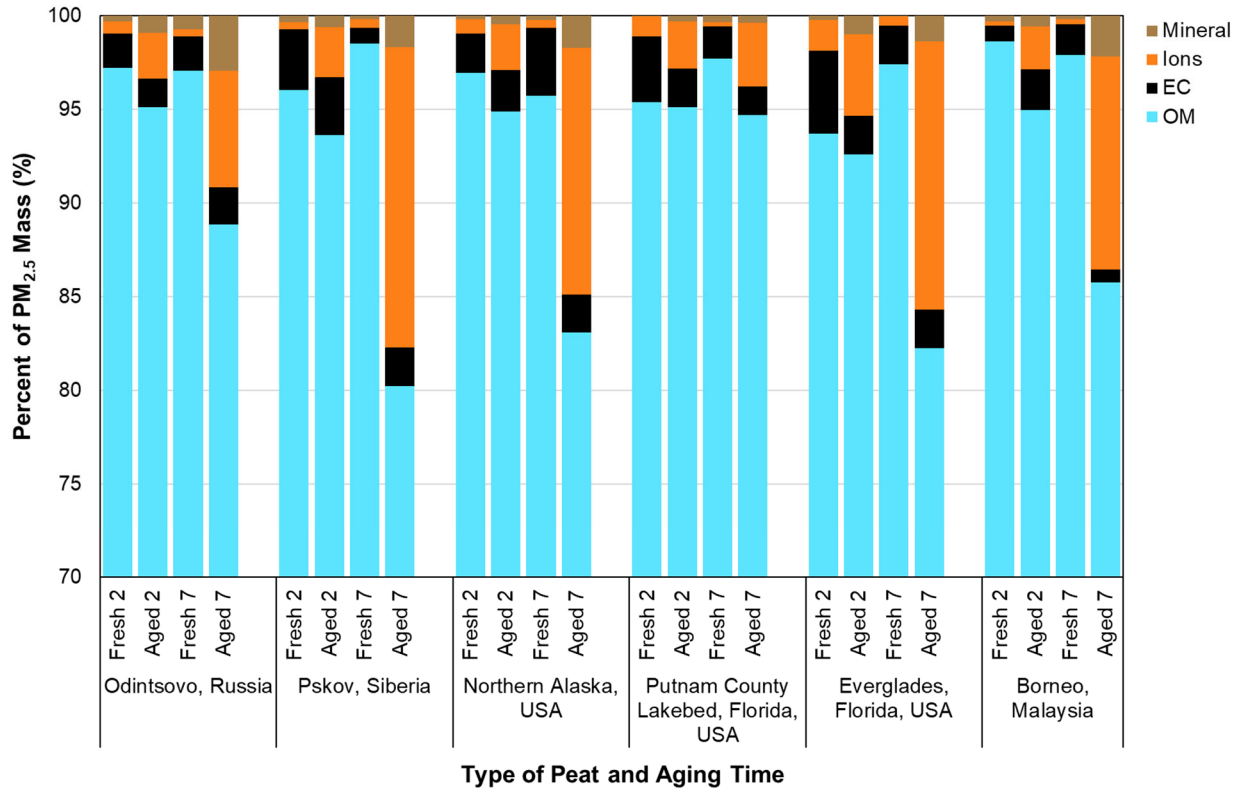

895  
 896 Figure 6. Reconstruction of PM<sub>2.5</sub> mass with organic mass (OM, see Table 3 for OM/OC ratios),  
 897 elemental carbon (EC), major ions (i.e., sum of NH<sub>4</sub><sup>+</sup>, NO<sub>3</sub><sup>-</sup>, and SO<sub>4</sub><sup>-</sup>), and mineral component  
 898 (=2.2 Al + 2.49 Si + 1.63 Ca + 1.94 Ti + 2.42 Fe) for six types of peat between fresh and aged  
 899 profiles.
