# Supplementary material for: Changes in PM 2.5 Peat Combustion Source Profiles with Atmospheric Aging in an Oxidation Flow Reactor
Source: Copernicus journal article supplement (doi:10.5194/amt-2019-198), 2019-05-29
Supplement: Supplementary file [file amt-2019-198-AC1-supplement.zip]

# Supplemental Information

## Changes in PM<sub>2.5</sub> Peat Combustion Source Profiles with Atmospheric Aging in an Oxidation Flow Reactor

Judith C. Chow<sup>1,2\*</sup>, Junji Cao<sup>2,3</sup>, L.-W. Antony Chen<sup>4</sup>, Xiaoliang Wang<sup>1</sup>, Qiyuan Wang<sup>2,3</sup>, Jie Tian<sup>2,3</sup>, Steven Sai Hang Ho<sup>1,5</sup>, Adam C. Watts<sup>1</sup>, Tessa B. Carlson<sup>1</sup>, Steven D. Kohl<sup>1</sup>, John G. Watson<sup>1,2</sup>

<sup>1</sup>Division of Atmospheric Sciences, Desert Research Institute, Reno, Nevada, USA

<sup>2</sup>Key Laboratory of Aerosol Chemistry and Physics, Institute of Earth Environment, Chinese Academy of Sciences, Xi'an, 710061, China.

<sup>3</sup>CAS Center for Excellence in Quaternary Science and Global Change, Xi'an, 710061, China

<sup>4</sup>Department of Environmental and Occupational Health, University of Nevada, Las Vegas, Nevada, USA

<sup>5</sup>Hong Kong Premium Services and Research Laboratory, Hong Kong, China

Revised and resubmitted to  
Atmospheric Measurement Techniques Discussion

Date

19 August 2019

\*Corresponding Author: [judith.chow@dri.edu](mailto:judith.chow@dri.edu)

## S.1 Experimental Details and Oxidation Flow Reactor Operation

Oxidation Flow Reactors (OFRs) intend to simulate photochemical changes in gas and particle mixtures as they age during atmospheric transport. This is accomplished by directing fresh emissions through a chamber that is illuminated with ultraviolet (UV) light to simulate the Sun's illumination of the mixture. OFRs differ from smog chambers in that the UV radiation is more intense and there is a continuous flow through the system, rather than the stagnant mixture that is examined in the smog chamber at UV levels closer to ambient levels (Hidy, 2019; Lee et al., 2009). Various OFR systems have been developed and applied (Aerodyne, 2019; Bin Babar et al., 2017; Cazorla and Brune, 2010; Ezell et al., 2010; Huang et al., 2017; Karjalainen et al., 2016; Lambe et al., 2011; Mitroo et al., 2018; Pourkhesalian et al., 2015; Reece et al., 2017; Smith et al., 2009) since the original Teflon bag of Kang et al. (2007) that was externally illuminated with mercury vapor lamps. These units range in volume from 0.15 L (Keller and Burtscher, 2012) to 1200 L (Ezell et al., 2010) and are made from fluorinated ethylene propylene (FEP) Teflon films, stainless steel, quartz or Iridite/Anodine coated aluminum with the intent to minimize reactions with the chamber walls. Although many published articles reference the characterization and operational details of Kang et al. (2007), it is evident that there have been many changes since their initial development.

Important OFR design parameters are (Huang et al., 2017): 1) gas introduction mixing prior to and within the OFR chamber; 2) chamber volume and range of flow rates that determine residence time within the chamber; 3) reaction chamber materials that minimize artifacts (e.g., reactant adsorption and outgassing); and 4) sensors applied to detect the types of reactants and end-products. General findings are: 1) larger diameters and shorter residence times minimize gas and particle losses to chamber surfaces; 2) rapid mixing of pollutants provides more accurate reaction rate measurements; and 3) passivated conductive surfaces minimize electrostatic effects on particles. Although the Caltech Photooxidation Flow Tube reactor (Huang et al., 2017) appears to be the best characterized via modeling and experiment, the Aerodyne (2019) potential aerosol mass (PAM)-OFR is in more widespread use owing to its compactness, reliability, expanding user-base (PAMWiki, 2019), and commercial availability. The Aerodyne OFR was used for the experiments reported here.

Figure S1 illustrates the configuration for these experiments. Two tubular low-pressure mercury (Hg) lamps in the OFR with Teflon sleeves provided UV light at 185 and 254 nm wavelengths (BHK, 2019) and two lamps with doped quartz sleeves provided illumination at 254 nm. Lamps were cooled by a continuous flow of relatively inert, nitrogen (N<sub>2</sub>) gas. The main reactions for this OFR185 mode that create O<sub>3</sub>, OH (hydroxyl radical), and HO<sub>2</sub> (hydroperoxyl radical) oxidants are:

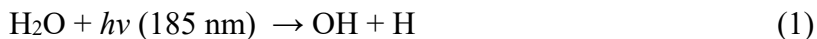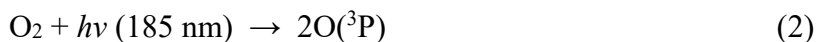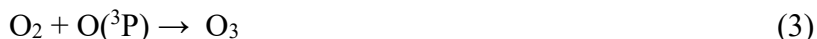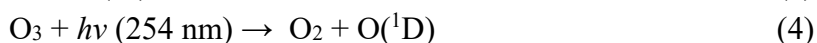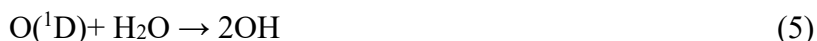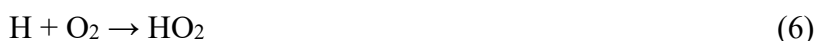

The OH is most influential in photochemical aging, and OH production within the OFR is related to the Hg lamp intensity, which in turn is related to the voltages applied to the lamps.

Bhattacharai et al. (2018) demonstrate that UV fluxes are almost linearly associated with lamp voltage from 2 to 7 V, and similar linear results were found for the profile aging tests reported here (Cao et al., 2019). OH production is related to lamp intensity by inference from first order reactions of OH with SO<sub>2</sub> which has a well-characterized rate constant ( $k_{\text{SO}_2, \text{OH}} = 9.49 \times 10^{-13} \text{ cm}^3 \text{ molecule}^{-1} \text{ sec}^{-1}$  at 1 atm and 298 °K) (Davis et al., 1979; Sander et al., 2006) by the relationship:

$$\text{OH} = -1/k_{\text{SO}_2, \text{OH}} \ln (\text{C}_{\text{SO}_2, \text{out}}/\text{C}_{\text{SO}_2, \text{in}}) \quad (7)$$

where

$k_{\text{SO}_2, \text{OH}}$  = reaction rate of SO<sub>2</sub> with OH ( $\text{cm}^3 \text{ molecule}^{-1} \text{ sec}^{-1}$ )

$\text{C}_{\text{SO}_2, \text{in}}$  = SO<sub>2</sub> concentration injected into the OFR (ppb)

$\text{C}_{\text{SO}_2, \text{out}}$  = SO<sub>2</sub> concentration at the OFR outlet (ppb)

UV lamps were operated at 2 and 3.5 volts with a flow rate of 10 L min<sup>-1</sup> and a plug-flow residence time of ~80 s in the 13.3 L anodine-coated reactor, which translates to OH exposures ( $\text{OH}_{\text{exp}}$ ) of  $\sim 2.6 \times 10^{11}$  and  $8.8 \times 10^{11}$  molecules-sec cm<sup>-3</sup> at 2 volts and 3.5 volts, respectively. These values for  $\text{OH}_{\text{exp}}$  are within the range of  $1 \times 10^{10}$  to  $\sim 2 \times 10^{12}$  molecules-sec cm<sup>-3</sup> reported in other OFR experiments. The lamps were powered and brought into steady state operations before drawing the sample stream through the OFR

The Aerodyne OFR surface-to-volume ratio is 0.24 cm<sup>-1</sup>, which is larger than many of the other OFR types and is intended to minimize particle and gas losses with lamp off. SO<sub>2</sub> concentrations measured ranging from 100 to 800 ppb at the OFR inlet showed less than 1% changes when measured at the OFR outlet. Similar results were found for carbon monoxide (CO) and ozone (O<sub>3</sub>), indicating minimal losses to the reactor surfaces. This is in contrast to the Teflon bag of Kang et al. (2007) that experienced SO<sub>2</sub> losses as high as 20%. Lambe et al. (2011) found transmission efficiencies of  $0.91 \pm 0.09$  for CO<sub>2</sub> and  $1.2 \pm 0.4$  for SO<sub>2</sub> with a later quartz glass OFR design.

Lambe et al. (2011) found particle transmission efficiencies exceeding 80% for mobility diameters >150 nm, but as low as 40% for 50 nm particles with a quartz OFR. Karjalainen et al. (2016) measured 60% particle losses for ~20 nm particles, ~25% particle losses for 50 nm particles, and <10% losses for particle sizes >100 nm with a stainless steel OFR. Palm et al. (2016) compared mass concentrations in ambient air within a forest with the same air drawn through an Aerodyne OFR and transfer lines, finding only a 4% particle loss. Bhattacharai et al. (2018) found similar results for ammonium sulfate ((NH<sub>4</sub>)<sub>2</sub>SO<sub>4</sub>) particles, with 50% transmission for 20 nm particles and >90% transmission for particles >100 nm.

For this study, UV lamp stability and linearity was determined by moving a TOCON\_C6 photodiode (Sglux GmbH, Germany) detector along the central axis of the OFR and recording its readings as function of the voltage supplied to the lamps, verifying that the UV flux was linearly associated with lamp voltage from 2 to 7 V, but it was undetectable for UV <1.5V and leveled off at ~350 μW cm<sup>-2</sup> in the range of 7-10 V. Experiments were limited to 2 and 3.5 V which is well-within the linear range. Irradiation fluxes were  $2.5 \times 10^{13}$  photons cm<sup>-2</sup> s<sup>-1</sup> at 2 V and  $12.5 \times 10^{13}$  photons cm<sup>-2</sup> s<sup>-1</sup> at 3.5 V. Fluxes were constant both in time and along the OFR axis, indicating that consistent oxidant amounts can be produced for a given voltage within the linear range, similar

to the findings of Bhattarai et al. (2018). Periodic performance tests of light intensity should be made over time as there may be some deterioration of lamp performance with use, and the measurements need to be repeated when lamps are replaced.

Since high O<sub>3</sub> concentrations were generated when UV lamps were on, a potassium iodide (KI) denuder (1/3 KI with 2/3 silica) was installed at the outlet of the reactor to remove over 99.99% of the O<sub>3</sub> and maintain a stable baseline of < 20 ppb. This possibly compromised some of the potassium ion measurement in the aged profiles.

As discussed in the main text, the biggest uncertainty is not the estimation of oxidant exposure in the OFR, but the conversion of this exposure to atmospheric aging times. Changes in the atmospheric multipollutant environment as emissions from several sources mix in the atmosphere are not represented within the OFR. Added to this are the unknown effects of the high oxidant exposures within the OFR relative to atmospheric exposures and the wide variability of atmospheric OH from the assumed  $1.5 \times 10^6$  molecules cm<sup>-3</sup> which is commonly, but not universally, used to translate OH exposure to atmospheric aging.

## Supplemental References

- Aerodyne: Potential Aerosol Mass (PAM) oxidation flow reactor, Aerodyne Research Inc., Billerica, MA, 2019. <http://www.aerodyne.com/sites/default/files/u17/PAM%20Potential%20Aerosol%20Mass%20Reactor.pdf>
- Bhattacharai, C., Samburova, V., Sengupta, D., Iaukea-Lum, M., Watts, A. C., Moosmuller, H., and Khlystov, A. Y.: Physical and chemical characterization of aerosol in fresh and aged emissions from open combustion of biomass fuels, *Aerosol Sci. Technol.*, 52, 1266-1282, 2018.
- BHK: Products: Mercury lamps, BHK Inc., Ontario, CA, 2019. <http://www.bhkinc.com/index.cfm?action=products>
- Bin Babar, Z., Park, J. H., and Lim, H. J.: Influence of NH<sub>3</sub> on secondary organic aerosols from the ozonolysis and photooxidation of alpha-pinene in a flow reactor, *Atmos. Environ.*, 164, 71-84, 2017.
- Cao, J. J., Wang, Q. Y., Tan, J., Zhang, Y. G., Wang, W. J., Zhong, B. L., Ho, S. S. H., Chen, L.-W. A., Wang, X. L., Watson, J. G., and Chow, J. C.: Evaluation of the oxidation flow reactor for particulate matter emission limit certification, *Atmos. Environ.*, 2019. submitted, 2019.
- Cazorla, M. and Brune, W. H.: Measurement of ozone production sensor, *Atmos. Meas. Tech.*, 3, 545-555, 2010.
- Davis, D. D., Ravishankara, A. R., and Fischer, S.: SO<sub>2</sub> oxidation via the hydroxyl radical-Atmospheric fate of HSO<sub>x</sub> radicals, *Geophysical Research Letters*, 6, 113-116, 1979.
- Ezell, M. J., Johnson, S. N., Yu, Y., Perraud, V., Bruns, E. A., Alexander, M. L., Zelenyuk, A., Dabdub, D., and Finlayson-Pitts, B. J.: A new aerosol flow system for photochemical and thermal studies of tropospheric aerosols, *Aerosol Sci. Technol.*, 44, 329-338, 2010.
- Hidy, G. M.: Atmospheric chemistry in a box or a bag, *Atmosphere*, 10, 1-36, 2019.
- Huang, Y., Coggon, M. M., Zhao, R., Lignell, H., Bauer, M. U., Flagan, R. C., and Seinfeld, J. H.: The Caltech Photooxidation Flow Tube reactor: Design, fluid dynamics and characterization, *Atmos. Meas. Tech.*, 10, 839-867, 2017.
- Kang, E., Root, M. J., Toohey, D. W., and Brune, W. H.: Introducing the concept of Potential Aerosol Mass (PAM), *Atmos. Chem. Phys.*, 7, 5727-5744, 2007.
- Karjalainen, P., Timonen, H., Saukko, E., Kuuluvainen, H., Saarikoski, S., Aakko-Saksa, P., Murtonen, T., Bloss, M., Dal Maso, M., Simonen, P., Ahlberg, E., Svenningsson, B., Brune, W. H., Hillamo, R., Keskinen, J., and Ronkko, T.: Time-resolved characterization of primary particle emissions and secondary particle formation from a modern gasoline passenger car, *Atmos. Chem. Phys.*, 16, 8559-8570, 2016.
- Keller, A. and Bartscher, H.: A continuous photo-oxidation flow reactor for a defined measurement of the SOA formation potential of wood burning emissions, *J. Aerosol Sci.*, 49, 9-20, 2012.
- Lambe, A. T., Ahern, A. T., Williams, L. R., Slowik, J. G., Wong, J. P. S., Abbatt, J. P. D., Brune, W. H., Ng, N. L., Wright, J. P., Croasdale, D. R., Worsnop, D. R., Davidovits, P., and Onasch, T. B.: Characterization of aerosol photooxidation flow reactors: heterogeneous oxidation, secondary organic aerosol formation and cloud condensation nuclei activity measurements, *Atmos. Meas. Tech.*, 4, 445-461, 2011.
- Lee, S. B., Bae, G. N., and Moon, K. C.: Smog chamber measurements. In: *Atmospheric and Biological Environmental Monitoring*, Kim, Y. J., Platt, U., Gu, M. B., and Iwahashi, H. (Eds.), Springer, Dordrecht, Netherlands, 2009.
- Mitroo, D., Sun, Y. J., Combest, D. P., Kumar, P., and Williams, B. J.: Assessing the degree of plug flow in oxidation flow reactors (OFRs): a study on a potential aerosol mass (PAM) reactor, *Atmos. Meas. Tech.*, 11, 1741-1756, 2018.
- PAMWiki: PAMWiki, 2019. <https://sites.google.com/site/pamwiki/>
- Pourkhesalian, A. M., Stevanovic, S., Rahman, M. M., Faghihi, E. M., Bottle, S. E., Masri, A. R., Brown, R. J., and Ristovski, Z. D.: Effect of atmospheric aging on volatility and reactive oxygen species of biodiesel exhaust nanoparticles, *Atmos. Chem. Phys.*, 15, 9099-9108, 2015.
- Reece, S. M., Sinha, A., and Grieshop, A. P.: Primary and photochemically aged aerosol emissions from biomass cookstoves: Chemical and physical characterization, *Environ. Sci. Technol.*, 51, 9379-9390, 2017.
- Sander, S. P., Friedl, R. R., Ravishankara, A. R., Golden, D. M., Kolb, C. E., Kurylo, M. J., Molina, M. J., Moortgat, G. K., Finlayson-Pitts, B. J., Wine, P. H., R.E., H., and Orkin, V. L.: Chemical kinetics and photochemical data for use in atmospheric studies: Evaluation Number 15, Jet Propulsion Laboratory, Pasadena, CA, 2006. [https://jpldataeval.jpl.nasa.gov/pdf/JPL\\_15\\_AllInOne.pdf](https://jpldataeval.jpl.nasa.gov/pdf/JPL_15_AllInOne.pdf)
- Smith, J. D., Kroll, J. H., Cappa, C. D., Che, D. L., Liu, C. L., Ahmed, M., Leone, S. R., Worsnop, D. R., and Wilson, K. R.: The heterogeneous reaction of hydroxyl radicals with sub-micron squalane particles: a model system for understanding the oxidative aging of ambient aerosols, *Atmos. Chem. Phys.*, 9, 3209-3222, 2009.

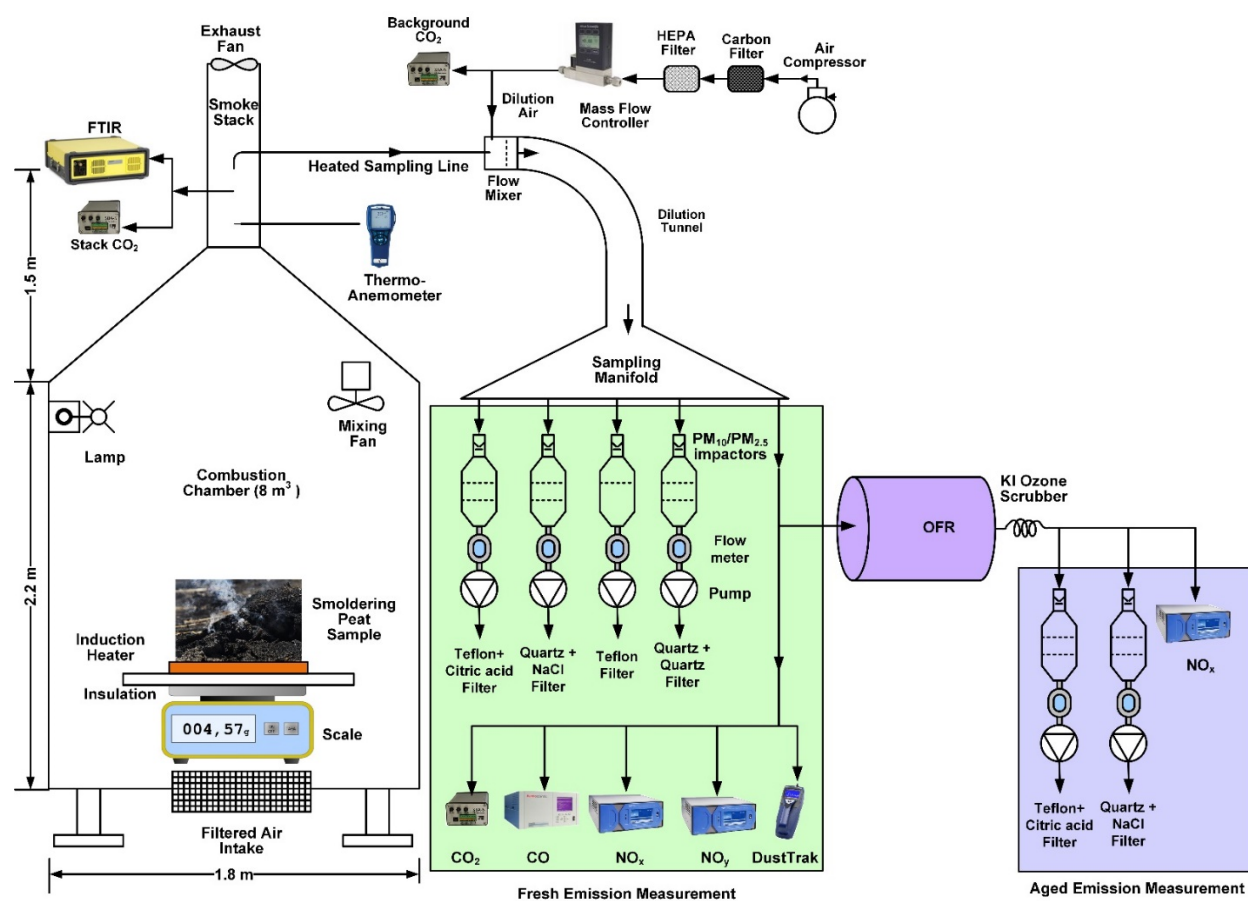

Figure S1. Configuration of peat combustion experimental set up. (FTIR: Fourier-transform infrared spectrometer; OFR: oxidation flow reactor; OFR lamps were operated at 2 and 3.5 volts to simulate aging of ~2 and 7 days, respectively) (Watson et al., 2019).

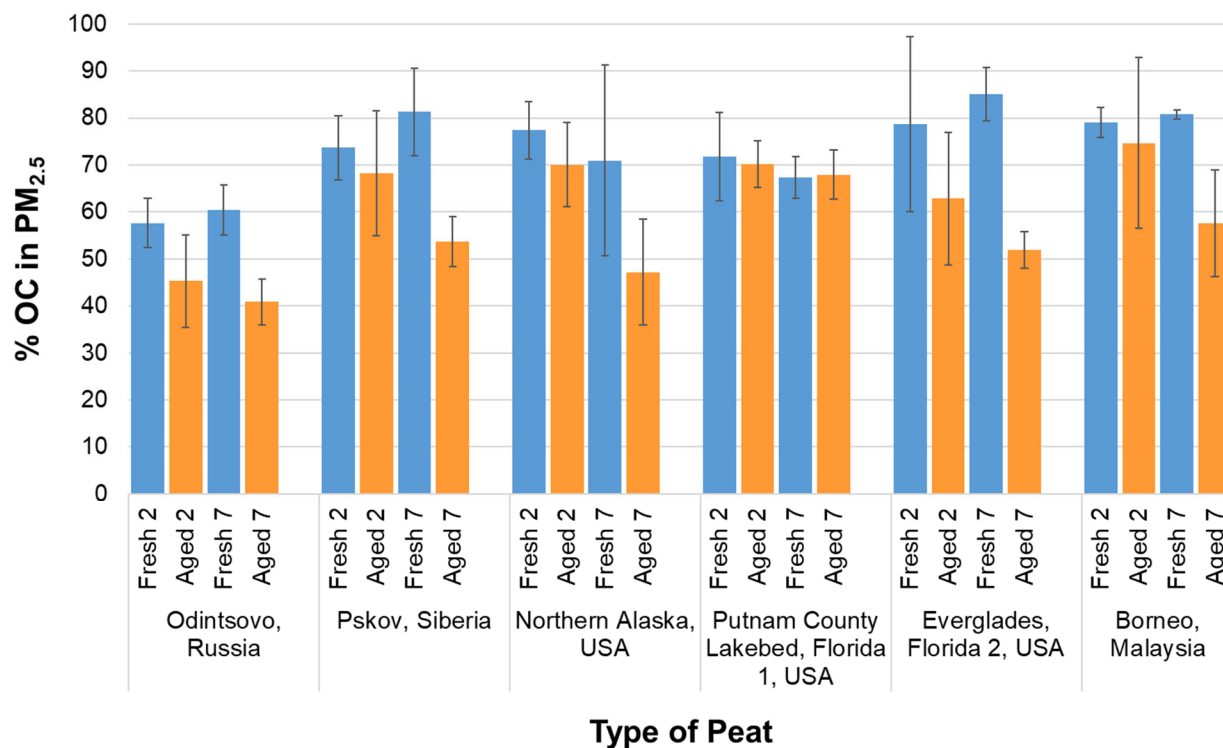

Figure S2. Comparison of OC abundances in PM<sub>2.5</sub> between the fresh and aged source profiles. Further reduction of OC abundances in PM<sub>2.5</sub> (~7–22%) from 2- to 7-days of aging are found for all but Putnam (FL1) peat profiles (Fresh 2 vs. Aged 2 and Fresh 7 vs. Aged 7 represent the comparison of 2- and 7-days of atmospheric aging, respectively).

a)

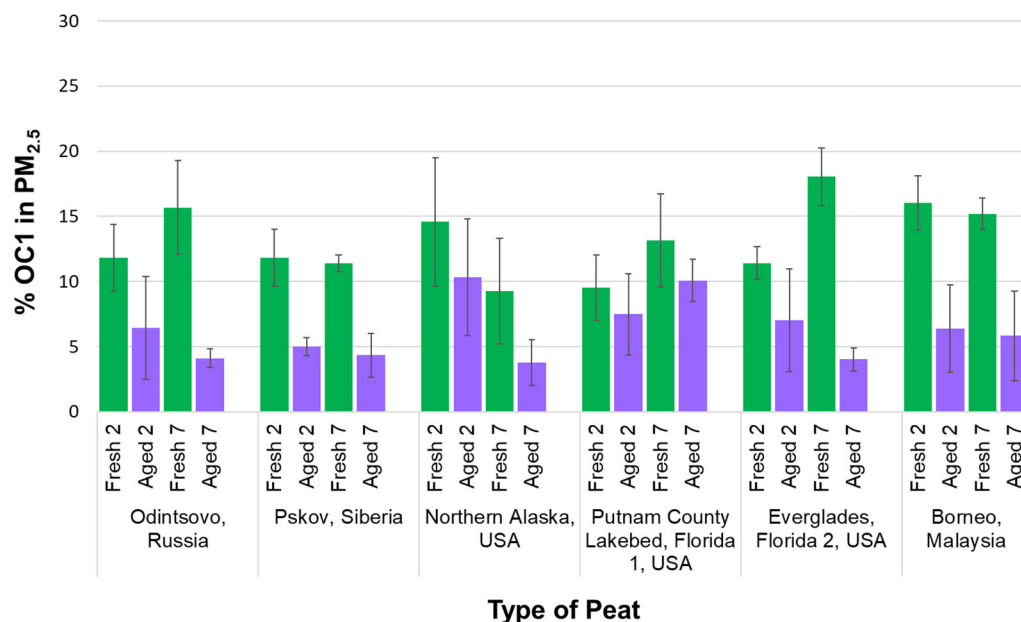

b)

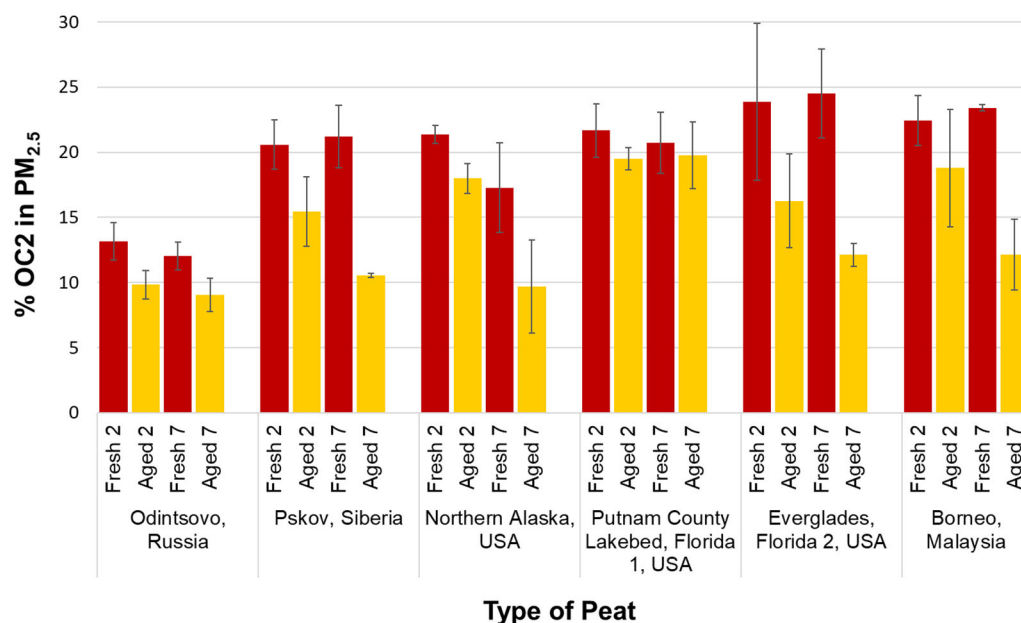

Figure S3. Reduction of low temperature OC1 (a) and OC2 (b) after 2- and 7-days of atmospheric aging. The OC1 and OC2 are carbon fractions thermally evolved at 140 and 280 °C in a helium atmosphere following IMPROVE-A thermal/optical reflectance protocol (Chow et al, 2007) that are applied in U.S. long term IMPROVE network and Chemical Speciation Network (CSN). (Fresh 2 vs. Aged 2 and Fresh 7 vs. Aged 7 represent the comparison of 2- and 7-days of atmospheric aging, respectively).



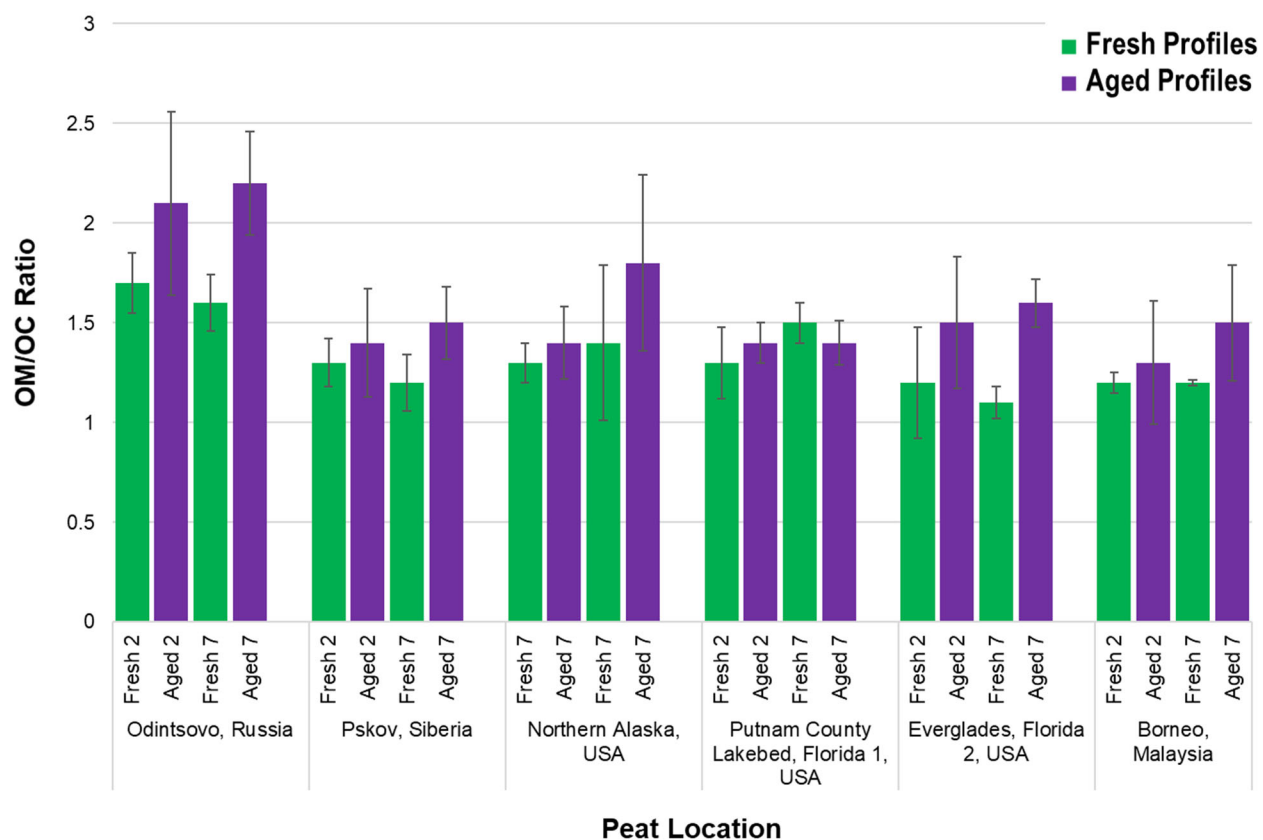

Figure S4. The OM/OC ratios between fresh and aged aerosol (Fresh 2 vs. Aged 2 and Fresh 7 vs. Aged 7 represent the comparison of 2- and 7-days of atmospheric aging, respectively).

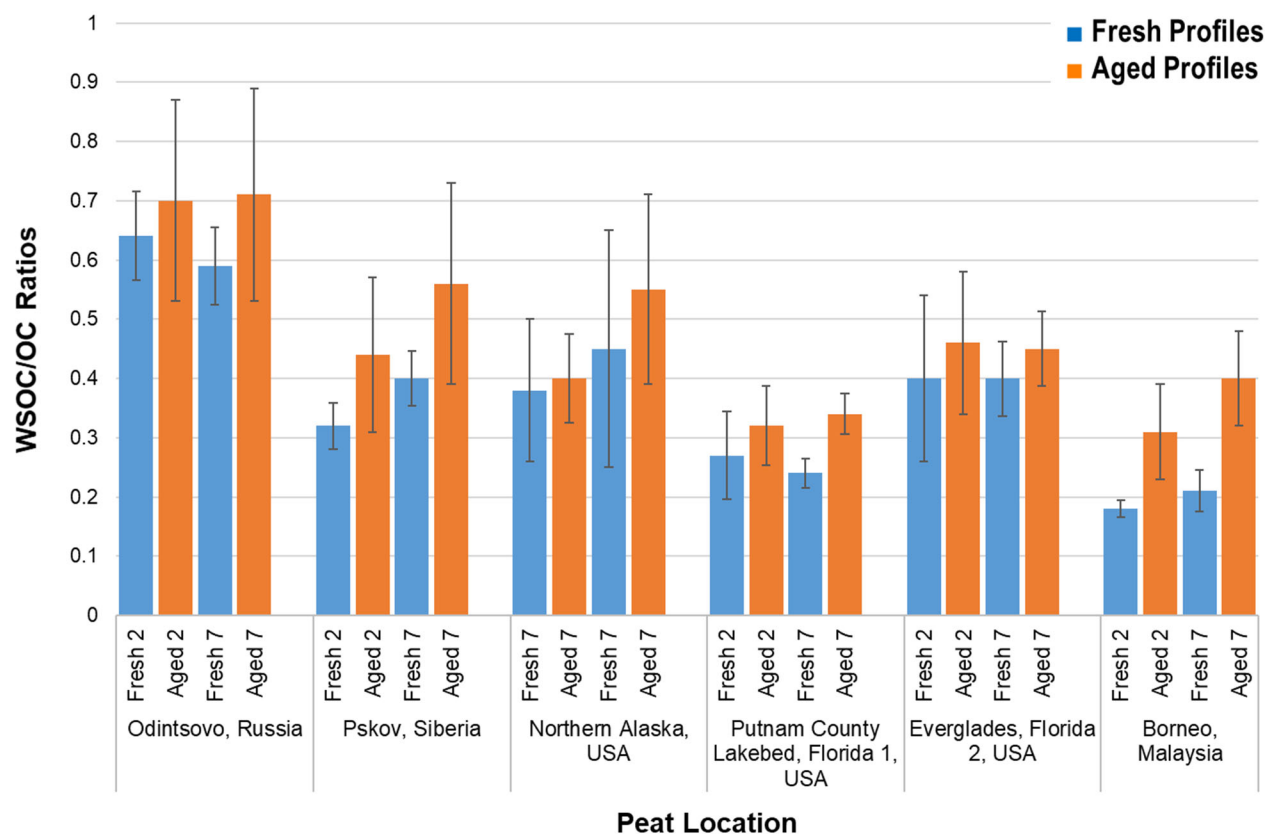

Figure S5. Ratios of water-soluble organic carbon (WSOC) OC between fresh and aged peat profiles (Fresh 2 vs. Aged 2 and Fresh 7 vs. Aged 7 represent the comparison of 2- and 7-days of atmospheric aging, respectively).

Table S1

## Operational parameters for the 40 peat combustion tests

| Peat Type                                             | Peat ID              | Voltage <sup>a</sup><br>(V) | Aging<br>Time<br>(days) | Reactor<br>Relative<br>Humidity<br>(%) | Dilution<br>Ratio | Modified<br>Combustion<br>Efficiency<br>(MCE) | Peat Dry<br>Mass<br>before<br>Burn (g) | Peat Dry<br>Mass<br>after<br>Burn (g) | Sampling<br>Duration<br>(minutes) | Fresh<br>Loading µg<br>per filter | Aged<br>Loading µg<br>per filter | Ratio<br>Aged/Fresh ±<br>Std Dev | Fresh <sup>b</sup><br>PM <sub>2.5</sub> Mass<br>µg m <sup>-3</sup> | Aged <sup>b</sup><br>PM <sub>2.5</sub> Mass<br>µg m <sup>-3</sup> |
|-------------------------------------------------------|----------------------|-----------------------------|-------------------------|----------------------------------------|-------------------|-----------------------------------------------|----------------------------------------|---------------------------------------|-----------------------------------|-----------------------------------|----------------------------------|----------------------------------|--------------------------------------------------------------------|-------------------------------------------------------------------|
| Odintsovo,<br>Russia                                  | PEAT030              | 2                           | 2                       | 35                                     | 3.13              | 0.76                                          | 16.0                                   | 1.0                                   | 44                                | 361.00                            | 319.00                           | 0.88 ± 0.019                     | 1640.91                                                            | 1450.00                                                           |
|                                                       | PEAT031              | 2                           | 2                       | 35                                     | 3.22              | 0.81                                          | 15.4                                   | 1.0                                   | 40                                | 388.00                            | 304.00                           | 0.78 ± 0.017                     | 1940.00                                                            | 1520.00                                                           |
|                                                       | PEAT032              | 2                           | 2                       | 35                                     | 3.22              | 0.84                                          | 15.1                                   | 1.0                                   | 39                                | 415.00                            | 444.00                           | 1.07 ± 0.018                     | 2128.21                                                            | 2276.92                                                           |
|                                                       | PEAT033              | 3.5                         | 7                       | 30                                     | 3.33              | 0.82                                          | 15.1                                   | 0.9                                   | 45                                | 361.00                            | 427.00                           | 1.18 ± 0.022                     | 1604.44                                                            | 1897.78                                                           |
|                                                       | PEAT034              | 3.5                         | 7                       | 26                                     | 2.94              | 0.79                                          | 15.7                                   | 0.7                                   | 41                                | 464.00                            | 417.00                           | 0.90 ± 0.015                     | 2263.41                                                            | 2034.15                                                           |
|                                                       | PEAT035              | 3.5                         | 7                       | 30                                     | 2.95              | 0.84                                          | 15.2                                   | 0.8                                   | 40                                | 319.00                            | 286.00                           | 0.90 ± 0.022                     | 1595.00                                                            | 1430.00                                                           |
| Pskov, Siberia                                        | PEAT023              | 2                           | 2                       | 20                                     | 5.03              | 0.84                                          | 47.1                                   | 1.9                                   | 67                                | 558.00                            | 557.00                           | 1.00 ± 0.031                     | 1665.67                                                            | 1662.69                                                           |
|                                                       | PEAT025              | 2                           | 2                       | 55                                     | 4.71              | 0.85                                          | 25.8                                   | 1.0                                   | 70                                | NA <sup>d</sup>                   | 257.00                           | NA <sup>d</sup>                  | NA <sup>d</sup>                                                    | 734.29                                                            |
|                                                       | PEAT026              | 2                           | 2                       | 40                                     | 4.68              | 0.84                                          | 26.5                                   | 1.0                                   | 61                                | 302.00                            | 187.00                           | 0.62 ± 0.0062                    | 990.16                                                             | 613.11                                                            |
|                                                       | PEAT027              | 3.5                         | 7                       | 40                                     | 4.68              | 0.87                                          | 25.6                                   | 1.0                                   | 52                                | 206.00                            | 142.00                           | 0.69 ± 0.031                     | 792.31                                                             | 546.15                                                            |
|                                                       | PEAT028              | 3.5                         | 7                       | 50                                     | 4.72              | 0.83                                          | 25.7                                   | 1.1                                   | 57                                | 384.00                            | 411.00                           | 1.07 ± 0.019                     | 1347.37                                                            | 1442.11                                                           |
|                                                       | PEAT029              | 3.5                         | 7                       | 35                                     | 4.74              | 0.85                                          | 26.1                                   | 1.1                                   | 68                                | 256.00                            | 304.00                           | 1.19 ± 0.032                     | 752.94                                                             | 894.12                                                            |
| Northern Alaska,<br>USA                               | PEAT013              | 2                           | 2                       | 30                                     | 4.78              | 0.84                                          | 58.2                                   | 13.2                                  | 95                                | 246.00                            | NA <sup>d</sup>                  | NA <sup>d</sup>                  | 517.89                                                             | NA <sup>d</sup>                                                   |
|                                                       | PEAT014              | 2                           | 2                       | 22                                     | 2.88              | 0.84                                          | 34.0                                   | 5.1                                   | 45                                | 476.00                            | 429.00                           | 0.90 ± 0.014                     | 2115.56                                                            | 1906.67                                                           |
|                                                       | PEAT019              | 2                           | 2                       | 30                                     | 2.70              | 0.82                                          | 42.2                                   | 6.8                                   | 72                                | 628.00                            | 659.00                           | 1.05 ± 0.012                     | 1744.44                                                            | 1830.56                                                           |
|                                                       | PEAT020              | 3.5                         | 7                       | 30                                     | 2.69              | 0.85                                          | 39.6                                   | 12.2                                  | 52                                | 437.00                            | 410.00                           | 0.94 ± 0.016                     | 1680.77                                                            | 1576.92                                                           |
|                                                       | PEAT021 <sup>c</sup> | 3.5                         | 7                       | 28                                     | 2.78              | 0.87                                          | 40.7                                   | 13.4                                  | 48                                | 366.00                            | NA <sup>d</sup>                  | NA <sup>d</sup>                  | 1525.00                                                            | NA <sup>d</sup>                                                   |
|                                                       | PEAT022              | 3.5                         | 7                       | 22                                     | 2.77              | 0.87                                          | 38.1                                   | 14.4                                  | 48                                | 187.00                            | 300.00                           | 1.60 ± 0.053                     | 779.17                                                             | 1250.00                                                           |
| Putnam County<br>Lakebed, Florida,<br>USA (FL1)       | PEAT007 <sup>e</sup> | 2                           | 2                       | 40                                     | 5.02              | 0.57                                          | 41.7                                   | 2.5                                   | 84                                | NA <sup>d</sup>                   | NA <sup>d</sup>                  | NA <sup>d</sup>                  | NA <sup>d</sup>                                                    | NA <sup>d</sup>                                                   |
|                                                       | PEAT008              | 2                           | 2                       | 25                                     | 5.02              | 0.65                                          | 40.4                                   | 1.8                                   | 73                                | 706.00                            | 668.00                           | 0.95 ± 0.010                     | 1934.25                                                            | 1830.14                                                           |
|                                                       | PEAT009              | 2                           | 2                       | 27                                     | 5.27              | 0.68                                          | 40.3                                   | 2.9                                   | 68                                | 440.00                            | 404.00                           | 0.92 ± 0.017                     | 1294.12                                                            | 1188.24                                                           |
|                                                       | PEAT042 <sup>e</sup> | 2                           | 2                       | 36                                     | 5.04              | 0.72                                          | 37.5                                   | 1.9                                   | 65                                | 382.00                            | 357.00                           | 0.93 ± 0.019                     | 1175.38                                                            | 1098.46                                                           |
|                                                       | PEAT043 <sup>e</sup> | 2                           | 2                       | 22                                     | 5.01              | 0.71                                          | 37.0                                   | 1.9                                   | 68                                | 381.00                            | 363.00                           | 0.95 ± 0.019                     | 1120.59                                                            | 1067.65                                                           |
|                                                       | PEAT044 <sup>e</sup> | 2                           | 2                       | 22                                     | 4.98              | 0.73                                          | 38.3                                   | 2.0                                   | 69                                | 356.00                            | 363.00                           | 1.02 ± 0.021                     | 1031.88                                                            | 1052.17                                                           |
|                                                       | PEAT004 <sup>e</sup> | 3.5                         | 7                       | 40                                     | 4.89              | 0.63                                          | 39.6                                   | 1.9                                   | 81                                | NA <sup>d</sup>                   | 594.00                           | NA <sup>d</sup>                  | NA <sup>d</sup>                                                    | 1466.67                                                           |
|                                                       | PEAT005              | 3.5                         | 7                       | 43                                     | 4.89              | 0.67                                          | 37.5                                   | 2.0                                   | 88                                | 713.00                            | 847.00                           | 1.19 ± 0.011                     | 1620.45                                                            | 1925.00                                                           |
| Everglades<br>National Park,<br>Florida, USA<br>(FL2) | PEAT006              | 3.5                         | 7                       | 44                                     | 4.90              | 0.58                                          | 38.3                                   | 2.5                                   | 91                                | 648.00                            | 657.00                           | 1.01 ± 0.011                     | 1424.18                                                            | 1443.96                                                           |
|                                                       | PEAT010              | 2                           | 2                       | 25                                     | 5.13              | 0.91                                          | 41.3                                   | 13.9                                  | 111                               | 182.00                            | 340.00                           | 1.87 ± 0.062                     | 327.93                                                             | 612.61                                                            |
|                                                       | PEAT011              | 2                           | 2                       | 25                                     | 4.10              | 0.90                                          | 61.2                                   | 21.5                                  | 135                               | 545.00                            | 487.00                           | 0.89 ± 0.012                     | 807.41                                                             | 721.48                                                            |
|                                                       | PEAT012              | 2                           | 2                       | 17                                     | 4.09              | 0.95                                          | 66.5                                   | 29.1                                  | 119                               | 262.00                            | 247.00                           | 0.94 ± 0.027                     | 440.34                                                             | 415.13                                                            |
|                                                       | PEAT015              | 2                           | 2                       | 30                                     | 3.97              | 0.87                                          | 31.8                                   | 11.0                                  | 55                                | 227.00                            | 223.00                           | 0.98 ± 0.032                     | 825.45                                                             | 810.91                                                            |
|                                                       | PEAT016              | 3.5                         | 7                       | 33                                     | 4.21              | 0.90                                          | 64.7                                   | 31.1                                  | 85                                | 232.00                            | 410.00                           | 1.77 ± 0.046                     | 545.88                                                             | 964.71                                                            |
|                                                       | PEAT017              | 3.5                         | 7                       | 48                                     | 4.03              | 0.88                                          | 64.2                                   | 16.1                                  | 113                               | 496.00                            | 971.00                           | 1.96 ± 0.024                     | 877.88                                                             | 1718.58                                                           |
|                                                       | PEAT018              | 3.5                         | 7                       | 40                                     | 4.04              | 0.89                                          | 61.8                                   | 35.2                                  | 57                                | 225.00                            | 369.00                           | 1.64 ± 0.044                     | 789.47                                                             | 1294.74                                                           |
| Borneo, Malaysia                                      | PEAT036              | 2                           | 2                       | 37                                     | 2.97              | 0.87                                          | 30.3                                   | 9.3                                   | 66                                | 406.00                            | 322.00                           | 0.79 ± 0.017                     | 1230.30                                                            | 975.76                                                            |
|                                                       | PEAT037 <sup>e</sup> | 2                           | 2                       | 42                                     | 2.98              | 0.82                                          | 29.9                                   | 7.0                                   | 69                                | 368.00                            | NA <sup>d</sup>                  | NA <sup>d</sup>                  | 1066.67                                                            | NA <sup>d</sup>                                                   |
|                                                       | PEAT038              | 2                           | 2                       | 43                                     | 3.02              | 0.83                                          | 30.4                                   | 4.2                                   | 65                                | 508.00                            | 459.00                           | 0.90 ± 0.014                     | 1563.08                                                            | 1412.31                                                           |
|                                                       | PEAT039              | 3.5                         | 7                       | 42                                     | 3.03              | 0.82                                          | 29.4                                   | 7.6                                   | 61                                | 343.00                            | 406.00                           | 1.18 ± 0.024                     | 1124.59                                                            | 1331.15                                                           |
|                                                       | PEAT040 <sup>e</sup> | 3.5                         | 7                       | 38                                     | 3.00              | 0.81                                          | 31.0                                   | 4.1                                   | 66                                | 458.00                            | NA <sup>d</sup>                  | NA <sup>d</sup>                  | 1387.88                                                            | NA <sup>d</sup>                                                   |
|                                                       | PEAT041              | 3.5                         | 7                       | 38                                     | 3.02              | 0.81                                          | 31.5                                   | 7.0                                   | 71                                | 419.00                            | 459.00                           | 1.10 ± 0.019                     | 1180.28                                                            | 1292.96                                                           |

<sup>a</sup>Ultraviolet lamp voltages (OFR185 mode) were used to simulate 2- and 7-days of atmospheric aging<sup>b</sup>Based on 5 L min<sup>-1</sup> flow rate<sup>c</sup>These unpaired samples (fresh and aged, n=5) are not included in the averages by peat type<sup>d</sup>Data not available<sup>e</sup>Samples are with 60 % fuel moisture (n=3) and are treated separately from others (25 % fuel moisture)

Table S2

Paired comparison of averaged fresh vs. aged peat combustion source profiles between 25% and 60% moisture content for Putnam County Lakebed, Florida (FL1) peat

| Aging Time                                                                                                              | Average $\pm$ Standard Deviation of Percent PM <sub>2.5</sub> Mass |                   |                               |                     |
|-------------------------------------------------------------------------------------------------------------------------|--------------------------------------------------------------------|-------------------|-------------------------------|---------------------|
|                                                                                                                         | Subtropical                                                        |                   |                               |                     |
|                                                                                                                         | Putnam County Lakebed, Florida (FL1)                               |                   |                               |                     |
|                                                                                                                         | 2 days (25% fuel moisture)                                         |                   | 2 days (60% fuel moisture)    |                     |
|                                                                                                                         | Fresh 2                                                            | Aged 2            | Fresh 2                       | Aged 2              |
| Peat IDs in the average                                                                                                 | PEAT008 and PEAT009                                                |                   | PEAT042, PEAT043, and PEAT044 |                     |
| Nitric Acid (HNO <sub>3</sub> )                                                                                         | 0.18 $\pm$ 0.033                                                   | 0.39 $\pm$ 0.17   | 0.30 $\pm$ 0.14               | 0.35 $\pm$ 0.12     |
| Ammonia (NH <sub>3</sub> )                                                                                              | 28.030 $\pm$ na                                                    | 4.76 $\pm$ 0.52   | 19.97 $\pm$ 1.22              | 7.64 $\pm$ 1.77     |
| Water-Soluble Sodium (Na <sup>+</sup> )                                                                                 | 0.015 $\pm$ 0.00033                                                | 4.060 $\pm$ 5.70  | 0.020 $\pm$ 0.0051            | 0.030 $\pm$ 0.014   |
| Water-Soluble Potassium (K <sup>+</sup> )                                                                               | 0.010 $\pm$ 0.015                                                  | na <sup>a</sup>   | 0.019 $\pm$ 0.0074            | na <sup>a</sup>     |
| Chloride (Cl <sup>-</sup> )                                                                                             | 0.14 $\pm$ 0.035                                                   | 0.18 $\pm$ 0.10   | 0.021 $\pm$ 0.035             | 0.10 $\pm$ 0.037    |
| Nitrite (NO <sub>2</sub> <sup>-</sup> )                                                                                 | 0.053 $\pm$ 0.071                                                  | 0.011 $\pm$ 0.015 | 0.013 $\pm$ 0.023             | 0.0012 $\pm$ 0.0013 |
| Nitrate (NO <sub>3</sub> <sup>-</sup> )                                                                                 | 0.16 $\pm$ 0.12                                                    | 0.87 $\pm$ 0.15   | 0.13 $\pm$ 0.093              | 0.48 $\pm$ 0.12     |
| Sulfate (SO <sub>4</sub> <sup>=</sup> )                                                                                 | 0.89 $\pm$ 0.97                                                    | 1.60 $\pm$ 1.33   | 0.17 $\pm$ 0.031              | 0.74 $\pm$ 0.032    |
| Ammonium (NH <sub>4</sub> <sup>+</sup> )                                                                                | 0.00070 $\pm$ 0.00099                                              | 0.052 $\pm$ 0.074 | 0.0028 $\pm$ 0.0012           | 0.39 $\pm$ 0.049    |
| OC1 (140 °C)                                                                                                            | 9.54 $\pm$ 2.50                                                    | 7.48 $\pm$ 3.12   | 11.93 $\pm$ 3.51              | 5.25 $\pm$ 0.79     |
| OC2 (280 °C)                                                                                                            | 21.66 $\pm$ 2.045                                                  | 19.50 $\pm$ 0.85  | 20.98 $\pm$ 0.40              | 15.66 $\pm$ 2.71    |
| OC3 (480 °C)                                                                                                            | 25.30 $\pm$ 7.61                                                   | 24.97 $\pm$ 0.95  | 29.42 $\pm$ 1.63              | 25.93 $\pm$ 3.050   |
| OC4 (580 °C)                                                                                                            | 7.60 $\pm$ 4.045                                                   | 7.76 $\pm$ 1.017  | 6.71 $\pm$ 1.35               | 7.61 $\pm$ 2.46     |
| Pyrolyzed Carbon                                                                                                        | 7.61 $\pm$ 1.80                                                    | 10.45 $\pm$ 1.14  | 12.90 $\pm$ 0.72              | 9.59 $\pm$ 2.18     |
| Organic Carbon (OC) <sup>b</sup>                                                                                        | 71.71 $\pm$ 9.40                                                   | 70.16 $\pm$ 5.033 | 81.94 $\pm$ 3.86              | 64.032 $\pm$ 7.51   |
| EC1 (580 °C)                                                                                                            | 7.61 $\pm$ 2.43                                                    | 9.58 $\pm$ 1.36   | 9.33 $\pm$ 0.85               | 8.19 $\pm$ 1.15     |
| EC2 (740 °C)                                                                                                            | 3.51 $\pm$ 2.51                                                    | 2.94 $\pm$ 2.34   | 6.38 $\pm$ 0.055              | 3.81 $\pm$ 1.010    |
| EC3 (840 °C)                                                                                                            | 0.00 $\pm$ 0.00                                                    | 0.00 $\pm$ 0.00   | 0.00 $\pm$ 0.00               | 0.00 $\pm$ 0.00     |
| Elemental Carbon (EC) <sup>b</sup>                                                                                      | 3.51 $\pm$ 1.72                                                    | 2.076 $\pm$ 0.16  | 2.80 $\pm$ 0.42               | 2.42 $\pm$ 2.43     |
| Total Carbon (TC)                                                                                                       | 75.23 $\pm$ 11.12                                                  | 72.24 $\pm$ 4.88  | 84.74 $\pm$ 4.26              | 66.45 $\pm$ 9.51    |
| Water-Soluble OC (WSOC)                                                                                                 | 19.53 $\pm$ 4.67                                                   | 22.71 $\pm$ 4.43  | 29.61 $\pm$ 14.67             | 23.75 $\pm$ 4.02    |
| Formic acid (CH <sub>2</sub> O <sub>2</sub> )                                                                           | 0.11 $\pm$ 0.097                                                   | 0.20 $\pm$ 0.13   | 0.13 $\pm$ 0.049              | 0.27 $\pm$ 0.053    |
| Acetic acid (C <sub>2</sub> H <sub>4</sub> O <sub>2</sub> )                                                             | 0.19 $\pm$ 0.15                                                    | 0.047 $\pm$ 0.011 | 0.57 $\pm$ 0.22               | 0.78 $\pm$ 0.34     |
| Oxalic acid (C <sub>2</sub> H <sub>2</sub> O <sub>4</sub> )                                                             | 0.050 $\pm$ 0.070                                                  | 0.58 $\pm$ 0.26   | 0.38 $\pm$ 0.091              | 0.73 $\pm$ 0.070    |
| Propionic acid (C <sub>3</sub> H <sub>6</sub> O <sub>2</sub> )                                                          | 0.00 $\pm$ 0.00                                                    | 0.00 $\pm$ 0.00   | 0.021 $\pm$ 0.019             | 0.021 $\pm$ 0.036   |
| Levogluconan (C <sub>6</sub> H <sub>10</sub> O <sub>5</sub> )                                                           | 3.15 $\pm$ 0.0092                                                  | 2.78 $\pm$ 0.041  | 3.79 $\pm$ 0.42               | 2.45 $\pm$ 0.22     |
| Mannosan (C <sub>6</sub> H <sub>10</sub> O <sub>5</sub> )                                                               | 0.00 $\pm$ 0.00                                                    | 0.00 $\pm$ 0.00   | 0.25 $\pm$ 0.42               | 0.29 $\pm$ 0.50     |
| Galactose/Maltitol<br>(C <sub>6</sub> H <sub>12</sub> O <sub>6</sub> /C <sub>12</sub> H <sub>24</sub> O <sub>11</sub> ) | 0.00 $\pm$ 0.00                                                    | 0.00 $\pm$ 0.00   | 0.00 $\pm$ 0.00               | 0.00 $\pm$ 0.00     |
| Glycerol (C <sub>3</sub> H <sub>8</sub> O <sub>3</sub> )                                                                | 0.00 $\pm$ 0.00                                                    | 0.00 $\pm$ 0.00   | 0.096 $\pm$ 0.11              | 0.00 $\pm$ 0.00     |
| Mannitol (C <sub>6</sub> H <sub>14</sub> O <sub>6</sub> )                                                               | 0.00 $\pm$ 0.00                                                    | 0.00 $\pm$ 0.00   | 0.00 $\pm$ 0.00               | 0.00 $\pm$ 0.00     |
| Aluminum (Al)                                                                                                           | 0.026 $\pm$ 0.059                                                  | 0.069 $\pm$ 0.97  | 0.043 $\pm$ 0.49              | 0.13 $\pm$ 0.16     |
| Silicon (Si)                                                                                                            | 0.00 $\pm$ 0.00                                                    | 0.021 $\pm$ 0.22  | 0.018 $\pm$ 0.30              | 0.14 $\pm$ 0.45     |
| Phosphorous (P)                                                                                                         | 0.00 $\pm$ 0.00                                                    | 0.00 $\pm$ 0.00   | 0.00 $\pm$ 0.00               | 0.00 $\pm$ 0.00     |

Table S2 (cont'd)

| Aging Time              | Average $\pm$ Standard Deviation of Percent PM <sub>2.5</sub> Mass |                       |                               |                      |
|-------------------------|--------------------------------------------------------------------|-----------------------|-------------------------------|----------------------|
|                         | Subtropical                                                        |                       |                               |                      |
|                         | Putnam County Lakebed, Florida (FL1)                               |                       |                               |                      |
|                         | 2 days (25% fuel moisture)                                         |                       | 2 days (60% fuel moisture)    |                      |
|                         | Fresh 2                                                            | Aged 2                | Fresh 2                       | Aged 2               |
| Peat IDs in the average | PEAT008 and PEAT009                                                |                       | PEAT042, PEAT043, and PEAT044 |                      |
| Sulfur (S)              | 0.19 $\pm$ 0.056                                                   | 0.37 $\pm$ 0.24       | 0.13 $\pm$ 0.021              | 0.54 $\pm$ 0.019     |
| Chlorine (Cl)           | 0.12 $\pm$ 0.0064                                                  | 0.067 $\pm$ 0.024     | 0.18 $\pm$ 0.028              | 0.079 $\pm$ 0.0082   |
| Potassium (K)           | 0.0092 $\pm$ 0.012                                                 | 0.057 $\pm$ 0.035     | 0.22 $\pm$ 0.016              | 0.028 $\pm$ 0.0080   |
| Calcium (Ca)            | 0.0040 $\pm$ 0.0056                                                | 0.00 $\pm$ 0.00       | 0.013 $\pm$ 0.023             | 0.00 $\pm$ 0.00      |
| Scandium (Sc)           | 0.00 $\pm$ 0.00                                                    | 0.00 $\pm$ 0.00       | 0.00 $\pm$ 0.00               | 0.00 $\pm$ 0.00      |
| Titanium (Ti)           | 0.0036 $\pm$ 0.0050                                                | 0.00 $\pm$ 0.00       | 0.00 $\pm$ 0.00               | 0.00 $\pm$ 0.00      |
| Vanadium (V)            | 0.00 $\pm$ 0.00                                                    | 0.00 $\pm$ 0.00       | 0.00 $\pm$ 0.00               | 0.00 $\pm$ 0.00      |
| Chromium (Cr)           | 0.00 $\pm$ 0.00                                                    | 0.00 $\pm$ 0.00       | 0.0011 $\pm$ 0.0016           | 0.016 $\pm$ 0.023    |
| Manganese (Mn)          | 0.0013 $\pm$ 0.0012                                                | 0.00033 $\pm$ 0.00047 | 0.0065 $\pm$ 0.0026           | 0.00077 $\pm$ 0.0011 |
| Iron (Fe)               | 0.00 $\pm$ 0.00                                                    | 0.047 $\pm$ 0.040     | 0.038 $\pm$ 0.012             | 0.13 $\pm$ 0.12      |
| Cobalt (Co)             | 0.00 $\pm$ 0.00                                                    | 0.00021 $\pm$ 0.00030 | 0.00 $\pm$ 0.00               | 0.00 $\pm$ 0.00      |
| Nickel (Ni)             | 0.00045 $\pm$ 0.00064                                              | 0.00 $\pm$ 0.00       | 0.00 $\pm$ 0.00               | 0.00 $\pm$ 0.00      |
| Copper (Cu)             | 0.00 $\pm$ 0.00                                                    | 0.0035 $\pm$ 0.0049   | 0.036 $\pm$ 0.033             | 0.027 $\pm$ 0.024    |
| Zinc (Zn)               | 0.0013 $\pm$ 0.0015                                                | 0.0023 $\pm$ 0.0032   | 0.025 $\pm$ 0.021             | 0.026 $\pm$ 0.026    |
| Arsenic (As)            | 0.00 $\pm$ 0.00                                                    | 0.00 $\pm$ 0.00       | 0.00 $\pm$ 0.00               | 0.00 $\pm$ 0.00      |
| Selenium (Se)           | 0.0017 $\pm$ 0.00092                                               | 0.00 $\pm$ 0.00       | 0.0020 $\pm$ 0.0024           | 0.0033 $\pm$ 0.0047  |
| Bromine (Br)            | 0.020 $\pm$ 0.00098                                                | 0.0077 $\pm$ 0.010    | 0.022 $\pm$ 0.0065            | 0.013 $\pm$ 0.0024   |
| Rubidium (Rb)           | 0.00011 $\pm$ 0.00016                                              | 0.00095 $\pm$ 0.0013  | 0.0012 $\pm$ 0.0018           | 0.0019 $\pm$ 0.0026  |
| Strontium (Sr)          | 0.0023 $\pm$ 0.00057                                               | 0.0038 $\pm$ 0.0013   | 0.0061 $\pm$ 0.0019           | 0.0042 $\pm$ 0.0026  |
| Yttrium (Y)             | 0.0014 $\pm$ 0.00029                                               | 0.0012 $\pm$ 0.0018   | 0.0030 $\pm$ 0.0041           | 0.0029 $\pm$ 0.0017  |
| Zirconium (Zr)          | 0.0016 $\pm$ 0.0023                                                | 0.0003 $\pm$ 0.00089  | 0.0042 $\pm$ 0.0046           | 0.0070 $\pm$ 0.0038  |
| Niobium (Nb)            | 0.0016 $\pm$ 0.0023                                                | 0.00082 $\pm$ 0.0012  | 0.0013 $\pm$ 0.0015           | 0.0013 $\pm$ 0.0019  |
| Molybdenum (Mo)         | 0.00 $\pm$ 0.00                                                    | 0.00063 $\pm$ 0.00089 | 0.0034 $\pm$ 0.0036           | 0.0013 $\pm$ 0.0019  |
| Silver (Ag)             | 0.0010 $\pm$ 0.0014                                                | 0.00 $\pm$ 0.00       | 0.00 $\pm$ 0.00               | 0.00 $\pm$ 0.00      |
| Cadmium (Cd)            | 0.0034 $\pm$ 0.0049                                                | 0.00 $\pm$ 0.00       | 0.00 $\pm$ 0.00               | 0.00 $\pm$ 0.00      |
| Indium (In)             | 0.00068 $\pm$ 0.00096                                              | 0.0025 $\pm$ 0.0036   | 0.0025 $\pm$ 0.0024           | 0.0038 $\pm$ 0.0054  |
| Tin (Sn)                | 0.0037 $\pm$ 0.00047                                               | 0.0034 $\pm$ 0.0048   | 0.00049 $\pm$ 0.00085         | 0.0066 $\pm$ 0.0093  |
| Antimony (Sb)           | 0.00 $\pm$ 0.00                                                    | 0.0072 $\pm$ 0.010    | 0.0031 $\pm$ 0.0053           | 0.010 $\pm$ 0.014    |
| Cesium (Cs)             | 0.00 $\pm$ 0.00                                                    | 0.00 $\pm$ 0.00       | 0.018 $\pm$ 0.029             | 0.0086 $\pm$ 0.012   |
| Barium (Ba)             | 0.00 $\pm$ 0.00                                                    | 0.00 $\pm$ 0.00       | 0.013 $\pm$ 0.022             | 0.00 $\pm$ 0.00      |
| Lanthanum (La)          | 0.042 $\pm$ 0.044                                                  | 0.0053 $\pm$ 0.0075   | 0.045 $\pm$ 0.039             | 0.010 $\pm$ 0.014    |
| Wolfram (W)             | 0.0037 $\pm$ 0.0018                                                | 0.0034 $\pm$ 0.0049   | 0.00010 $\pm$ 0.00018         | 0.0053 $\pm$ 0.0075  |
| Gold (Au)               | 0.00062 $\pm$ 0.00088                                              | 0.00 $\pm$ 0.00       | 0.0016 $\pm$ 0.0015           | 0.00 $\pm$ 0.00      |
| Mercury (Hg)            | 0.00020 $\pm$ 0.00028                                              | 0.0014 $\pm$ 0.0020   | 0.00 $\pm$ 0.00               | 0.00 $\pm$ 0.00      |
| Lead (Pb)               | 0.0015 $\pm$ 0.0021                                                | 0.0014 $\pm$ 0.000962 | 0.0038 $\pm$ 0.0063           | 0.0033 $\pm$ 0.00    |
| Uranium (U)             | 0.0034 $\pm$ 0.0044                                                | 0.00 $\pm$ 0.00       | 0.0023 $\pm$ 0.0040           | 0.0036 $\pm$ 0.0051  |

<sup>a</sup>Water-soluble K<sup>+</sup> data were contaminated due to the use of potassium iodide denuder downstream of the oxidation flow reactor

<sup>b</sup>The carbon analysis follows the IMPROVE\_A thermal/optical reflectance protocol (Chow et al., 2007) that is applied in long-term U.S. non-urban IMPROVE and urban Chemical Speciation Network. Organic carbon (OC) is the sum of OC1+OC2+OC3+OC4 plus pyrolyzed carbon (OP). Elemental carbon (EC) is the sum of EC1+EC2+EC3 minus OP. Total carbon is the sum of OC and EC. Since a large fraction of OP (7–13 %) are found in smoldering peat combustion emissions--indicative of higher molecular-weight compounds that are likely to char, the resulting EC are lower than the individual EC fraction after OP correction.

Table S3  
Unpaired fresh or aged peat source profiles

|                                                                                                                      | Average ± Standard Deviation of Percent PM <sub>2.5</sub> Mass |                      |                                           |                   |                   |
|----------------------------------------------------------------------------------------------------------------------|----------------------------------------------------------------|----------------------|-------------------------------------------|-------------------|-------------------|
| Peat Location                                                                                                        | Pskov, Siberia                                                 | Northern Alaska, USA | Putnam County Lakebed, Florida (FL1), USA | Borneo, Malaysia  | Borneo, Malaysia  |
| Aging Time                                                                                                           | Fresh 2                                                        | Fresh 7              | Aged 7                                    | Fresh 2           | Fresh 7           |
| Peat ID                                                                                                              | PEAT024                                                        | PEAT021              | PEAT004                                   | PEAT037           | PEAT040- F7       |
| Nitric Acid (HNO <sub>3</sub> )                                                                                      | 0.25 ± 0.00026                                                 | 0.22 ± 0.00019       | 0.39 ± 0.00019                            | 0.21 ± 0.00019    | 0.28 ± 0.00018    |
| Ammonia (NH <sub>3</sub> )                                                                                           | 20.50 ± 0.0071                                                 | 8.86 ± 0.0028        | 1.84 ± 0.00055                            | 25.088 ± 0.0080   | 22.63 ± 0.0069    |
| Water-Soluble Sodium (Na <sup>+</sup> )                                                                              | 0.025 ± 0.00083                                                | 0.032 ± 0.00060      | 0.046 ± 0.00037                           | 0.013 ± 0.00060   | 0.012 ± 0.00048   |
| Water-Soluble Potassium (K <sup>+</sup> )                                                                            | 0.051 ± 0.000083                                               | 0.035 ± 0.000059     | na <sup>a</sup>                           | 0.027 ± 0.000056  | 0.036 ± 0.000051  |
| Chloride (Cl <sup>-</sup> )                                                                                          | 0.16 ± 0.00024                                                 | 0.21 ± 0.00019       | 0.10 ± 0.00011                            | 0.10 ± 0.00017    | 0.12 ± 0.00014    |
| Nitrite (NO <sub>2</sub> <sup>-</sup> )                                                                              | 0.00 ± 0.00040                                                 | 0.00 ± 0.00029       | 0.0011 ± 0.00018                          | 0.00 ± 0.00029    | 0.0055 ± 0.00023  |
| Nitrate (NO <sub>3</sub> <sup>-</sup> )                                                                              | 0.087 ± 0.00048                                                | 0.097 ± 0.00035      | 2.038 ± 0.00099                           | 0.080 ± 0.00034   | 0.075 ± 0.00028   |
| Sulfate (SO <sub>4</sub> <sup>=</sup> )                                                                              | 0.63 ± 0.00044                                                 | 0.19 ± 0.00014       | 1.78 ± 0.0012                             | 0.25 ± 0.00018    | 0.17 ± 0.00012    |
| Ammonium (NH <sub>4</sub> <sup>+</sup> )                                                                             | 0.0024 ± 0.00012                                               | 0.0017 ± 0.000086    | 1.60 ± 0.0012                             | 0.0017 ± 0.000086 | 0.0021 ± 0.000069 |
| OC1 (140°C)                                                                                                          | 11.36 ± 0.028                                                  | 15.22 ± 0.038        | 8.61 ± 0.021                              | 11.26 ± 0.028     | 12.92 ± 0.032     |
| OC2 (280°C)                                                                                                          | 20.84 ± 0.013                                                  | 15.56 ± 0.0094       | 21.65 ± 0.012                             | 24.48 ± 0.014     | 24.47 ± 0.014     |
| OC3 (480°C)                                                                                                          | 28.60 ± 0.022                                                  | 24.19 ± 0.018        | 27.92 ± 0.021                             | 29.83 ± 0.022     | 27.041 ± 0.020    |
| OC4 (590°C)                                                                                                          | 9.29 ± 0.0083                                                  | 4.27 ± 0.0038        | 6.75 ± 0.0059                             | 9.17 ± 0.0081     | 8.090 ± 0.0071    |
| Pyrolyzed Carbon                                                                                                     | 13.04 ± 0.021                                                  | 12.18 ± 0.019        | 11.58 ± 0.018                             | 9.71 ± 0.015      | 8.90 ± 0.014      |
| Organic Carbon (OC) <sup>c</sup>                                                                                     | 83.13 ± 0.046                                                  | 71.42 ± 0.038        | 76.52 ± 0.040                             | 84.45 ± 0.045     | 81.41 ± 0.043     |
| EC1 (580°C)                                                                                                          | 6.47 ± 0.014                                                   | 7.043 ± 0.016        | 12.061 ± 0.026                            | 7.11 ± 0.016      | 6.14 ± 0.014      |
| EC2 (740°C)                                                                                                          | 6.95 ± 0.0077                                                  | 5.13 ± 0.0056        | 2.15 ± 0.0024                             | 4.17 ± 0.0046     | 4.88 ± 0.0053     |
| EC3 (840°C)                                                                                                          | 0.00 ± 0.00028                                                 | 0.00 ± 0.00021       | 0.00 ± 0.00013                            | 0.00 ± 0.00020    | 0.00 ± 0.00016    |
| Elemental Carbon (EC) <sup>c</sup>                                                                                   | 0.38 ± 0.0017                                                  | 0.00 ± 0.0011        | 2.63 ± 0.0038                             | 1.56 ± 0.0025     | 2.12 ± 0.0031     |
| Total Carbon (TC)                                                                                                    | 83.51 ± 0.044                                                  | 71.42 ± 0.036        | 79.15 ± 0.039                             | 86.012 ± 0.043    | 83.54 ± 0.041     |
| Water-Soluble OC                                                                                                     | 28.17 ± 0.038                                                  | 31.49 ± 0.042        | 26.04 ± 0.035                             | 17.14 ± 0.023     | 15.90 ± 0.021     |
| Formic acid (CH <sub>2</sub> O <sub>2</sub> )                                                                        | 0.047 ± 0.000069                                               | 0.074 ± 0.00011      | 0.19 ± 0.00028                            | 0.14 ± 0.00021    | 0.11 ± 0.00016    |
| Acetic acid (C <sub>2</sub> H <sub>4</sub> O <sub>2</sub> )                                                          | 0.28 ± 0.00034                                                 | 0.41 ± 0.00049       | 0.25 ± 0.00030                            | 0.47 ± 0.00057    | 0.32 ± 0.00039    |
| Oxalic acid (C <sub>2</sub> H <sub>2</sub> O <sub>4</sub> )                                                          | 0.00 ± 0.00                                                    | 0.00 ± 0.00          | 1.45 ± 0.0022                             | 0.27 ± 0.00041    | 0.33 ± 0.00049    |
| Propionic acid (C <sub>3</sub> H <sub>6</sub> O <sub>2</sub> )                                                       | 0.050 ± 0.00020                                                | 0.00 ± 0.00014       | 0.00 ± 0.000088                           | 0.00 ± 0.00014    | 0.020 ± 0.00011   |
| Levogluconan (C <sub>6</sub> H <sub>10</sub> O <sub>5</sub> )                                                        | 6.17 ± 0.015                                                   | 11.82 ± 0.029        | 2.40 ± 0.0059                             | 4.084 ± 0.010     | 5.66 ± 0.014      |
| Mannosan (C <sub>6</sub> H <sub>10</sub> O <sub>5</sub> )                                                            | 0.00 ± 0.00043                                                 | 5.32 ± 0.016         | 0.00 ± 0.00019                            | 0.00 ± 0.00031    | 1.27 ± 0.0081     |
| Galactose/Maltitol (C <sub>6</sub> H <sub>12</sub> O <sub>6</sub> /C <sub>12</sub> H <sub>24</sub> O <sub>11</sub> ) | 0.00 ± 0.00022                                                 | 0.00 ± 0.00016       | 0.00 ± 0.000099                           | 0.00 ± 0.00016    | 0.00 ± 0.00013    |
| Glycerol (C <sub>3</sub> H <sub>8</sub> O <sub>3</sub> )                                                             | 0.00 ± 0.0000040                                               | 0.00 ± 0.0000029     | 0.00 ± 0.0000018                          | 0.00 ± 0.0000029  | 0.00 ± 0.0000023  |
| Mannitol (C <sub>6</sub> H <sub>14</sub> O <sub>6</sub> )                                                            | 0.00 ± 0.000079                                                | 0.00 ± 0.000057      | 0.00 ± 0.000035                           | 0.00 ± 0.000057   | 0.00 ± 0.000046   |
| Aluminum (Al)                                                                                                        | 0.00 ± 0.052                                                   | 0.053 ± 0.038        | na <sup>b</sup>                           | 0.074 ± 0.038     | 0.016 ± 0.030     |
| Silicon (Si)                                                                                                         | 0.00 ± 0.0061                                                  | 0.043 ± 0.0045       | na <sup>b</sup>                           | 0.0071 ± 0.0045   | 0.0023 ± 0.0036   |
| Phosphorous (P)                                                                                                      | 0.00 ± 0.00012                                                 | 0.00 ± 0.000089      | na <sup>b</sup>                           | 0.00 ± 0.000088   | 0.00 ± 0.000071   |

Table S3 (cont'd)

|                 | Average $\pm$ Standard Deviation of Percent PM <sub>2.5</sub> Mass |                       |                                           |                         |                        |
|-----------------|--------------------------------------------------------------------|-----------------------|-------------------------------------------|-------------------------|------------------------|
| Peat Location   | Pskov, Siberia                                                     | Northern Alaska, USA  | Putnam County Lakebed, Florida (FL1), USA | Borneo, Malaysia        | Borneo, Malaysia       |
| Aging Time      | Fresh 2                                                            | Fresh 7               | Aged 7                                    | Fresh 2                 | Fresh 7                |
| Peat ID         | PEAT024                                                            | PEAT021               | PEAT004                                   | PEAT037                 | PEAT040- F7            |
| Sulfur (S)      | 0.00 $\pm$ 0.000065                                                | 0.094 $\pm$ 0.000058  | na <sup>b</sup>                           | 0.097 $\pm$ 0.000058    | 0.091 $\pm$ 0.000048   |
| Chlorine (Cl)   | 0.12 $\pm$ 0.000064                                                | 0.15 $\pm$ 0.000060   | na <sup>b</sup>                           | 0.082 $\pm$ 0.000043    | 0.12 $\pm$ 0.000046    |
| Potassium (K)   | 0.047 $\pm$ 0.00017                                                | 0.11 $\pm$ 0.00013    | na <sup>b</sup>                           | 0.026 $\pm$ 0.00013     | 0.027 $\pm$ 0.00010    |
| Calcium (Ca)    | 0.00 $\pm$ 0.00065                                                 | 0.010 $\pm$ 0.00047   | na <sup>b</sup>                           | 0.00 $\pm$ 0.00046      | 0.00 $\pm$ 0.00037     |
| Scandium (Sc)   | 0.00 $\pm$ 0.0029                                                  | 0.00 $\pm$ 0.0021     | na <sup>b</sup>                           | 0.00 $\pm$ 0.0021       | 0.00 $\pm$ 0.0017      |
| Titanium (Ti)   | 0.00 $\pm$ 0.00010                                                 | 0.030 $\pm$ 0.000075  | na <sup>b</sup>                           | 0.016 $\pm$ 0.000074    | 0.013 $\pm$ 0.000060   |
| Vanadium (V)    | 0.00 $\pm$ 0.000019                                                | 0.00 $\pm$ 0.000014   | na <sup>b</sup>                           | 0.00 $\pm$ 0.000014     | 0.00 $\pm$ 0.000011    |
| Chromium (Cr)   | 0.00 $\pm$ 0.000065                                                | 0.025 $\pm$ 0.000047  | na <sup>b</sup>                           | 0.00 $\pm$ 0.000046     | 0.00 $\pm$ 0.000037    |
| Manganese (Mn)  | 0.00 $\pm$ 0.00023                                                 | 0.015 $\pm$ 0.00016   | na <sup>b</sup>                           | 0.012 $\pm$ 0.00016     | 0.0083 $\pm$ 0.00013   |
| Iron (Fe)       | 0.00 $\pm$ 0.00039                                                 | 0.24 $\pm$ 0.00030    | na <sup>b</sup>                           | 0.041 $\pm$ 0.00028     | 0.014 $\pm$ 0.00023    |
| Cobalt (Co)     | 0.00 $\pm$ 0.000013                                                | 0.00 $\pm$ 0.0000093  | na <sup>b</sup>                           | 0.00010 $\pm$ 0.0000092 | 0.00 $\pm$ 0.0000074   |
| Nickel (Ni)     | 0.0006 $\pm$ 0.000032                                              | 0.0070 $\pm$ 0.000023 | na <sup>b</sup>                           | 0.00010 $\pm$ 0.000023  | 0.00030 $\pm$ 0.000019 |
| Copper (Cu)     | 0.00 $\pm$ 0.00020                                                 | 0.0051 $\pm$ 0.00015  | na <sup>b</sup>                           | 0.00 $\pm$ 0.00014      | 0.0035 $\pm$ 0.00012   |
| Zinc (Zn)       | 0.0024 $\pm$ 0.00011                                               | 0.0054 $\pm$ 0.000079 | na <sup>b</sup>                           | 0.0021 $\pm$ 0.000079   | 0.0077 $\pm$ 0.000063  |
| Arsenic (As)    | 0.0031 $\pm$ 0.000051                                              | 0.00 $\pm$ 0.000037   | na <sup>b</sup>                           | 0.00 $\pm$ 0.000037     | 0.00 $\pm$ 0.000030    |
| Selenium (Se)   | 0.0014 $\pm$ 0.000090                                              | 0.00 $\pm$ 0.000065   | na <sup>b</sup>                           | 0.00 $\pm$ 0.000065     | 0.00 $\pm$ 0.000052    |
| Bromine (Br)    | 0.0036 $\pm$ 0.000026                                              | 0.0030 $\pm$ 0.000019 | na <sup>b</sup>                           | 0.013 $\pm$ 0.000019    | 0.0089 $\pm$ 0.000015  |
| Rubidium (Rb)   | 0.00 $\pm$ 0.000032                                                | 0.00 $\pm$ 0.000023   | na <sup>b</sup>                           | 0.00080 $\pm$ 0.000023  | 0.0014 $\pm$ 0.000019  |
| Strontium (Sr)  | 0.0041 $\pm$ 0.000032                                              | 0.0036 $\pm$ 0.000023 | na <sup>b</sup>                           | 0.0049 $\pm$ 0.000023   | 0.0045 $\pm$ 0.000019  |
| Yttrium (Y)     | 0.00 $\pm$ 0.000032                                                | 0.0083 $\pm$ 0.000023 | na <sup>b</sup>                           | 0.00 $\pm$ 0.000023     | 0.00010 $\pm$ 0.000019 |
| Zirconium (Zr)  | 0.0041 $\pm$ 0.00012                                               | 0.0020 $\pm$ 0.000089 | na <sup>b</sup>                           | 0.0062 $\pm$ 0.000088   | 0.0040 $\pm$ 0.000071  |
| Niobium (Nb)    | 0.00 $\pm$ 0.000058                                                | 0.00 $\pm$ 0.000042   | na <sup>b</sup>                           | 0.00 $\pm$ 0.000042     | 0.00030 $\pm$ 0.000034 |
| Molybdenum (Mo) | 0.0027 $\pm$ 0.00012                                               | 0.00 $\pm$ 0.000089   | na <sup>b</sup>                           | 0.00 $\pm$ 0.000088     | 0.0010 $\pm$ 0.000071  |
| Silver (Ag)     | 0.00 $\pm$ 0.00015                                                 | 0.00 $\pm$ 0.00011    | na <sup>b</sup>                           | 0.00 $\pm$ 0.00011      | 0.00 $\pm$ 0.000089    |
| Cadmium (Cd)    | 0.00 $\pm$ 0.00021                                                 | 0.00 $\pm$ 0.00015    | na <sup>b</sup>                           | 0.00 $\pm$ 0.00015      | 0.00 $\pm$ 0.00012     |
| Indium (In)     | 0.015 $\pm$ 0.00015                                                | 0.00 $\pm$ 0.00011    | na <sup>b</sup>                           | 0.00 $\pm$ 0.00011      | 0.0026 $\pm$ 0.000086  |
| Tin (Sn)        | 0.0021 $\pm$ 0.00027                                               | 0.00 $\pm$ 0.00020    | na <sup>b</sup>                           | 0.018 $\pm$ 0.00019     | 0.011 $\pm$ 0.00016    |
| Antimony (Sb)   | 0.00 $\pm$ 0.00041                                                 | 0.00 $\pm$ 0.00029    | na <sup>b</sup>                           | 0.00 $\pm$ 0.00029      | 0.0061 $\pm$ 0.00023   |
| Cesium (Cs)     | 0.00 $\pm$ 0.0011                                                  | 0.00 $\pm$ 0.00082    | na <sup>b</sup>                           | 0.045 $\pm$ 0.00082     | 0.00 $\pm$ 0.00066     |
| Barium (Ba)     | 0.00 $\pm$ 0.00085                                                 | 0.00 $\pm$ 0.00062    | na <sup>b</sup>                           | 0.00 $\pm$ 0.00061      | 0.00 $\pm$ 0.00049     |
| Lanthanum (La)  | 0.16 $\pm$ 0.0017                                                  | 0.00 $\pm$ 0.0012     | na <sup>b</sup>                           | 0.00 $\pm$ 0.0012       | 0.00 $\pm$ 0.00097     |
| Wolfram (W)     | 0.00 $\pm$ 0.00033                                                 | 0.0056 $\pm$ 0.00024  | na <sup>b</sup>                           | 0.00 $\pm$ 0.00024      | 0.016 $\pm$ 0.00019    |
| Gold (Au)       | 0.0011 $\pm$ 0.000097                                              | 0.00 $\pm$ 0.000070   | na <sup>b</sup>                           | 0.00 $\pm$ 0.000070     | 0.00 $\pm$ 0.000056    |
| Mercury (Hg)    | 0.00 $\pm$ 0.000051                                                | 0.00 $\pm$ 0.000037   | na <sup>b</sup>                           | 0.00 $\pm$ 0.000037     | 0.00 $\pm$ 0.000030    |
| Lead (Pb)       | 0.00 $\pm$ 0.000097                                                | 0.00 $\pm$ 0.000070   | na <sup>b</sup>                           | 0.00 $\pm$ 0.000070     | 0.00 $\pm$ 0.000056    |
| Uranium (U)     | 0.017 $\pm$ 0.00017                                                | 0.0038 $\pm$ 0.00013  | na <sup>b</sup>                           | 0.0012 $\pm$ 0.00013    | 0.0044 $\pm$ 0.00010   |

<sup>a</sup>Water-soluble K<sup>+</sup> data were contaminated due to the use of potassium iodide denuder downstream of the oxidation flow reactor

<sup>b</sup>Data not available due to the lack of elemental measurements from x-ray fluorescence analysis

<sup>c</sup>The carbon analysis follows the IMPROVE\_A thermal/optical reflectance protocol (Chow et al., 2007) that is applied in long-term U.S. non-urban IMPROVE and urban Chemical Speciation Network. Organic carbon (OC) is the sum of OC1+OC2+OC3+OC4 plus pyrolyzed carbon (OP). Elemental carbon (EC) is the sum of EC1+EC2+EC3 minus OP. Total carbon is the sum of OC and EC. Since a large fraction of OP (7–13 %) are found in smoldering peat combustion emissions--indicative of higher molecular-weight compounds that are likely to char, the resulting EC are lower than the individual EC fraction after OP correction.

Table S4

Equivalence measures<sup>a</sup> for paired fresh and aged source profiles for the Putnam County Lakebed (FL1) and Everglades National Park (FL2), Florida peats.

| <b>A. Putnam County Lakebed (FL1) vs. Everglades National Park (FL2)</b> |                                |                |                |              |                             |                        |                 |                 |
|--------------------------------------------------------------------------|--------------------------------|----------------|----------------|--------------|-----------------------------|------------------------|-----------------|-----------------|
| Paired Comparison <sup>b</sup>                                           | R/U Ratio Percent Distribution |                |                |              | Correlation Coefficient (r) | Student <i>t</i> -Test | df <sup>c</sup> | <i>P</i> -value |
|                                                                          | < 1 $\sigma$                   | 1 - 2 $\sigma$ | 2 - 3 $\sigma$ | > 3 $\sigma$ |                             |                        |                 |                 |
| FL1 Fresh 2 vs. FL2 Fresh 2                                              | 82.26%                         | 16.13%         | 0.81%          | 0.81%        | 0.996                       | Paired                 | 126             | 0.0000          |
| FL1 Fresh 7 vs. FL2 Fresh 7                                              | 59.20%                         | 18.40%         | 16.80%         | 5.60%        | 0.998                       | Paired                 | 126             | 0.0000          |
| FL1 Aged 2 vs. FL2 Aged 2                                                | 92.00%                         | 6.40%          | 0.80%          | 0.80%        | 0.998                       | Paired                 | 126             | 0.0006          |
| FL1 Aged 7 vs. FL2 Aged 7                                                | 60.32%                         | 15.87%         | 17.46%         | 6.35%        | 0.994                       | Paired                 | 126             | 0.0015          |

  

| <b>B. FL1 and FL2 combined</b> |                                |                |                |                 |                             |                        |                 |                 |
|--------------------------------|--------------------------------|----------------|----------------|-----------------|-----------------------------|------------------------|-----------------|-----------------|
| Paired Comparison <sup>d</sup> | R/U Ratio Percent Distribution |                |                |                 | Correlation Coefficient (r) | Student <i>t</i> -Test | df <sup>c</sup> | <i>P</i> -value |
|                                | < 1 $\sigma$                   | 1 - 2 $\sigma$ | 2 - 3 $\sigma$ | $\geq 3 \sigma$ |                             |                        |                 |                 |
| All Fresh 2 vs. All Aged 2     | 92.86%                         | 6.35%          | 0.79%          | 0.00%           | 0.992                       | Paired                 | 126             | 0.0000          |
| All Fresh 7 vs. All Aged 7     | 73.02%                         | 23.81%         | 2.38%          | 0.79%           | 0.974                       | Paired                 | 126             | 0.0002          |
| All Fresh 2 vs. All Fresh 7    | 98.41%                         | 1.59%          | 0.00%          | 0.00%           | 0.997                       | Paired                 | 126             | 0.5234          |
| All Aged 2 vs. All Aged 7      | 93.65%                         | 6.35%          | 0.00%          | 0.00%           | 0.998                       | Paired                 | 126             | 0.0019          |
| All Fresh vs. All Aged         | 92.86%                         | 7.14%          | 0.00%          | 0.00%           | 0.985                       | Paired                 | 126             | 0.0001          |

<sup>a</sup>For the *t*-test, a cutoff probability level of 5% is selected; if  $P < 0.05$ , there is a 95% probability that the two profiles are different. For correlations,  $r > 0.8$  suggests similar profiles,  $0.5 < r < 0.8$  indicates a moderate similarity, and  $r < 0.5$  denotes little or no similarity. The *R/U* ratio indicates the percentage of the >93 reported chemical abundances differ by more than an expected number of uncertainty intervals. The normal probability density function of 68%, 95.5%, and 99.7% for  $\pm 1 \sigma$ ,  $\pm 2 \sigma$ , and  $\pm 3 \sigma$ , respectively, is used to evaluate the *R/U* ratios. The two profiles are considered to be similar, within the uncertainties of the chemical abundances when 80% of the *R/U* ratios are within  $\pm 3 \sigma$ , with  $r > 0.8$  and  $P > 0.05$ . Species with *R/U* ratios  $> 3 \sigma$  are further examined as these may be markers that further allow source contributions to be distinguished by receptor measurements. They may also reflect the sampling and analysis artifacts that are not representative of the larger population of source profiles.

<sup>b</sup>Includes two paired samples for 2- and 7-days of atmospheric aging.

<sup>c</sup>Degree of freedom

<sup>d</sup>"All Fresh 2" includes fresh, unaged profiles from both Putnam (FL1) and Everglades (FL2) peats for the 2-days experiment (same as "All Fresh 7" for the 7-days experiment); "All Aged 2" includes 2-day aged profiles from both Putnam (FL1) and Everglades (FL2) peats, downstream of the oxidation flow reactor for the 2-days aging experiment (same as "All Aged 7" for the 7-days aging experiment); "All Fresh" includes combined Putnam (FL1) and Everglades (FL2) Fresh 2 and Fresh 7 peats (same as "All Aged" for Aged 2 and Aged 7 peats).



Table S5

Summary of Student *t*-tests for fresh vs. aged peat combustion source profiles for PM<sub>2.5</sub> mass ( $\mu\text{g m}^{-3}$ ).

| Paired Comparison                   | n1 <sup>a</sup> | n2 <sup>a</sup> | Student <i>t</i> -Test | df <sup>b</sup> | <i>P</i> -value <sup>c</sup> |
|-------------------------------------|-----------------|-----------------|------------------------|-----------------|------------------------------|
| All Fresh vs. All Aged <sup>d</sup> | 32              | 32              | paired                 | 31              | 0.504                        |
| Fresh2 vs. Aged2                    | 17              | 17              | paired                 | 16              | 0.043                        |
| Fresh7 vs. Aged7                    | 15              | 15              | paired                 | 14              | 0.041                        |
| Fresh2 vs. Fresh7                   | 17              | 15              | 2 sample               | 30              | 0.712                        |
| Aged2 vs. Aged7                     | 17              | 15              | 2 sample               | 30              | 0.272                        |

<sup>a</sup>Includes 17 and 15 paired fresh and aged profiles for 2- and 7-days of atmospheric aging, respectively.

<sup>b</sup>Degree of freedom

<sup>c</sup>Student *t*-tests, a cutoff probability level of 5% is selected. The highlighted *P*-value denotes that  $P < 0.05$  and there is a 95% probability that two profiles are different.

<sup>d</sup>"All Fresh" includes both Fresh 2 and Fresh 7 profiles; and "All Aged" includes both Aged 2 and Aged 7 profiles.

Table S6

Percent (%) of PM<sub>2.5</sub> mass explained by the sum of measured species for the six peats

| Type of Peat                                 | (Sum of Species <sup>a</sup> /Mass) x 100% |             |             |             |
|----------------------------------------------|--------------------------------------------|-------------|-------------|-------------|
|                                              | Fresh 2                                    | Aged 2      | Fresh 7     | Aged 7      |
| Odintsovo, Russia                            | 62.2 ± 1.8                                 | 52.3 ± 6.1  | 63.5 ± 5.0  | 50.2 ± 7.7  |
| Pskov, Siberia                               | 79.1 ± 5.6                                 | 75.9 ± 13.4 | 83.7 ± 10.4 | 72.8 ± 13.4 |
| Northern Alaska, USA                         | 82.8 ± 6.5                                 | 76.7 ± 9.3  | 75.5 ± 21.3 | 63.3 ± 5.3  |
| Putnam County Lakebed, Florida, USA (FL1)    | 80.3 ± 17.5                                | 79.3 ± 2.5  | 69.8 ± 4.7  | 73.4 ± 5.0  |
| Everglades National Park, Florida, USA (FL2) | 89.8 ± 28.1                                | 73.0 ± 10.1 | 88.4 ± 7.2  | 69.0 ± 4.4  |
| Borneo, Malaysia                             | 80.9 ± 3.6                                 | 79.5 ± 18.8 | 83.1 ± 1.3  | 70.2 ± 9.0  |
| Average ± SD                                 | 79.2 ± 10.5                                | 72.8 ± 10.0 | 77.3 ± 8.3  | 66.5 ± 7.5  |

<sup>a</sup>Sum of species includes 51 elements, water-soluble Na<sup>+</sup>, NH<sub>4</sub><sup>+</sup>, NO<sub>2</sub><sup>-</sup>, NO<sub>3</sub><sup>-</sup>, SO<sub>4</sub><sup>2-</sup>, OC, and EC. Water-soluble Cl<sup>-</sup> and K<sup>+</sup> by ion chromatography are not included because of the inclusion of Cl and K measured by x-ray fluorescence, to avoid double counting.

Table S7

Differences of WSOC abundances<sup>a</sup> in PM<sub>2.5</sub> between the aged and fresh profiles

| Peat Location                       | Differences and associated uncertainties between aged and fresh WSOC abundances in PM <sub>2.5</sub> |               |
|-------------------------------------|------------------------------------------------------------------------------------------------------|---------------|
|                                     | 2-day aging                                                                                          | 7-day aging   |
| Odintsovo, Russia                   | -5.17 ± 4.16 <sup>b</sup>                                                                            | -6.56 ± 6.72  |
| Pskov, Siberia                      | 6.04 ± 7.34                                                                                          | -2.62 ± 8.91  |
| Northern Alaska, USA                | -0.97 ± 9.80                                                                                         | -5.81 ± 11.93 |
| Putnam County Lakebed, USA (FL1)    | 3.18 ± 6.44                                                                                          | 6.82 ± 1.86   |
| Everglades National Park, USA (FL2) | -2.82 ± 9.30                                                                                         | -11.05 ± 5.57 |
| Borneo, Malaysia                    | 8.26 ± 2.51                                                                                          | 5.75 ± 2.90   |

<sup>a</sup>See Table 1 for WSOC (water-soluble organic carbon) abundances in PM<sub>2.5</sub>.<sup>b</sup>Difference in WSOC abundance= Aged minus Fresh. Plus or minus signs indicate the increase and decrease, respectively in WSOC/PM<sub>2.5</sub> ratios after atmospheric aging; the uncertainty of the difference is based on square root of the sum of the squared uncertainties associated with each averaged profile.

Table S8

Equivalence measures<sup>a</sup> for 25 and 60% fuel moisture content source profiles for the Putnam County Lakebed, Florida (FL1) peat.

| Paired Comparison <sup>b</sup> | Percent Distribution |                |                |                 | Correlation Coefficient (r) | Student <i>t</i> -Test | df <sup>c</sup> | <i>P</i> -value |
|--------------------------------|----------------------|----------------|----------------|-----------------|-----------------------------|------------------------|-----------------|-----------------|
|                                | < 1 $\sigma$         | 1 - 2 $\sigma$ | 2 - 3 $\sigma$ | $\geq 3 \sigma$ |                             |                        |                 |                 |
| FL25 Fresh2 vs. FL60 Fresh2    | 73.39%               | 16.13%         | 4.03%          | 6.45%           | 0.997                       | Paired                 | 126             | 0.00000021      |
| FL25 Aged2 vs. FL60 Aged2      | 88.80%               | 6.40%          | 2.40%          | 2.40%           | 0.999                       | Paired                 | 126             | 0.00020671      |
| All Fresh vs. All Aged         | 79.37%               | 19.84%         | 0.00%          | 0.79%           | 0.998                       | Paired                 | 126             | 0.00000243      |

<sup>a</sup>For the *t*-test, a cutoff probability level of 5% is selected; if  $P < 0.05$ , there is a 95% probability that the two profiles are different. For correlations,  $r > 0.8$  suggests similar profiles,  $0.5 < r < 0.8$  indicates a moderate similarity, and  $r < 0.5$  denotes little or no similarity. The *R/U* ratio indicates the percentage of the >93 reported chemical abundances differ by more than an expected number of uncertainty intervals. The normal probability density function of 68%, 95.5%, and 99.7% for  $\pm 1\sigma$ ,  $\pm 2\sigma$ , and  $\pm 3\sigma$ , respectively, is used to evaluate the *R/U* ratios. The two profiles are considered to be similar, within the uncertainties of the chemical abundances when 80% of the *R/U* ratios are within  $\pm 3\sigma$  with  $r > 0.8$  and  $P > 0.05$ . Species with *R/U* ratios  $> 3\sigma$  are further examined as these may be markers that further allow source contributions to be distinguished by receptor measurements. They may also reflect the sampling and analysis artifacts that are not representative of the larger population of source profiles.

<sup>b</sup>FL25 and FL60 denote peats with 25% and 60% fuel moisture contents; "All Fresh" and "All Aged" includes both 25% and 60% fuel moisture content peats for the Fresh vs. Aged comparison with 2-day aging times.

<sup>c</sup>Degree of freedom
